# Supplementary material for: Update a biogeochemical model with process-based algorithms to predict ammonia volatilization from fertilized uplands and rice paddy fields
Source: Copernicus journal article supplement (doi:10.5194/bg-2021-341), 2022-01-17
Supplement: Supplementary file 1 [file Fig. S1.docx]

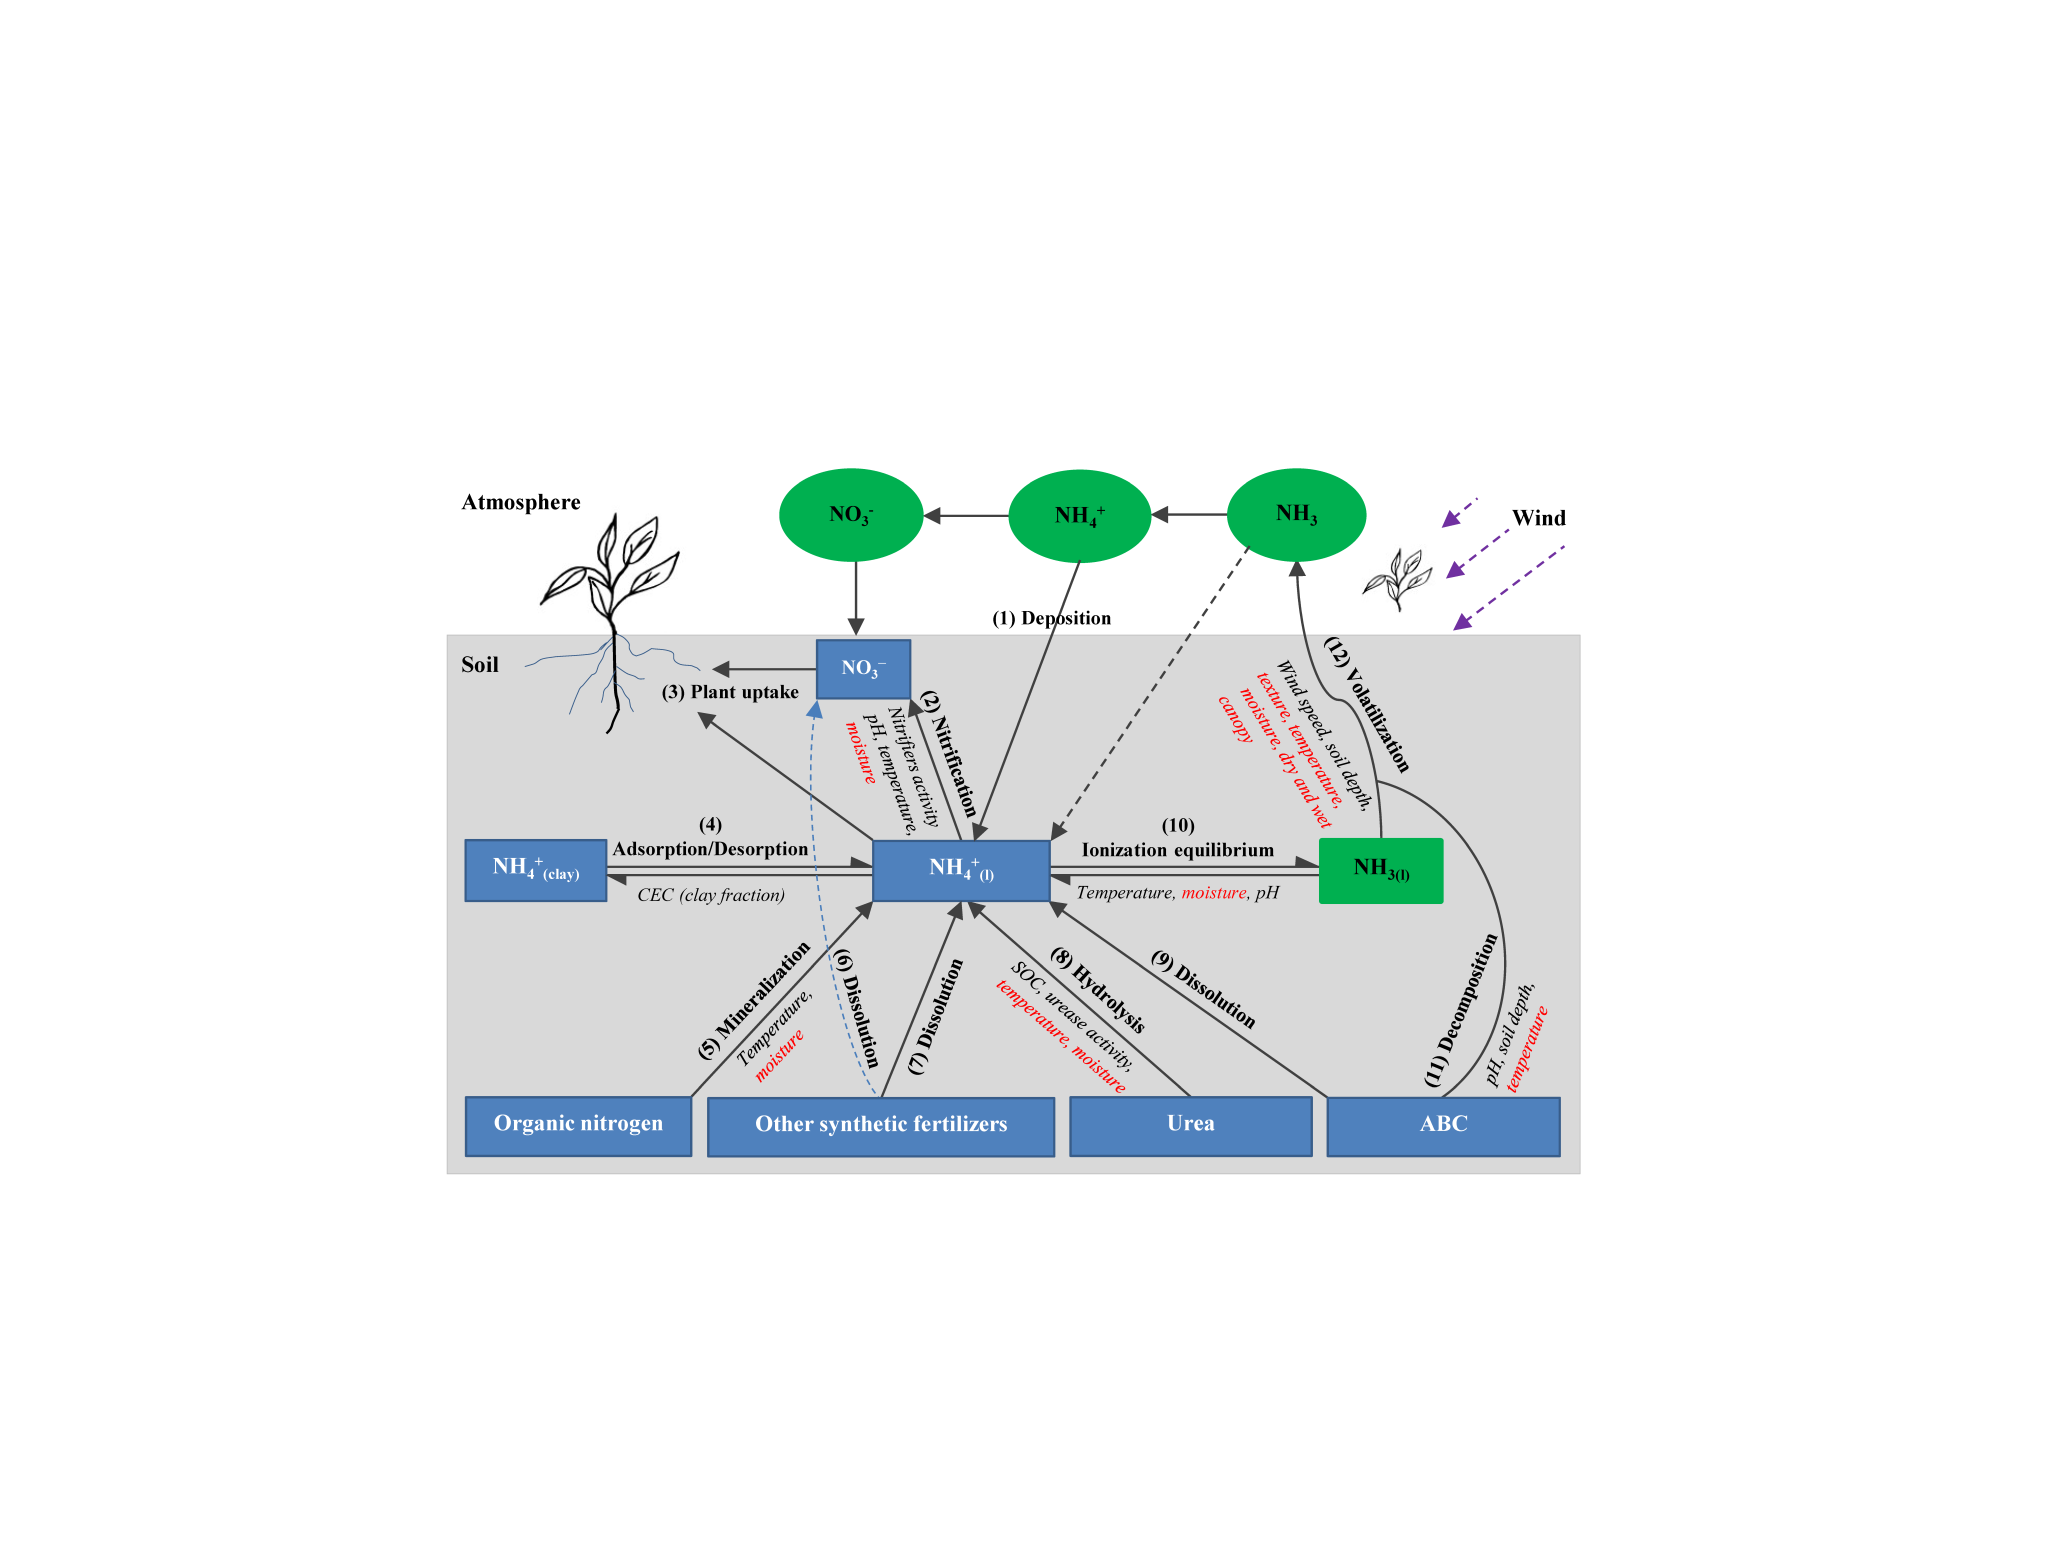


**Fig. S1** CNMM-DNDC model-included processes determining ammonium (NH4+), ammonia (NH3) concentrations in the liquid phase of a soil, and ammonium bicarbonate decomposition (ABC), and thus volatilization of this nitrogenous gas in the uplands. This figure was drawn by decoding the original and revised Catchment Nutrient Management Model - DeNitrification DeComposition (i.e., CNMM-DNDC) model. NH4+(clay) denotes the NH4+ adsorbed by clay minerals. NH4+(l) and NH3(l) are referred to as the dissolved NH4+ and NH3, respectively, in the liquid phase of a soil. Bold word(s) aside arrow(s) indicate(s) the nitrogen transfer/transformation process(es). Italic word(s) aside arrow(s) is/are the regulating factor(s) for the corresponding process(es). The influencing factors with their parameters/parameterizations/definitions fully inherited from the original DNDC95 (http://www.dndc.sr.unh.edu/) with minor changes by Cui et al. (2014) are shown in black color; and those newly added/calibrated in the study of Dubache et al. (2019) and Li et al., (2019), are displayed in red color.

**Reference**

Dubache, G., Li, S., Zheng, X., Zhang, W., Deng, J., 2019. Modeling ammonia volatilization following urea application to winter cereal fields in the United Kingdom by a revised biogeochemical model. Sci. Total Environ. 660, 1403–1418. http://dx.doi.org/10.1016/j.scitotenv.2018.12.407

Li, S., Zheng, X., Zhang, W., Han, S., Deng, J., Wang, K., Wang, R., Yao, Z., Liu, C., 2019. Modeling ammonia volatilization following the application of synthetic fertilizers to cultivated uplands with calcareous soils using an improved DNDC biogeochemistry model. Sci. Total Environ. 660, 931–946. http://dx.doi.org/10.1016/j.scitotenv.2018.12.379

Cui, F., Zheng, X., Liu, C., Wang, K., Zhou, Z., Deng, J., 2014. Assessing biogeochemical effects and best management practice for a wheat–maize cropping system using the DNDC model. Biogeosciences 10, 8561–8609. http://dx.doi.org/10.5194/bg-11-91-2014.
