# Supplementary material for: Update a biogeochemical model with process-based algorithms to predict ammonia volatilization from fertilized uplands and rice paddy fields
Source: Copernicus journal article supplement (doi:10.5194/bg-2021-341), 2022-01-17
Supplement: Supplementary file 2 [file Table S1.docx]

**Table S1** The daily meteorological variables for individual paddy rice field sites in the year(s) with observations of ammonia volatilization.

| CS | | | | | | | | DY | | | | | | |
| --- | --- | --- | --- | --- | --- | --- | --- | --- | --- | --- | --- | --- | --- | --- |
| Date | *T*max | *T*min | *P* | *W* | *R*max | *M* | RH | Date | *T*max | *T*min | *P* | *W* | *R*ave | RH |
| 2002/1/1 | 9.6 | 1.6 | 0 | 2.5 | 602 | 1225 | 75 | 1984/1/1 | 4.4 | –5.7 | 0 | 0.8 | 128.7 | 70 |
| 2002/1/2 | 8.7 | –1.4 | 0 | 1.5 | 575 | 1214 | 74 | 1984/1/2 | 7.4 | –3.3 | 0 | 2.3 | 121.8 | 76 |
| 2002/1/3 | 13.0 | –0.8 | 0 | 1.8 | 507 | 1157 | 71 | 1984/1/3 | 3.4 | –1.9 | 0 | 3.8 | 131.9 | 58 |
| 2002/1/4 | 13.9 | 2.7 | 0 | 3.0 | 570 | 1207 | 66 | 1984/1/4 | 1.4 | –5.1 | 0 | 1.5 | 63.2 | 57 |
| 2002/1/5 | 15.7 | 1.6 | 0 | 1.5 | 541 | 1132 | 73 | 1984/1/5 | 4.2 | –6.0 | 0 | 1 | 140 | 68 |
| 2002/1/6 | 15.4 | 3.6 | 0 | 2.3 | 532 | 1128 | 78 | 1984/1/6 | 6.4 | –1.7 | 0 | 0.8 | 119.2 | 70 |
| 2002/1/7 | 11.7 | 2.6 | 0 | 4.3 | 600 | 1147 | 48 | 1984/1/7 | 7.5 | –3.5 | 0 | 1.5 | 117.1 | 77 |
| 2002/1/8 | 8.0 | –3.3 | 0 | 1.0 | 641 | 1202 | 48 | 1984/1/8 | 9.5 | –3.2 | 0 | 2 | 129.9 | 57 |
| 2002/1/9 | 11.0 | –2.6 | 0 | 3.0 | 591 | 1137 | 60 | 1984/1/9 | 12.4 | –2.5 | 0 | 2 | 131.6 | 48 |
| 2002/1/10 | 16.3 | 4.0 | 0 | 1.8 | 538 | 1232 | 72 | 1984/1/10 | 14.5 | –1.4 | 0 | 1.8 | 130.9 | 61 |
| 2002/1/11 | 17.9 | 2.8 | 0 | 1.3 | 446 | 1200 | 80 | 1984/1/11 | 10.8 | 1.6 | 0 | 3.3 | 97.9 | 69 |
| 2002/1/12 | 15.5 | 5.4 | 0 | 1.3 | 593 | 1111 | 91 | 1984/1/12 | 12.2 | 3.2 | 0 | 2 | 102 | 75 |
| 2002/1/13 | 19.5 | 7.6 | 0 | 1.3 | 540 | 1225 | 90 | 1984/1/13 | 10.2 | –0.7 | 0 | 1 | 117.7 | 75 |
| 2002/1/14 | 20.1 | 10.5 | 0 | 1.5 | 478 | 1216 | 91 | 1984/1/14 | 15.4 | 0.8 | 0 | 2.8 | 87.2 | 74 |
| 2002/1/15 | 17.8 | 14.7 | 0.01 | 1.8 | 70 | 1449 | 100 | 1984/1/15 | 10.4 | 0.3 | 0.15 | 4.8 | 20.5 | 61 |
| 2002/1/16 | 16.6 | 3.2 | 0.46 | 4.5 | 37 | 941 | 91 | 1984/1/16 | 2.2 | –4.5 | 0 | 2.3 | 143.3 | 46 |
| 2002/1/17 | 4.1 | 0.5 | 0.03 | 3.5 | 258 | 1103 | 87 | 1984/1/17 | 2.3 | –0.2 | 0.29 | 3.8 | 13.9 | 69 |
| 2002/1/18 | 5.9 | 0.4 | 1.01 | 3.0 | 343 | 1300 | 90 | 1984/1/18 | 0.5 | 0.1 | 4.12 | 3.8 | 0 | 99 |
| 2002/1/19 | 7.1 | 1.1 | 0 | 1.8 | 696 | 1219 | 78 | 1984/1/19 | 2.3 | –0.3 | 0.32 | 2.8 | 82.3 | 82 |
| 2002/1/20 | 9.0 | 2.0 | 0 | 2.5 | 635 | 1029 | 69 | 1984/1/20 | –0.1 | –1.9 | 0 | 2.3 | 69.2 | 73 |
| 2002/1/21 | 7.8 | 1.4 | 0 | 3.8 | 636 | 1135 | 50 | 1984/1/21 | 1.1 | –4.3 | 0 | 1.5 | 92.7 | 83 |
| 2002/1/22 | 8.5 | 1.0 | 0 | 2.8 | 654 | 1231 | 44 | 1984/1/22 | –0.6 | –6.3 | 0 | 1 | 117.4 | 64 |
| 2002/1/23 | 5.2 | –0.4 | 0 | 2.8 | 670 | 1206 | 64 | 1984/1/23 | 1.5 | –6.8 | 0 | 1.5 | 103.2 | 79 |
| 2002/1/24 | 7.9 | –2.9 | 0 | 1.8 | 824 | 1152 | 76 | 1984/1/24 | 1.9 | –3.2 | 0 | 2.5 | 106.2 | 74 |
| 2002/1/25 | 6.5 | 2.8 | 0.37 | 3.8 | 151 | 1047 | 88 | 1984/1/25 | 2.9 | –3.7 | 0 | 1.3 | 109.4 | 81 |
| 2002/1/26 | 6.7 | 3.5 | 0.44 | 4.3 | 123 | 1549 | 88 | 1984/1/26 | 2.4 | –2.8 | 0 | 3.3 | 160.5 | 77 |
| 2002/1/27 | 8.1 | 2.4 | 0 | 2.8 | 540 | 1206 | 78 | 1984/1/27 | 2.8 | –1.3 | 0 | 3.3 | 105.2 | 76 |
| 2002/1/28 | 7.4 | –1.0 | 0 | 1.5 | 598 | 1214 | 73 | 1984/1/28 | 2.3 | 0.1 | 0.01 | 2.5 | 48.5 | 80 |
| 2002/1/29 | 7.9 | –1.6 | 0 | 1.3 | 638 | 1222 | 69 | 1984/1/29 | 0.6 | –1.6 | 0.35 | 3.8 | 0 | 86 |
| 2002/1/30 | 9.3 | 0.2 | 0 | 2.0 | 566 | 1200 | 64 | 1984/1/30 | 1 | –0.5 | 0.38 | 3.3 | 3.5 | 93 |
| 2002/1/31 | 8.5 | –1.2 | 0 | 1.3 | 741 | 1134 | 78 | 1984/1/31 | 2.5 | –0.6 | 0.05 | 1.3 | 115.3 | 69 |
| 2002/2/1 | 10.5 | 0.8 | 0 | 1.8 | 582 | 1152 | 75 | 1984/2/1 | 3.4 | –3.8 | 0 | 1.5 | 98.8 | 87 |
| 2002/2/2 | 11.7 | 1.0 | 0 | 2.3 | 664 | 1209 | 61 | 1984/2/2 | 2 | –2.4 | 0 | 4.8 | 119.4 | 62 |
| 2002/2/3 | 12.9 | –1.8 | 0 | 1.3 | 682 | 1244 | 75 | 1984/2/3 | 1.8 | –4.0 | 0 | 2.5 | 149 | 67 |
| 2002/2/4 | 10.1 | 2.3 | 0 | 2.8 | 341 | 1138 | 90 | 1984/2/4 | 2.6 | 0.1 | 0.2 | 1.8 | 0 | 90 |
| 2002/2/5 | 13.4 | 3.8 | 0 | 1.0 | 647 | 1222 | 84 | 1984/2/5 | 3 | 1.7 | 0.26 | 3 | 0 | 80 |
| 2002/2/6 | 15.2 | 2.5 | 0 | 1.0 | 598 | 1312 | 82 | 1984/2/6 | 2.1 | –3.6 | 0 | 3.5 | 128.2 | 52 |
| 2002/2/7 | 14.9 | 4.7 | 0 | 2.5 | 530 | 1224 | 80 | 1984/2/7 | 1.7 | –4.9 | 0 | 2 | 169.8 | 52 |
| 2002/2/8 | 15.5 | 6.9 | 0 | 3.5 | 538 | 1254 | 83 | 1984/2/8 | 4.1 | –4.9 | 0 | 1.5 | 157.6 | 63 |
| 2002/2/9 | 7.3 | 1.6 | 0 | 3.0 | 877 | 1251 | 72 | 1984/2/9 | 2.5 | –0.9 | 0 | 2.3 | 52.2 | 69 |
| 2002/2/10 | 11.1 | 1.1 | 0 | 3.0 | 710 | 1219 | 65 | 1984/2/10 | 1.2 | –1.0 | 0.2 | 2.5 | 0 | 92 |
| 2002/2/11 | 12.6 | 0.3 | 0 | 1.8 | 701 | 1230 | 60 | 1984/2/11 | 3.8 | 0.7 | 0.1 | 1.5 | 20.6 | 95 |
| 2002/2/12 | 16.0 | 5.2 | 0 | 2.5 | 738 | 1150 | 58 | 1984/2/12 | 3.5 | 2.2 | 0.05 | 0.8 | 12.3 | 93 |
| 2002/2/13 | 12.9 | 4.9 | 0 | 3.3 | 721 | 1048 | 71 | 1984/2/13 | 6.7 | 1 | 0 | 3 | 42.5 | 79 |
| 2002/2/14 | 10.0 | 5.6 | 0 | 3.5 | 361 | 1147 | 74 | 1984/2/14 | 6.3 | 2.7 | 0 | 0.8 | 38.4 | 83 |
| 2002/2/15 | 12.3 | 3.1 | 0 | 2.0 | 796 | 1226 | 75 | 1984/2/15 | 7.9 | 2.2 | 0 | 0 | 70.8 | 87 |
| 2002/2/16 | 12.1 | 2.2 | 0 | 1.5 | 649 | 1443 | 86 | 1984/2/16 | 7.8 | 4.4 | 0.21 | 2.5 | 29.9 | 89 |
| 2002/2/17 | 17.2 | 8.8 | 0 | 3.8 | 715 | 1237 | 83 | 1984/2/17 | 6.3 | 0.9 | 0.09 | 3.3 | 13.7 | 85 |
| 2002/2/18 | 10.4 | 4.9 | 0 | 4.0 | 710 | 1306 | 73 | 1984/2/18 | 4.8 | –3.1 | 0 | 1 | 193.3 | 77 |
| 2002/2/19 | 10.0 | 2.9 | 0 | 3.3 | 809 | 1217 | 65 | 1984/2/19 | 5.3 | –0.7 | 0 | 4 | 49.2 | 80 |
| 2002/2/20 | 13.1 | –1.3 | 0 | 2.5 | 938 | 1327 | 77 | 1984/2/20 | 7.3 | 2.7 | 0 | 2.8 | 53.4 | 78 |
| 2002/2/21 | 10.6 | 8.1 | 1.36 | 1.8 | 183 | 1211 | 96 | 1984/2/21 | 6.3 | 3.9 | 0.34 | 4.5 | 2.7 | 78 |
| 2002/2/22 | 13.6 | 6.9 | 0.14 | 3.0 | 847 | 1403 | 88 | 1984/2/22 | 5.6 | 3.6 | 1.02 | 3 | 0.9 | 95 |
| 2002/2/23 | 8.7 | 4.4 | 0.24 | 3.3 | 74 | 1335 | 89 | 1984/2/23 | 4.8 | 1.8 | 0.09 | 2.5 | 33.6 | 84 |
| 2002/2/24 | 11.8 | 2.0 | 0 | 2.3 | 738 | 1215 | 86 | 1984/2/24 | 5.5 | 1.9 | 0.05 | 2.8 | 46.3 | 81 |
| 2002/2/25 | 15.3 | 1.6 | 0 | 2.3 | 700 | 1143 | 86 | 1984/2/25 | 7.5 | 3.1 | 0.01 | 2.8 | 56 | 76 |
| 2002/2/26 | 10.3 | 8.3 | 0.01 | 2.3 | 562 | 1016 | 98 | 1984/2/26 | 8.5 | 0.7 | 0 | 2.5 | 163.1 | 60 |
| 2002/2/27 | 8.8 | 7.1 | 1.03 | 3.0 | 61 | 1233 | 100 | 1984/2/27 | 7.4 | 0 | 0 | 2.3 | 197.9 | 61 |
| 2002/2/28 | 10.7 | 7.1 | 0 | 2.5 | 309 | 1355 | 91 | 1984/2/28 | 5.6 | 0.5 | 0 | 2 | 111.5 | 61 |
| 2002/3/1 | 10.4 | 7.5 | 0.47 | 3.0 | 181 | 1237 | 90 | 1984/2/29 | 5.7 | –2.2 | 0 | 1.8 | 195.5 | 41 |
| 2002/3/2 | 8.5 | 5.9 | 2.26 | 4.3 | 12 | 1232 | 97 | 1984/3/1 | 11.5 | –0.1 | 0 | 3.8 | 133.7 | 49 |
| 2002/3/3 | 8.1 | 6.0 | 0.36 | 4.3 | 70 | 1206 | 92 | 1984/3/2 | 15.8 | 1.3 | 0 | 3.5 | 176.4 | 45 |
| 2002/3/4 | 7.8 | 5.8 | 1.3 | 3.8 | 149 | 1021 | 94 | 1984/3/3 | 9.5 | –1.4 | 0 | 2.3 | 197.5 | 53 |
| 2002/3/5 | 6.5 | 4.8 | 0.74 | 4.3 | 152 | 1312 | 95 | 1984/3/4 | 11 | –0.3 | 0 | 4 | 211.9 | 56 |
| 2002/3/6 | 13.7 | 3.8 | 0 | 3.0 | 787 | 1146 | 77 | 1984/3/5 | 17.3 | 2.2 | 0 | 3.5 | 147.2 | 59 |
| 2002/3/7 | 17.1 | 3.1 | 0 | 1.5 | 674 | 1150 | 78 | 1984/3/6 | 10.3 | 3.1 | 0 | 3.5 | 165.4 | 66 |
| 2002/3/8 | 18.7 | 5.3 | 0 | 1.8 | 662 | 1256 | 73 | 1984/3/7 | 7.7 | 2.7 | 0 | 3 | 41.2 | 68 |
| 2002/3/9 | 21.5 | 7.6 | 0 | 3.0 | 705 | 1231 | 80 | 1984/3/8 | 11.2 | 1.2 | 0 | 4 | 172 | 62 |
| 2002/3/10 | 21.4 | 9.3 | 0 | 2.5 | 674 | 1131 | 89 | 1984/3/9 | 12.3 | 4.3 | 0 | 1.8 | 145.9 | 77 |
| 2002/3/11 | 16.8 | 6.3 | 0 | 2.5 | 693 | 1203 | 87 | 1984/3/10 | 10 | 1.8 | 0 | 2 | 202.8 | 43 |
| 2002/3/12 | 17.1 | 10.3 | 1.2 | 1.8 | 868 | 1152 | 97 | 1984/3/11 | 15.6 | 4.5 | 0 | 3.3 | 173.6 | 56 |
| 2002/3/13 | 16.7 | 8.9 | 0.47 | 4.0 | 722 | 1000 | 95 | 1984/3/12 | 18.8 | 6 | 0 | 3 | 69.8 | 71 |
| 2002/3/14 | 15.8 | 13.3 | 0.71 | 3.3 | 559 | 938 | 95 | 1984/3/13 | 14.3 | 5.5 | 0.09 | 3.5 | 12.5 | 79 |
| 2002/3/15 | 21.1 | 10.8 | 0 | 2.8 | 804 | 1121 | 87 | 1984/3/14 | 9.1 | 4.7 | 0.18 | 2.3 | 25.2 | 91 |
| 2002/3/16 | 19.8 | 7.9 | 0 | 1.0 | 632 | 1058 | 83 | 1984/3/15 | 9.8 | 7.2 | 0.87 | 2.3 | 13 | 92 |
| 2002/3/17 | 22.8 | 12.0 | 0 | 3.5 | 736 | 1122 | 65 | 1984/3/16 | 12.7 | 8 | 0 | 3 | 117.1 | 79 |
| 2002/3/18 | 17.7 | 5.6 | 0 | 3.0 | 810 | 1158 | 51 | 1984/3/17 | 13.8 | 3.9 | 0 | 4.5 | 186 | 61 |
| 2002/3/19 | 23.0 | 10.8 | 0 | 3.3 | 790 | 1200 | 65 | 1984/3/18 | 11.4 | 7.5 | 0.66 | 2.8 | 13.1 | 85 |
| 2002/3/20 | 24.4 | 11.4 | 0 | 3.3 | 778 | 1145 | 75 | 1984/3/19 | 9.3 | 6.2 | 0.56 | 1.8 | 39 | 81 |
| 2002/3/21 | 20.0 | 10.0 | 1.11 | 3.3 | 917 | 1312 | 79 | 1984/3/20 | 14.7 | 3.3 | 0 | 4 | 165.2 | 63 |
| 2002/3/22 | 12.8 | 7.2 | 1.45 | 2.8 | 270 | 1008 | 90 | 1984/3/21 | 9.5 | 1.7 | 0 | 3.3 | 120.5 | 60 |
| 2002/3/23 | 16.2 | 4.8 | 0 | 2.0 | 662 | 1023 | 70 | 1984/3/22 | 11.7 | 3.1 | 0 | 3.8 | 233.4 | 62 |
| 2002/3/24 | 12.8 | 8.9 | 0.01 | 3.3 | 95 | 1036 | 82 | 1984/3/23 | 17.1 | 4 | 0 | 3 | 225.6 | 70 |
| 2002/3/25 | 12.0 | 8.6 | 0.04 | 2.8 | 229 | 1033 | 97 | 1984/3/24 | 15.2 | 8.2 | 0 | 3.3 | 140 | 68 |
| 2002/3/26 | 14.8 | 10.6 | 1.58 | 1.5 | 505 | 947 | 98 | 1984/3/25 | 13.3 | 7.6 | 0 | 3.5 | 89 | 65 |
| 2002/3/27 | 14.1 | 10.8 | 0.15 | 2.8 | 850 | 1345 | 91 | 1984/3/26 | 10.5 | 6.4 | 0 | 3.3 | 59.3 | 81 |
| 2002/3/28 | 14.1 | 9.1 | 0.02 | 1.8 | 147 | 1253 | 96 | 1984/3/27 | 10.8 | 8.3 | 0.44 | 3.3 | 25.7 | 80 |
| 2002/3/29 | 16.9 | 10.8 | 0.01 | 2.3 | 733 | 1349 | 90 | 1984/3/28 | 15.7 | 3.4 | 0.01 | 2 | 250.3 | 71 |
| 2002/3/30 | 23.0 | 9.8 | 0 | 3.8 | 779 | 1230 | 81 | 1984/3/29 | 20.6 | 8 | 0 | 3.8 | 250.8 | 74 |
| 2002/3/31 | 23.7 | 11.0 | 0 | 2.5 | 794 | 1250 | 66 | 1984/3/30 | 24.7 | 10.2 | 0 | 1.8 | 235.8 | 73 |
| 2002/4/1 | 25.5 | 12.1 | 0 | 2.8 | 729 | 1227 | 75 | 1984/3/31 | 19.6 | 9.3 | 0.25 | 3.5 | 72.7 | 76 |
| 2002/4/2 | 22.6 | 15.4 | 4.37 | 1.8 | 666 | 1452 | 97 | 1984/4/1 | 12.5 | 8.6 | 0.06 | 2.8 | 181.2 | 73 |
| 2002/4/3 | 22.7 | 12.4 | 0 | 2.0 | 925 | 1121 | 91 | 1984/4/2 | 14.8 | 9.4 | 0 | 4.5 | 99.2 | 80 |
| 2002/4/4 | 19.2 | 10.6 | 0 | 5.0 | 813 | 1108 | 92 | 1984/4/3 | 13.8 | 10.5 | 0.3 | 2.8 | 58.3 | 89 |
| 2002/4/5 | 25.6 | 15.7 | 0.05 | 6.3 | 728 | 1311 | 89 | 1984/4/4 | 13.1 | 9.8 | 0.24 | 1.5 | 34.5 | 95 |
| 2002/4/6 | 22.9 | 17.5 | 0.2 | 2.0 | 622 | 1411 | 92 | 1984/4/5 | 12.8 | 8.6 | 0.01 | 2.5 | 43.4 | 73 |
| 2002/4/7 | 21.9 | 12.7 | 0 | 2.8 | 855 | 1308 | 88 | 1984/4/6 | 12.7 | 6 | 0 | 3.8 | 256.9 | 62 |
| 2002/4/8 | 16.3 | 8.6 | 0.78 | 2.5 | 872 | 1323 | 71 | 1984/4/7 | 15.4 | 4.2 | 0 | 4.3 | 231.6 | 58 |
| 2002/4/9 | 17.2 | 9.2 | 0 | 2.0 | 939 | 1145 | 68 | 1984/4/8 | 11.9 | 8.2 | 0.63 | 4.5 | 14.5 | 82 |
| 2002/4/10 | 15.0 | 10.5 | 0.43 | 1.5 | 215 | 834 | 79 | 1984/4/9 | 10.5 | 9.3 | 0.11 | 3 | 21.2 | 91 |
| 2002/4/11 | 16.6 | 9.9 | 0.04 | 2.3 | 707 | 1305 | 79 | 1984/4/10 | 12.9 | 8 | 0.06 | 2.5 | 109.8 | 83 |
| 2002/4/12 | 22.8 | 11.6 | 0 | 3.3 | 888 | 1154 | 73 | 1984/4/11 | 16.9 | 6.4 | 0 | 3.5 | 219.4 | 69 |
| 2002/4/13 | 26.3 | 11.1 | 0 | 3.0 | 912 | 1155 | 73 | 1984/4/12 | 13.4 | 9.7 | 0.19 | 2.3 | 60.4 | 55 |
| 2002/4/14 | 25.0 | 17.9 | 0 | 5.0 | 896 | 1137 | 59 | 1984/4/13 | 19 | 7.3 | 0 | 2 | 249.2 | 70 |
| 2002/4/15 | 26.3 | 19.7 | 0.01 | 3.3 | 676 | 1159 | 83 | 1984/4/14 | 21.6 | 8.5 | 0 | 3.8 | 247.6 | 73 |
| 2002/4/16 | 24.1 | 16.2 | 0.48 | 4.3 | 532 | 931 | 85 | 1984/4/15 | 26.3 | 10.8 | 0 | 2.5 | 255.8 | 70 |
| 2002/4/17 | 17.4 | 11.9 | 0.28 | 2.8 | 853 | 927 | 77 | 1984/4/16 | 28.7 | 13.6 | 0 | 3.5 | 257.9 | 73 |
| 2002/4/18 | 15.7 | 11.2 | 0 | 2.0 | 411 | 1350 | 75 | 1984/4/17 | 23.3 | 14.3 | 0.5 | 4.3 | 21.2 | 91 |
| 2002/4/19 | 16.6 | 9.1 | 0.36 | 2.8 | 459 | 918 | 93 | 1984/4/18 | 14.6 | 10.6 | 0.99 | 4 | 22.3 | 79 |
| 2002/4/20 | 15.7 | 14.0 | 1.23 | 2.0 | 630 @ | 1200 @ | 100 | 1984/4/19 | 17.5 | 6.8 | 0 | 2.8 | 272 | 79 |
| 2002/4/21 | 20.8 | 15.0 | 0.03 | 2.3 | 801 | 1357 | 97 | 1984/4/20 | 13.3 | 9.3 | 1.93 | 4.8 | 21.1 | 92 |
| 2002/4/22 | 23.3 | 16.2 | 0.09 | 3.0 | 305 | 1634 | 99 | 1984/4/21 | 14.2 | 11 | 0.09 | 2.8 | 87.8 | 88 |
| 2002/4/23 | 19.9 | 12.8 | 0 | 3.5 | 464 | 1124 | 98 | 1984/4/22 | 19.4 | 6 | 0 | 0.8 | 208 | 79 |
| 2002/4/24 | 14.2 | 10.6 | 0.04 | 4.0 | 185 | 1251 | 75 | 1984/4/23 | 20.9 | 9.4 | 0 | 2.3 | 189.5 | 71 |
| 2002/4/25 | 13.2 | 9.6 | 0 | 2.8 | 338 | 1149 | 75 | 1984/4/24 | 21.7 | 11 | 0.02 | 3.8 | 75 | 60 |
| 2002/4/26 | 18.4 | 8.4 | 0 | 3.5 | 1180 | 1258 | 77 | 1984/4/25 | 22 | 12.5 | 0.03 | 2.5 | 168.6 | 79 |
| 2002/4/27 | 19.5 | 12.6 | 0.01 | 3.3 | 1165 | 1218 | 84 | 1984/4/26 | 24.7 | 13.9 | 0 | 3 | 228.2 | 81 |
| 2002/4/28 | 19.3 | 12.7 | 0 | 2.8 | 893 | 1005 | 95 | 1984/4/27 | 20.3 | 15.1 | 0 | 4 | 49.3 | 92 |
| 2002/4/29 | 28.5 | 15.6 | 0 | 3.3 | 843 | 1212 | 86 | 1984/4/28 | 19 | 14.3 | 0.06 | 2 | 77.7 | 94 |
| 2002/4/30 | 24.2 | 15.4 | 1.96 | 3.3 | 272 | 1337 | 98 | 1984/4/29 | 20.5 | 14.6 | 0 | 3.3 | 144.3 | 85 |
| 2002/5/1 | 20.4 | 13.7 | 0.02 | 1.3 | 781 | 1041 | 91 | 1984/4/30 | 22.2 | 14.6 | 0 | 3.8 | 219.3 | 84 |
| 2002/5/2 | 23.3 | 14.5 | 0.06 | 2.8 | 938 | 1418 | 93 | 1984/5/1 | 20.1 | 13.5 | 0 | 5.3 | 196.4 | 62 |
| 2002/5/3 | 20.4 | 17.3 | 0.02 | 2.0 | 869 | 1212 | 96 | 1984/5/2 | 19.5 | 10.3 | 0 | 3.8 | 173.8 | 70 |
| 2002/5/4 | 17.3 | 15.1 | 0.08 | 3.0 | 687 | 1133 | 98 | 1984/5/3 | 15.7 | 11.5 | 0.82 | 4.3 | 7.1 | 88 |
| 2002/5/5 | 16.8 | 14.8 | 3.55 | 3.3 | 275 | 1100 | 100 | 1984/5/4 | 13.7 | 11.5 | 1.77 | 3.5 | 12.3 | 92 |
| 2002/5/6 | 24.2 | 16.5 | 3.03 | 2.5 | 1176 | 1121 | 100 | 1984/5/5 | 16 | 11 | 1.53 | 3.3 | 25.8 | 87 |
| 2002/5/7 | 18.4 | 13.5 | 0.09 | 4.3 | 771 | 1234 | 92 | 1984/5/6 | 22.8 | 9.3 | 0 | 1.3 | 275.1 | 77 |
| 2002/5/8 | 20.5 | 11.9 | 0.01 | 1.3 | 1092 | 1202 | 88 | 1984/5/7 | 24.9 | 12.4 | 0 | 2.8 | 262.7 | 72 |
| 2002/5/9 | 16.3 | 14.0 | 1.86 | 2.3 | 135 | 1603 | 100 | 1984/5/8 | 27.8 | 13.2 | 0 | 2.5 | 248.8 | 71 |
| 2002/5/10 | 20.8 | 14.9 | 0.08 | 2.5 | 968 | 1259 | 95 | 1984/5/9 | 30.2 | 14.7 | 0 | 1.8 | 282.4 | 71 |
| 2002/5/11 | 22.4 | 14.8 | 0 | 3.0 | 987 | 1206 | 88 | 1984/5/10 | 30.2 | 17.3 | 0 | 3.5 | 294.6 | 66 |
| 2002/5/12 | 23.5 | 14.1 | 0 | 2.5 | 1130 | 1312 | 88 | 1984/5/11 | 30.7 | 18.1 | 0 | 3.8 | 259.4 | 79 |
| 2002/5/13 | 21.0 | 15.9 | 0.02 | 4.3 | 418 | 953 | 93 | 1984/5/12 | 30.6 | 21.7 | 1.97 | 3.5 | 123 | 89 |
| 2002/5/14 | 21.8 | 18.5 | 3.5 | 3.8 | 31 | 1637 | 100 | 1984/5/13 | 22.6 | 15.4 | 0.5 | 2.8 | 80.6 | 84 |
| 2002/5/15 | 21.3 | 17.9 | 0.42 | 4.8 | 1146 | 1249 | 89 | 1984/5/14 | 22.9 | 13.4 | 0 | 2.8 | 234.5 | 83 |
| 2002/5/16 | 22.2 | 16.1 | 0 | 4.5 | 1172 | 1240 | 82 | 1984/5/15 | 19.8 | 15.3 | 0.34 | 3.3 | 53.2 | 88 |
| 2002/5/17 | 22.8 | 15.8 | 0 | 2.5 | 511 | 1529 | 86 | 1984/5/16 | 22.8 | 14.3 | 0.36 | 2.3 | 290.4 | 68 |
| 2002/5/18 | 20.5 | 15.3 | 0 | 2.8 | 910 | 1401 | 85 | 1984/5/17 | 23.4 | 15.7 | 0 | 2.3 | 285.8 | 61 |
| 2002/5/19 | 24.8 | 14.7 | 0 | 1.5 | 1211 | 1231 | 82 | 1984/5/18 | 24.2 | 13.9 | 0 | 2.5 | 303.1 | 67 |
| 2002/5/20 | 26.5 | 14.9 | 0 | 2.0 | 1209 | 1156 | 73 | 1984/5/19 | 24.8 | 14.6 | 0 | 3.8 | 281.2 | 65 |
| 2002/5/21 | 21.0 | 15.1 | 2.91 | 4.3 | 790 @ | 1200 @ | 94 | 1984/5/20 | 24.3 | 15.2 | 0 | 4.5 | 142.2 | 71 |
| 2002/5/22 | 17.0 | 15.5 | 2.69 | 3.3 | 372 | 1146 | 99 | 1984/5/21 | 20.4 | 15.7 | 0.45 | 4 | 213.8 | 74 |
| 2002/5/23 | 26.1 | 15.2 | 0.04 | 2.3 | 1048 | 1246 | 83 | 1984/5/22 | 21.5 | 15.4 | 0.09 | 4 | 99.8 | 81 |
| 2002/5/24 | 27.7 | 17.8 | 0 | 2.5 | 904 | 1155 | 71 | 1984/5/23 | 23.8 | 16.2 | 0 | 4.3 | 121.9 | 73 |
| 2002/5/25 | 30.0 | 15.3 | 0 | 2.0 | 985 | 1157 | 60 | 1984/5/24 | 21.3 | 17.2 | 0.46 | 4.8 | 0.9 | 95 |
| 2002/5/26 | 30.0 | 17.8 | 0 | 2.5 | 897 | 1136 | 67 | 1984/5/25 | 23 | 18.4 | 1.19 | 2.3 | 163.5 | 89 |
| 2002/5/27 | 29.0 | 17.2 | 0 | 2.5 | 860 | 1108 | 66 | 1984/5/26 | 23.1 | 17.3 | 0 | 0.8 | 82.6 | 85 |
| 2002/5/28 | 28.0 | 18.6 | 0 | 2.5 | 744 | 1314 | 76 | 1984/5/27 | 26.7 | 18.7 | 0 | 1.5 | 217.4 | 82 |
| 2002/5/29 | 26.6 | 19.8 | 0.17 | 3.0 | 215 | 1123 | 89 | 1984/5/28 | 29.4 | 19.6 | 0 | 1.3 | 240.5 | 83 |
| 2002/5/30 | 23.5 | 18.7 | 5.18 | 2.3 | 535 | 1254 | 95 | 1984/5/29 | 29.8 | 20.4 | 0 | 1.8 | 184.4 | 72 |
| 2002/5/31 | 28.2 | 18.1 | 0 | 2.3 | 846 | 1156 | 92 | 1984/5/30 | 26.5 | 20.9 | 0 | 2.8 | 152.3 | 87 |
| 2002/6/1 | 31.0 | 20.7 | 0 | 2.5 | 851 | 1245 | 81 | 1984/5/31 | 25.4 | 18 | 0 | 4 | 144.1 | 81 |
| 2002/6/2 | 32.0 | 18.8 | 0 | 2.5 | 978 | 1241 | 69 | 1984/6/1 | 22.2 | 18.8 | 0.3 | 3 | 16.1 | 88 |
| 2002/6/3 | 32.3 | 19.1 | 0 | 2.5 | 929 | 1222 | 72 | 1984/6/2 | 21 | 18.3 | 0.7 | 1.5 | 115 | 89 |
| 2002/6/4 | 30.9 | 21.6 | 0 | 3.8 | 1050 | 1230 | 79 | 1984/6/3 | 27.2 | 18.4 | 0.09 | 2 | 269.7 | 77 |
| 2002/6/5 | 30.6 | 20.6 | 0 | 3.3 | 896 | 1207 | 76 | 1984/6/4 | 31 | 19.2 | 0 | 3.8 | 255.7 | 81 |
| 2002/6/6 | 30.5 | 20.2 | 0 | 4.3 | 962 | 1129 | 82 | 1984/6/5 | 34.3 | 21.7 | 0 | 3.5 | 274.1 | 71 |
| 2002/6/7 | 30.2 | 22.0 | 0 | 4.8 | 1077 | 1228 | 84 | 1984/6/6 | 34.4 | 22.5 | 1.57 | 3.5 | 210 | 80 |
| 2002/6/8 | 30.6 | 23.2 | 0 | 4.8 | 1251 | 1110 | 82 | 1984/6/7 | 23.9 | 19.2 | 4.56 | 3.3 | 105.3 | 91 |
| 2002/6/9 | 29.6 | 22.5 | 0 | 5.3 | 1247 | 1307 | 85 | 1984/6/8 | 23 | 20.9 | 2.52 | 3.3 | 21.3 | 96 |
| 2002/6/10 | 31.6 | 24.0 | 0.12 | 3.5 | 953 | 1206 | 84 | 1984/6/9 | 25.7 | 21.8 | 1.09 | 2.8 | 100.7 | 85 |
| 2002/6/11 | 33.4 | 24.2 | 0 | 2.8 | 765 | 1316 | 74 | 1984/6/10 | 27 | 18.8 | 0 | 1.5 | 262.5 | 79 |
| 2002/6/12 | 34.6 | 25.1 | 0 | 3.8 | 963 | 1359 | 66 | 1984/6/11 | 28.3 | 19.2 | 0 | 4.5 | 271.5 | 71 |
| 2002/6/13 | 28.2 | 21.2 | 0.3 | 2.0 | 963 | 1154 | 72 | 1984/6/12 | 28.7 | 20.2 | 0 | 3.8 | 166.2 | 83 |
| 2002/6/14 | 31.5 | 19.2 | 0 | 3.0 | 1046 | 1051 | 65 | 1984/6/13 | 24 | 20.3 | 4.03 | 4 | 2.5 | 88 |
| 2002/6/15 | 30.2 | 21.6 | 0 | 3.5 | 1025 | 1213 | 78 | 1984/6/14 | 24.7 | 19.7 | 2 | 4.5 | 33.3 | 89 |
| 2002/6/16 | 30.0 | 21.5 | 0 | 3.0 | 1091 | 1226 | 83 | 1984/6/15 | 24.3 | 20.8 | 0.12 | 2.8 | 30.7 | 92 |
| 2002/6/17 | 32.0 | 21.8 | 0 | 2.3 | 899 | 1225 | 77 | 1984/6/16 | 29.9 | 21.7 | 0 | 3.5 | 223.7 | 81 |
| 2002/6/18 | 33.3 | 22.8 | 0 | 3.3 | 948 | 1311 | 73 | 1984/6/17 | 31.9 | 22.1 | 0 | 3 | 140.2 | 74 |
| 2002/6/19 | 27.3 | 23.0 | 1.44 | 2.0 | 317 | 1224 | 97 | 1984/6/18 | 27.4 | 23.8 | 1.51 | 3 | 110.4 | 87 |
| 2002/6/20 | 26.8 | 25.2 | 2.57 | 1.8 | 406 | 1237 | 99 | 1984/6/19 | 31.2 | 23 | 0 | 2.5 | 207.5 | 82 |
| 2002/6/21 | 25.7 | 23.6 | 0.86 | 3.3 | 228 | 1317 | 98 | **1984/6/20** | **27.3** | **22.3** | **0** | **1.0** | **55.8** | **82** |
| **2002/6/22** | **27.8** | **22.9** | **0** | **3.3** | **634** | **1108** | **91** | **1984/6/21** | **30.4** | **21.5** | **0** | **1.0** | **55.8** | **92** |
| **2002/6/23** | **31.2** | **25.0** | **0.06** | **5.3** | **948** | **1100** | **92** | **1984/6/22** | **31.3** | **24.2** | **0** | **1.0** | **55.8** | **94** |
| **2002/6/24** | **27.5** | **21.5** | **4.52** | **3.5** | **871** | **1432** | **92** | **1984/6/23** | **25** | **20.8** | **0** | **1.0** | **55.8** | **86** |
| **2002/6/25** | **25.4** | **19.9** | **0** | **2.5** | **1339** | **1141** | **86** | **1984/6/24** | **25.9** | **20.6** | **0** | **1.0** | **138.5** | **84** |
| **2002/6/26** | **26.6** | **20.3** | **0** | **2.3** | **927** | **1004** | **84** | **1984/6/25** | **28.8** | **23.2** | **0** | **1.0** | **138.5** | **85** |
| **2002/6/27** | **25.3** | **21.4** | **0** | **3.3** | **495** | **1122** | **93** | **1984/6/26** | **31.2** | **22** | **0** | **1.0** | **138.5** | **77** |
| **2002/6/28** | **23.4** | **20.7** | **1.77** | **4.5** | **121** | **1314** | **97** | 1984/6/27 | 30.7 | 24 | 0.15 | 1.5 | 170.3 | 80 |
| **2002/6/29** | **23.7** | **20.6** | **0** | **2.3** | **465** | **1122** | **98** | 1984/6/28 | 26.2 | 22.3 | 0.87 | 3.5 | 35.8 | 88 |
| 2002/6/30 | 28.6 | 21.4 | 0.03 | 2.5 | 1118 | 1046 | 92 | 1984/6/29 | 25.1 | 21.8 | 1.87 | 3 | 50.7 | 90 |
| 2002/7/1 | 25.5 | 22.1 | 0 | 2.3 | 278 | 1110 | 96 | 1984/6/30 | 28.9 | 23.8 | 0.34 | 1.8 | 179.6 | 87 |
| 2002/7/2 | 28.7 | 21.1 | 0 | 2.5 | 1127 | 1120 | 91 | 1984/7/1 | 33.5 | 24.2 | 0 | 1.8 | 279.7 | 82 |
| 2002/7/3 | 30.7 | 22.5 | 0 | 3.3 | 1161 | 1127 | 92 | 1984/7/2 | 34.4 | 26 | 0 | 2.8 | 247.2 | 80 |
| 2002/7/4 | 26.2 | 23.5 | 1.99 | 5.5 | 367 | 948 | 96 | 1984/7/3 | 33.2 | 26.6 | 0 | 3 | 107.1 | 90 |
| 2002/7/5 | 25.1 | 22.9 | 1.93 | 6.0 | 422 | 1642 | 96 | 1984/7/4 | 29 | 23.3 | 2.32 | 3.5 | 37.4 | 87 |
| 2002/7/6 | 31.7 | 23.5 | 0 | 2.8 | 1007 | 1109 | 82 | 1984/7/5 | 24.4 | 21.6 | 1.05 | 2 | 24.5 | 86 |
| 2002/7/7 | 29.5 | 24.4 | 0.09 | 1.3 | 589 | 1417 | 77 | 1984/7/6 | 31.8 | 24 | 1.79 | 2 | 33.1 | 95 |
| 2002/7/8 | 30.1 | 20.8 | 0 | 1.3 | 771 | 938 | 75 | 1984/7/7 | 33.5 | 24.5 | 0 | 2 | 208.1 | 86 |
| 2002/7/9 | 27.0 | 21.9 | 0 | 2.5 | 205 | 1048 | 91 | 1984/7/8 | 33.8 | 27.2 | 0 | 1.8 | 196.1 | 86 |
| 2002/7/10 | 30.0 | 22.5 | 0 | 2.0 | 1193 | 1133 | 85 | 1984/7/9 | 34.7 | 27.3 | 0 | 2.3 | 159.8 | 88 |
| 2002/7/11 | 32.2 | 23.6 | 0 | 1.8 | 917 | 1201 | 82 | 1984/7/10 | 34.6 | 27.3 | 0 | 1.8 | 232.1 | 88 |
| 2002/7/12 | 32.7 | 24.0 | 0 | 3.0 | 803 | 1158 | 76 | 1984/7/11 | 34.3 | 27.6 | 0 | 1.8 | 220.7 | 85 |
| 2002/7/13 | 33.0 | 21.8 | 0 | 2.5 | 905 | 1121 | 83 | 1984/7/12 | 34.7 | 27.3 | 0 | 3.8 | 236.8 | 76 |
| 2002/7/14 | 36.7 | 25.1 | 0 | 2.0 | 805 | 1211 | 80 | 1984/7/13 | 34.8 | 27.1 | 0 | 2.8 | 265 | 73 |
| 2002/7/15 | 36.6 | 28.5 | 0 | 1.8 | 1129 | 1301 | 80 | 1984/7/14 | 34.3 | 26.3 | 0.04 | 3.8 | 273.8 | 69 |
| 2002/7/16 | 35.5 | 29.2 | 0 | 3.0 | 881 | 1119 | 80 | 1984/7/15 | 34.9 | 26.7 | 0 | 3 | 270.4 | 70 |
| 2002/7/17 | 32.7 | 25.8 | 0.05 | 1.8 | 767 | 1111 | 86 | 1984/7/16 | 34.9 | 26.3 | 0 | 1.8 | 242.4 | 78 |
| 2002/7/18 | 29.1 | 23.1 | 7.96 | 2.5 | 240 | 1018 | 93 | 1984/7/17 | 31.5 | 24.3 | 0 | 3.8 | 281.6 | 81 |
| 2002/7/19 | 30.8 | 23.0 | 0 | 1.8 | 834 | 1125 | 90 | 1984/7/18 | 30.5 | 23.5 | 0 | 4 | 156 | 78 |
| **2002/7/20** | **30.5** | **26.2** | **0** | **1.8** | **372** | **850** | **94** | 1984/7/19 | 29.6 | 23.2 | 0 | 4.5 | 94.4 | 80 |
| **2002/7/21** | **30.8** | **26.0** | **0** | **4.0** | **733** | **1559** | **88** | 1984/7/20 | 31.7 | 25 | 0.64 | 3.8 | 87.5 | 90 |
| **2002/7/22** | **29.4** | **24.5** | **0** | **2.5** | **1046** | **1442** | **94** | 1984/7/21 | 28 | 23.9 | 2.82 | 2.5 | 87.6 | 91 |
| **2002/7/23** | **35.0** | **26.5** | **0.06** | **3.0** | **936** | **1143** | **88** | 1984/7/22 | 29.8 | 22.9 | 0 | 2.8 | 251 | 84 |
| **2002/7/24** | **34.1** | **25.2** | **0** | **3.5** | **927** | **1154** | **83** | 1984/7/23 | 31.5 | 23.3 | 0 | 1 | 159.5 | 81 |
| **2002/7/25** | **32.7** | **25.7** | **0.48** | **1.5** | **834** | **1112** | **86** | 1984/7/24 | 31.7 | 24.5 | 0 | 2.8 | 145.1 | 87 |
| **2002/7/26** | **30.0** | **25.6** | **0** | **2.5** | **1059** | **1210** | **89** | 1984/7/25 | 32.2 | 26.4 | 0 | 2.3 | 84.7 | 94 |
| **2002/7/27** | **32.6** | **24.8** | **0** | **2.8** | **900** | **1145** | **82** | 1984/7/26 | 35.5 | 28.1 | 0 | 3.3 | 249.7 | 82 |
| **2002/7/28** | **34.3** | **26.6** | **0** | **1.8** | **888** | **1335** | **88** | 1984/7/27 | 35.5 | 27.7 | 0 | 2 | 133.6 | 90 |
| **2002/7/29** | **34.8** | **26.8** | **0** | **2.3** | **887** | **1205** | **81** | 1984/7/28 | 31.2 | 24 | 3.07 | 1.5 | 115.5 | 92 |
| 2002/7/30 | 34.0 | 26.4 | 0 | 3.3 | 939 | 1206 | 79 | 1984/7/29 | 32.7 | 25.7 | 0 | 2.3 | 142.5 | 90 |
| 2002/7/31 | 33.8 | 26.2 | 0 | 4.5 | 1074 | 1116 | 83 | 1984/7/30 | 31.6 | 25 | 0 | 3 | 236.2 | 87 |
| 2002/8/1 | 32.4 | 26.8 | 0 | 3.5 | 1148 | 1249 | 87 | 1984/7/31 | 29.4 | 24 | 0.69 | 5.5 | 163.2 | 88 |
| 2002/8/2 | 33.6 | 26.7 | 0 | 3.3 | 1142 | 1210 | 84 | 1984/8/1 | 29.7 | 24.4 | 1.64 | 5.3 | 77.8 | 92 |
| 2002/8/3 | 34.0 | 26.6 | 0 | 4.3 | 1147 | 1225 | 83 | 1984/8/2 | 32.6 | 24.6 | 0 | 2 | 196.1 | 86 |
| 2002/8/4 | 33.6 | 27.0 | 0 | 5.0 | 1127 | 1123 | 80 | 1984/8/3 | 33.2 | 26.8 | 0 | 3.8 | 244.9 | 91 |
| 2002/8/5 | 33.2 | 26.2 | 0 | 4.0 | 1215 | 1212 | 81 | 1984/8/4 | 34.3 | 26.6 | 0 | 3 | 238.9 | 80 |
| 2002/8/6 | 32.2 | 27.7 | 0 | 4.5 | 1244 | 1147 | 80 | 1984/8/5 | 34.7 | 27.1 | 0 | 2.8 | 191.3 | 85 |
| 2002/8/7 | 28.6 | 25.3 | 0.57 | 3.0 | 343 | 1145 | 93 | 1984/8/6 | 33 | 25.6 | 0 | 4.3 | 275.3 | 86 |
| 2002/8/8 | 29.1 | 24.4 | 0.19 | 2.8 | 1005 | 1405 | 86 | 1984/8/7 | 32.7 | 25.6 | 0 | 4.3 | 249.4 | 88 |
| 2002/8/9 | 25.7 | 21.7 | 0.59 | 1.0 | 434 | 1306 | 90 | 1984/8/8 | 31.1 | 26.5 | 0.03 | 5.8 | 79.4 | 90 |
| 2002/8/10 | 28.1 | 20.4 | 1.17 | 1.5 | 945 | 1335 | 83 | 1984/8/9 | 33.1 | 26.8 | 0 | 6.5 | 218.9 | 83 |
| 2002/8/11 | 27.4 | 22.2 | 0.16 | 1.0 | 245 | 1414 | 83 | 1984/8/10 | 32.9 | 26.1 | 0 | 6.5 | 264.9 | 80 |
| 2002/8/12 | 27.8 | 21.5 | 0.1 | 1.5 | 708 | 1402 | 83 | 1984/8/11 | 33.1 | 25.9 | 0 | 4 | 276.4 | 84 |
| 2002/8/13 | 28.0 | 22.7 | 0.11 | 2.0 | 635 | 1130 | 90 | 1984/8/12 | 33.2 | 25.2 | 0 | 4.5 | 256.8 | 83 |
| 2002/8/14 | 27.6 | 22.9 | 0.1 | 3.0 | 869 | 1245 | 95 | 1984/8/13 | 33.2 | 25.6 | 0 | 3.8 | 210.5 | 85 |
| 2002/8/15 | 24.9 | 21.8 | 1.31 | 2.8 | 209 | 1438 | 96 | 1984/8/14 | 31.9 | 23.5 | 0.81 | 2.5 | 96.2 | 89 |
| 2002/8/16 | 23.7 | 22.0 | 2.2 | 3.8 | 1080 | 1136 | 99 | 1984/8/15 | 27.8 | 22.5 | 4.54 | 4.5 | 196.3 | 76 |
| 2002/8/17 | 28.1 | 23.2 | 3.62 | 1.3 | 1007 | 1200 | 97 | 1984/8/16 | 27.8 | 18.9 | 0 | 3.5 | 258.9 | 77 |
| 2002/8/18 | 31.0 | 24.1 | 0 | 1.5 | 829 | 1232 | 86 | 1984/8/17 | 25.7 | 20.6 | 0.67 | 3.3 | 58.1 | 92 |
| 2002/8/19 | 32.0 | 23.4 | 0 | 1.3 | 856 | 1142 | 85 | 1984/8/18 | 31 | 24.1 | 0 | 4.3 | 94.4 | 91 |
| **2002/8/20** | **30.7** | **23.8** | **0** | **2.0** | **916** | **1220** | **86** | 1984/8/19 | 30 | 24.3 | 0 | 4.8 | 230.9 | 87 |
| **2002/8/21** | **31.8** | **23.6** | **0** | **1.5** | **874** | **1214** | **85** | 1984/8/20 | 27.3 | 24.1 | 1.12 | 3.8 | 83.6 | 92 |
| **2002/8/22** | **34.3** | **24.5** | **0** | **2.3** | **872** | **1200** | **83** | 1984/8/21 | 31.4 | 22.9 | 0 | 2.8 | 218.4 | 89 |
| **2002/8/23** | **36.1** | **27.6** | **0** | **2.3** | **834** | **1201** | **81** | 1984/8/22 | 32.9 | 24.8 | 0 | 2.5 | 226 | 81 |
| **2002/8/24** | **33.5** | **25.5** | **0.23** | **1.5** | **858** | **1223** | **81** | 1984/8/23 | 31.9 | 25.1 | 0.36 | 2.8 | 131.9 | 85 |
| **2002/8/25** | **31.7** | **24.5** | **0.19** | **1.8** | **995** | **1052** | **84** | 1984/8/24 | 32.5 | 25.2 | 0 | 2 | 178.7 | 86 |
| **2002/8/26** | **30.2** | **23.2** | **1.8** | **2.5** | **953** | **1227** | **94** | 1984/8/25 | 30.6 | 24.4 | 0 | 3.5 | 87.4 | 86 |
| **2002/8/27** | **30.2** | **23.9** | **0.58** | **1.8** | **792** | **1319** | **91** | 1984/8/26 | 30.7 | 24.4 | 0 | 3 | 191 | 92 |
| **2002/8/28** | **30.3** | **23.7** | **0** | **2.5** | **821** | **1117** | **87** | 1984/8/27 | 31.3 | 23.4 | 0 | 2.3 | 193.5 | 88 |
| **2002/8/29** | **30.5** | **24.9** | **0** | **2.0** | **957** | **1202** | **89** | 1984/8/28 | 32.8 | 25.1 | 0 | 1 | 234.8 | 84 |
| **2002/8/30** | **29.8** | **24.9** | **0.27** | **4.3** | **1080** | **1128** | **85** | 1984/8/29 | 31.7 | 24.9 | 0 | 3.3 | 149.4 | 86 |
| **2002/8/31** | **31.9** | **24.3** | **0** | **4.0** | **956** | **1112** | **82** | 1984/8/30 | 31.7 | 24.7 | 2.04 | 4.3 | 161.1 | 91 |
| 2002/9/1 | 34.1 | 23.1 | 0 | 2.5 | 915 | 1147 | 75 | 1984/8/31 | 30.8 | 24.6 | 1.1 | 3 | 50 | 96 |
| 2002/9/2 | 34.7 | 25.1 | 0 | 2.0 | 758 | 1114 | 70 | 1984/9/1 | 30.2 | 22 | 4.26 | 2.8 | 0.6 | 97 |
| 2002/9/3 | 35.1 | 23.5 | 0 | 1.5 | 805 | 1224 | 70 | 1984/9/2 | 22.7 | 20.2 | 6.52 | 3.3 | 0 | 94 |
| 2002/9/4 | 32.3 | 24.0 | 0 | 2.5 | 779 | 1207 | 82 | 1984/9/3 | 26 | 20 | 0.52 | 1.8 | 253.6 | 73 |
| 2002/9/5 | 30.4 | 24.8 | 0 | 4.5 | 953 | 1126 | 79 | 1984/9/4 | 28.3 | 17.6 | 0 | 1.5 | 214.7 | 78 |
| 2002/9/6 | 27.9 | 21.5 | 0 | 4.3 | 859 | 1002 | 73 | 1984/9/5 | 28.7 | 20.7 | 0 | 2.3 | 184.6 | 81 |
| 2002/9/7 | 28.8 | 22.2 | 0.03 | 5.0 | 1018 | 1013 | 85 | 1984/9/6 | 30.6 | 22.4 | 2.31 | 2.3 | 63.1 | 94 |
| 2002/9/8 | 31.3 | 25.0 | 0 | 5.5 | 1000 | 1135 | 87 | 1984/9/7 | 28.1 | 21.7 | 3.29 | 1.8 | 106.6 | 94 |
| 2002/9/9 | 33.7 | 25.8 | 0.5 | 2.8 | 930 | 1152 | 88 | 1984/9/8 | 32.2 | 23.5 | 0 | 2.5 | 199 | 90 |
| 2002/9/10 | 31.3 | 24.7 | 0 | 2.8 | 878 | 1158 | 88 | 1984/9/9 | 27.3 | 20.7 | 1.42 | 2.8 | 10.8 | 94 |
| 2002/9/11 | 29.8 | 21.8 | 0 | 2.8 | 639 | 1138 | 81 | 1984/9/10 | 21.3 | 16.4 | 2.98 | 3.3 | 2.3 | 91 |
| 2002/9/12 | 29.4 | 21.6 | 0 | 2.8 | 857 | 1316 | 79 | 1984/9/11 | 19.7 | 17 | 0.46 | 1.5 | 12 | 78 |
| 2002/9/13 | 27.7 | 23.0 | 0.1 | 2.8 | 957 | 1044 | 81 | 1984/9/12 | 20.9 | 16.4 | 0.01 | 2 | 64.2 | 84 |
| 2002/9/14 | 24.4 | 19.3 | 1.44 | 3.3 | 211 | 1158 | 89 | 1984/9/13 | 26.3 | 14.8 | 0 | 1.3 | 123.4 | 81 |
| 2002/9/15 | 21.0 | 19.4 | 5.24 | 3.8 | 478 | 1019 | 100 | 1984/9/14 | 26.4 | 16.1 | 0.48 | 1.3 | 185.1 | 82 |
| 2002/9/16 | 25.4 | 19.8 | 0.64 | 3.5 | 1189 | 1200 | 85 | 1984/9/15 | 27.5 | 16.6 | 0 | 1 | 197.3 | 82 |
| 2002/9/17 | 26.1 | 18.7 | 0 | 2.5 | 1042 | 1110 | 79 | 1984/9/16 | 26.6 | 19 | 0 | 2.3 | 224 | 83 |
| 2002/9/18 | 27.1 | 19.1 | 0 | 2.0 | 995 | 1031 | 82 | 1984/9/17 | 26.2 | 19.6 | 0 | 2 | 200.9 | 83 |
| 2002/9/19 | 27.4 | 19.8 | 0 | 2.8 | 848 | 1201 | 76 | 1984/9/18 | 26.5 | 17.9 | 0.02 | 1 | 106.8 | 84 |
| 2002/9/20 | 26.7 | 18.5 | 0 | 2.5 | 1067 | 1120 | 74 | 1984/9/19 | 27.4 | 19.2 | 0 | 0.8 | 172.9 | 86 |
| 2002/9/21 | 25.9 | 20.1 | 0 | 3.8 | 791 | 1230 | 75 | 1984/9/20 | 27.3 | 18.2 | 0 | 2.5 | 190.4 | 82 |
| 2002/9/22 | 25.2 | 17.6 | 0 | 3.5 | 971 | 1328 | 69 | 1984/9/21 | 27.9 | 19.6 | 0 | 2.5 | 209.1 | 83 |
| 2002/9/23 | 27.6 | 15.5 | 0 | 2.0 | 809 | 1149 | 63 | 1984/9/22 | 27.9 | 19.5 | 0 | 3.3 | 180.1 | 81 |
| 2002/9/24 | 27.2 | 16.0 | 0 | 1.0 | 722 | 1050 | 74 | 1984/9/23 | 27.4 | 19.6 | 0 | 2.5 | 202.8 | 80 |
| 2002/9/25 | 23.9 | 19.6 | 0 | 1.8 | 289 | 950 | 76 | 1984/9/24 | 29.1 | 19.9 | 0 | 3 | 187.8 | 81 |
| 2002/9/26 | 26.8 | 17.0 | 0 | 1.8 | 1038 | 1113 | 73 | 1984/9/25 | 26.2 | 19.5 | 0 | 4 | 16.6 | 92 |
| 2002/9/27 | 25.1 | 18.4 | 0 | 1.5 | 886 | 1101 | 80 | 1984/9/26 | 22.9 | 19.1 | 0 | 3.5 | 23.4 | 87 |
| 2002/9/28 | 27.4 | 19.6 | 0 | 2.8 | 698 | 1132 | 72 | 1984/9/27 | 27.3 | 17.4 | 0 | 2.8 | 199.3 | 87 |
| 2002/9/29 | 26.4 | 17.0 | 0 | 1.3 | 694 | 1235 | 69 | 1984/9/28 | 26.9 | 20 | 0.01 | 2.3 | 54.9 | 91 |
| 2002/9/30 | 26.8 | 15.2 | 0 | 1.3 | 747 | 1119 | 72 | 1984/9/29 | 24.3 | 17.4 | 0 | 1.5 | 152.3 | 81 |
| 2002/10/1 | 28.3 | 17.4 | 0 | 1.5 | 785 | 1120 | 70 | 1984/9/30 | 27.8 | 19.5 | 0 | 2.3 | 183.9 | 85 |
| 2002/10/2 | 27.4 | 15.9 | 0 | 2.8 | 801 | 1121 | 62 | 1984/10/1 | 31.6 | 21.3 | 0 | 2.5 | 154.6 | 96 |
| 2002/10/3 | 31.3 | 18.9 | 0 | 3.0 | 730 | 1101 | 68 | 1984/10/2 | 27.7 | 20.5 | 0 | 2.5 | 33.1 | 97 |
| 2002/10/4 | 32.2 | 19.9 | 0 | 1.8 | 608 | 1142 | 71 | 1984/10/3 | 21 | 15.1 | 1.29 | 2.8 | 26.5 | 80 |
| 2002/10/5 | 30.5 | 20.6 | 0 | 2.8 | 837 | 1138 | 72 | 1984/10/4 | 20.8 | 13.6 | 0.02 | 1.8 | 214.5 | 59 |
| 2002/10/6 | 24.9 | 18.2 | 1.12 | 2.5 | 374 | 1053 | 71 | 1984/10/5 | 20.6 | 13.9 | 0.08 | 1.8 | 96.2 | 73 |
| 2002/10/7 | 22.6 | 13.3 | 0 | 2.3 | 718 | 1203 | 54 | 1984/10/6 | 23.1 | 14.5 | 0.06 | 1.8 | 165 | 75 |
| 2002/10/8 | 22.5 | 11.9 | 0 | 1.5 | 766 | 1223 | 64 | 1984/10/7 | 23.1 | 14.2 | 0 | 2.8 | 119.4 | 76 |
| 2002/10/9 | 23.4 | 12.7 | 0 | 1.5 | 1025 | 1154 | 72 | 1984/10/8 | 23.3 | 16.9 | 0 | 3.3 | 82.3 | 78 |
| 2002/10/10 | 24.4 | 14.6 | 0 | 2.5 | 893 | 1044 | 75 | 1984/10/9 | 19.9 | 16.3 | 0.68 | 3 | 0.5 | 90 |
| 2002/10/11 | 25.9 | 16.0 | 0 | 2.5 | 891 | 1039 | 83 | 1984/10/10 | 23.6 | 13.9 | 0 | 2.8 | 194 | 80 |
| 2002/10/12 | 28.6 | 18.1 | 0 | 1.5 | 724 | 1048 | 86 | 1984/10/11 | 23.9 | 13.1 | 0 | 2 | 227.4 | 79 |
| 2002/10/13 | 26.4 | 18.8 | 0 | 2.0 | 823 | 1054 | 84 | 1984/10/12 | 22.5 | 14.3 | 0 | 2 | 56 | 91 |
| 2002/10/14 | 26.7 | 17.2 | 0 | 2.0 | 641 | 1212 | 86 | 1984/10/13 | 19.6 | 15.7 | 0.26 | 2.3 | 126.2 | 74 |
| 2002/10/15 | 27.6 | 19.5 | 0 | 2.0 | 589 | 1136 | 71 | 1984/10/14 | 20.4 | 13.9 | 0 | 1.3 | 73.5 | 81 |
| 2002/10/16 | 27.4 | 16.1 | 0 | 2.8 | 703 | 1106 | 80 | 1984/10/15 | 21.4 | 14.9 | 0 | 0.3 | 119.4 | 82 |
| 2002/10/17 | 26.3 | 19.8 | 0.12 | 4.5 | 716 | 1126 | 89 | 1984/10/16 | 23.5 | 15.2 | 0 | 0.8 | 117 | 83 |
| 2002/10/18 | 22.5 | 18.1 | 2.31 | 4.0 | 715 | 1029 | 96 | 1984/10/17 | 23.5 | 15.2 | 0 | 0.8 | 118.9 | 80 |
| 2002/10/19 | 18.7 | 17.7 | 0.7 | 4.5 | 374 | 1200 | 94 | 1984/10/18 | 23.9 | 16.3 | 0 | 1.8 | 145.8 | 77 |
| 2002/10/20 | 18.2 | 16.6 | 0.86 | 3.3 | 379 | 1119 | 98 | 1984/10/19 | 25.3 | 12.8 | 0 | 3.3 | 185.8 | 70 |
| 2002/10/21 | 16.9 | 12.8 | 0.12 | 4.0 | 826 | 1058 | 81 | 1984/10/20 | 18.8 | 9.3 | 0 | 3.3 | 205.3 | 62 |
| 2002/10/22 | 16.4 | 10.5 | 0 | 3.0 | 919 | 1144 | 69 | 1984/10/21 | 20.6 | 7.3 | 0 | 1.5 | 196.8 | 63 |
| 2002/10/23 | 16.2 | 11.7 | 0 | 1.8 | 677 | 1258 | 69 | 1984/10/22 | 23.5 | 8.5 | 0 | 2.8 | 191.9 | 70 |
| 2002/10/24 | 19.0 | 9.8 | 0 | 1.8 | 657 | 1219 | 76 | 1984/10/23 | 23.5 | 11.2 | 0 | 0.3 | 136.5 | 72 |
| 2002/10/25 | 21.8 | 9.7 | 0 | 1.8 | 762 | 1201 | 78 | 1984/10/24 | 24.5 | 15.7 | 0 | 2 | 192.1 | 72 |
| 2002/10/26 | 18.5 | 9.7 | 0 | 4.8 | 715 | 1154 | 64 | 1984/10/25 | 25.1 | 14.9 | 0.01 | 1.8 | 141.6 | 94 |
| 2002/10/27 | 17.6 | 4.7 | 0 | 1.5 | 722 | 1154 | 61 | 1984/10/26 | 24.5 | 14.4 | 0 | 1 | 187.2 | 93 |
| 2002/10/28 | 19.5 | 9.1 | 0 | 1.8 | 606 | 1139 | 77 | 1984/10/27 | 20.7 | 13.4 | 0 | 2.3 | 138.5 | 73 |
| 2002/10/29 | 16.5 | 13.2 | 0 | 3.8 | 226 | 1148 | 79 | 1984/10/28 | 19.9 | 10.7 | 0 | 2 | 178.5 | 77 |
| 2002/10/30 | 16.1 | 12.1 | 0.43 | 2.5 | 321 | 1304 | 87 | 1984/10/29 | 17.9 | 9.3 | 0 | 2.8 | 190.9 | 63 |
| 2002/10/31 | 16.4 | 14.0 | 2.52 | 4.5 | 546 @ | 1200 @ | 98 | 1984/10/30 | 18.3 | 9.5 | 0 | 2.3 | 187.2 | 65 |
| 2002/11/1 | 16.0 | 11.0 | 0.02 | 3.3 | 770 | 1137 | 74 | 1984/10/31 | 19.3 | 8.8 | 0 | 1.8 | 168.9 | 71 |
| 2002/11/2 | 14.7 | 6.8 | 0 | 3.0 | 644 | 1131 | 52 | 1984/11/1 | 18.8 | 12.6 | 0 | 0.8 | 90.5 | 69 |
| 2002/11/3 | 13.9 | 8.1 | 0 | 4.5 | 627 | 1152 | 50 | 1984/11/2 | 17.4 | 11.6 | 0 | 1.5 | 83.8 | 78 |
| 2002/11/4 | 16.9 | 5.4 | 0 | 2.5 | 644 | 1127 | 45 | 1984/11/3 | 20.2 | 10.3 | 0 | 2 | 174.3 | 79 |
| 2002/11/5 | 19.1 | 9.7 | 0 | 2.5 | 686 | 1115 | 58 | 1984/11/4 | 22.2 | 10.4 | 0 | 3 | 173.4 | 73 |
| 2002/11/6 | 21.5 | 8.4 | 0 | 2.8 | 670 | 1238 | 77 | 1984/11/5 | 23.6 | 11.6 | 0 | 3.3 | 169.3 | 72 |
| 2002/11/7 | 22.4 | 13.5 | 0 | 3.3 | 624 | 1227 | 76 | 1984/11/6 | 26.2 | 14.7 | 0 | 1.5 | 146.6 | 84 |
| 2002/11/8 | 15.5 | 8.9 | 0 | 3.8 | 640 | 1148 | 56 | 1984/11/7 | 25.5 | 14.2 | 0 | 1.3 | 125.8 | 90 |
| 2002/11/9 | 13.9 | 5.1 | 0 | 2.0 | 676 | 1136 | 56 | 1984/11/8 | 21.7 | 15.3 | 0 | 0.8 | 87.4 | 92 |
| 2002/11/10 | 20.5 | 9.4 | 0 | 3.8 | 617 | 1023 | 65 | 1984/11/9 | 19.3 | 15.9 | 0 | 2 | 25.5 | 96 |
| 2002/11/11 | 23.4 | 14.4 | 0 | 2.3 | 467 | 1200 | 71 | 1984/11/10 | 20.3 | 18 | 0.88 | 1.8 | 0 | 98 |
| 2002/11/12 | 20.6 | 11.5 | 0 | 2.0 | 465 | 1212 | 80 | 1984/11/11 | 19.1 | 14.4 | 1.14 | 3.3 | 14.6 | 90 |
| 2002/11/13 | 16.4 | 13.7 | 0 | 4.0 | 269 | 1221 | 79 | 1984/11/12 | 16.9 | 13.8 | 0 | 2.8 | 44.2 | 75 |
| 2002/11/14 | 16.7 | 13.9 | 0 | 3.5 | 208 @ | 1200 @ | 85 | 1984/11/13 | 15.3 | 12.9 | 0.02 | 3.5 | 17.4 | 84 |
| 2002/11/15 | 14.4 | 11.1 | 0.21 | 3.3 | 147 | 1233 | 74 | 1984/11/14 | 19 | 13.7 | 0.33 | 2.5 | 5.8 | 97 |
| 2002/11/16 | 16.0 | 7.3 | 0 | 2.3 | 595 | 1239 | 68 | 1984/11/15 | 15.5 | 12.5 | 0.15 | 2.5 | 36.8 | 92 |
| 2002/11/17 | 13.7 | 7.8 | 0 | 2.5 | 529 | 1112 | 83 | 1984/11/16 | 19.2 | 8.5 | 0 | 1 | 168.4 | 89 |
| 2002/11/18 | 10.0 | 3.5 | 0 | 3.3 | 693 | 1120 | 65 | 1984/11/17 | 18.6 | 11.9 | 0 | 2 | 122.1 | 82 |
| 2002/11/19 | 15.7 | 2.9 | 0 | 3.8 | 608 | 1149 | 72 | 1984/11/18 | 20.4 | 10 | 0 | 1.3 | 135.6 | 85 |
| 2002/11/20 | 14.1 | 11.2 | 0.84 | 2.3 | 15 | 1126 | 92 | 1984/11/19 | 15.4 | 4.9 | 0 | 5.5 | 45 | 75 |
| 2002/11/21 | 12.2 | 10.6 | 0.7 | 3.5 | 174 @ | 1200 @ | 86 | 1984/11/20 | 8.2 | 4.1 | 0 | 3.3 | 97.2 | 74 |
| 2002/11/22 | 13.1 | 8.8 | 0 | 2.0 | 332 | 827 | 74 | 1984/11/21 | 12.1 | 6.9 | 0 | 3 | 69 | 72 |
| 2002/11/23 | 14.3 | 6.9 | 0 | 2.3 | 583 | 1140 | 79 | 1984/11/22 | 15.1 | 7.2 | 0 | 1.5 | 93.4 | 83 |
| 2002/11/24 | 11.3 | 8.5 | 0 | 2.5 | 392 | 935 | 82 | 1984/11/23 | 15.1 | 6.2 | 0 | 1 | 147.2 | 83 |
| 2002/11/25 | 11.7 | 2.8 | 0 | 2.5 | 587 | 1221 | 82 | 1984/11/24 | 11.9 | 6.6 | 0 | 2.8 | 18.5 | 80 |
| 2002/11/26 | 10.5 | 4.7 | 0 | 4.0 | 626 | 1218 | 49 | 1984/11/25 | 11.1 | 3.8 | 0 | 2.3 | 148.1 | 75 |
| 2002/11/27 | 11.6 | –1.4 | 0 | 1.5 | 579 | 1227 | 55 | 1984/11/26 | 13.9 | 3.2 | 0 | 0.5 | 137.8 | 80 |
| 2002/11/28 | 18.0 | 4.8 | 0 | 2.5 | 565 | 1201 | 68 | 1984/11/27 | 9.2 | 6.3 | 0 | 3.3 | 31.7 | 74 |
| 2002/11/29 | 18.9 | 6.7 | 0 | 1.5 | 434 | 1359 | 84 | 1984/11/28 | 10.5 | 2.4 | 0 | 1 | 94.3 | 80 |
| 2002/11/30 | 16.1 | 8.7 | 0 | 1.8 | 420 | 1329 | 90 | 1984/11/29 | 14.9 | 2 | 0 | 0.3 | 139 | 82 |
| 2002/12/1 | 16.1 | 4.4 | 0 | 2.0 | 586 | 1123 | 87 | 1984/11/30 | 16.7 | 3.1 | 0 | 1.5 | 123 | 81 |
| 2002/12/2 | 16.7 | 11.0 | 0.07 | 4.0 | 378 | 1416 | 84 | 1984/12/1 | 14.1 | 3.4 | 0 | 2 | 144.6 | 73 |
| 2002/12/3 | 15.1 | 12.0 | 1.07 | 5.0 | 427 | 1150 | 94 | 1984/12/2 | 13.2 | 0.3 | 0 | 2.5 | 152.1 | 69 |
| 2002/12/4 | 14.5 | 11.3 | 0 | 2.8 | 653 | 1212 | 87 | 1984/12/3 | 16.1 | 5.6 | 0 | 3.5 | 153.1 | 76 |
| 2002/12/5 | 13.8 | 9.7 | 0.77 | 3.5 | 84 | 905 | 95 | 1984/12/4 | 13.1 | 7 | 0 | 2.8 | 60.6 | 89 |
| 2002/12/6 | 11.6 | 8.0 | 0.74 | 4.8 | 102 | 1050 | 91 | 1984/12/5 | 7.4 | 2.6 | 0 | 2.8 | 46.5 | 69 |
| 2002/12/7 | 9.3 | 5.8 | 1.04 | 4.5 | 137 | 1158 | 90 | 1984/12/6 | 10.3 | –0.6 | 0 | 0.3 | 154.1 | 71 |
| 2002/12/8 | 5.8 | 0.9 | 0.05 | 5.3 | 665 | 1150 | 76 | 1984/12/7 | 14.4 | 2.9 | 0 | 3 | 122.9 | 78 |
| 2002/12/9 | 4.0 | –1.4 | 0 | 3.5 | 570 | 1206 | 68 | 1984/12/8 | 17.8 | 5.7 | 0 | 2 | 129.6 | 82 |
| 2002/12/10 | 6.6 | –2.1 | 0 | 0.8 | 519 | 1109 | 78 | 1984/12/9 | 12.2 | 7.8 | 0.04 | 1.8 | 13 | 97 |
| 2002/12/11 | 8.5 | –0.2 | 0 | 1.3 | 591 | 1138 | 77 | 1984/12/10 | 10.3 | 5.9 | 0 | 1.3 | 19.3 | 90 |
| 2002/12/12 | 9.0 | 2.3 | 0 | 1.5 | 507 | 1228 | 72 | 1984/12/11 | 11.3 | 6.9 | 0.01 | 2 | 28.9 | 81 |
| 2002/12/13 | 10.4 | 2.7 | 0 | 1.5 | 506 | 1149 | 72 | 1984/12/12 | 10.4 | 7.5 | 0 | 1.8 | 28.4 | 80 |
| 2002/12/14 | 14.7 | 2.9 | 0 | 3.8 | 586 | 1123 | 81 | 1984/12/13 | 9.9 | 8.4 | 0.98 | 0.8 | 2.4 | 94 |
| 2002/12/15 | 18.0 | 7.6 | 0 | 1.8 | 378 | 1416 | 84 | 1984/12/14 | 10.4 | 7.7 | 2.28 | 4.3 | 0 | 93 |
| 2002/12/16 | 13.4 | 5.7 | 0 | 3.8 | 427 | 1150 | 80 | 1984/12/15 | 9.5 | 7.2 | 1.07 | 3.5 | 7.4 | 89 |
| 2002/12/17 | 7.5 | 3.6 | 2.09 | 2.0 | 107 | 1200 | 89 | 1984/12/16 | 7.9 | 5.7 | 1.54 | 3 | 19.9 | 87 |
| 2002/12/18 | 9.0 | 7.3 | 2.05 | 4.5 | 342 @ | 1200 @ | 97 | 1984/12/17 | 6.9 | 1.2 | 0.45 | 2.5 | 42 | 87 |
| 2002/12/19 | 11.4 | 7.6 | 0.45 | 5.3 | 577 | 1212 | 86 | 1984/12/18 | 3.1 | –1.1 | 0.65 | 2.5 | 87.4 | 72 |
| 2002/12/20 | 11.5 | 7.7 | 0.07 | 5.0 | 200 | 1102 | 87 | 1984/12/19 | 1.5 | –1.8 | 0 | 1.8 | 52.1 | 66 |
| 2002/12/21 | 13.0 | 9.4 | 0.14 | 4.3 | 179 | 1408 | 87 | 1984/12/20 | 3.7 | –2.8 | 0 | 1.3 | 104.5 | 69 |
| 2002/12/22 | 10.2 | 8.2 | 0 | 4.3 | 680 | 1248 | 85 | 1984/12/21 | 3.8 | 0.2 | 0 | 2.8 | 66.7 | 64 |
| 2002/12/23 | 8.6 | 6.8 | 0.3 | 3.0 | 46 | 1045 | 95 | 1984/12/22 | 0.6 | –3.7 | 0 | 2.8 | 119.2 | 50 |
| 2002/12/24 | 6.8 | 3.0 | 0.09 | 3.3 | 59 | 1227 | 85 | 1984/12/23 | 0.6 | –3.9 | 0 | 2.8 | 109 | 53 |
| 2002/12/25 | 3.2 | –1.3 | 0 | 4.5 | 196 | 1312 | 67 | 1984/12/24 | 0.5 | –6.0 | 0 | 2 | 120.9 | 50 |
| 2002/12/26 | 0.8 | –3.6 | 0 | 4.5 | 550 | 1144 | 54 | 1984/12/25 | 2.9 | –6.2 | 0 | 0.5 | 129.3 | 66 |
| 2002/12/27 | 3.4 | –2.4 | 0 | 2.5 | 536 | 1203 | 52 | 1984/12/26 | 2.7 | –4.1 | 0 | 1.5 | 99.4 | 62 |
| 2002/12/28 | 6.0 | –3.3 | 0 | 1.0 | 422 | 1059 | 54 | 1984/12/27 | 3.1 | –5.2 | 0 | 2.5 | 111.5 | 58 |
| 2002/12/29 | 6.1 | 1.3 | 0 | 1.3 | 335 | 1055 | 45 | 1984/12/28 | 2.3 | –4.8 | 0 | 2.8 | 112 | 53 |
| 2002/12/30 | 7.4 | 1.9 | 0 | 1.8 | 177 | 1123 | 63 | 1984/12/29 | 1.9 | –7.0 | 0 | 1.3 | 141.7 | 56 |
| 2002/12/31 | 5.4 | –0.1 | 0 | 2.5 | 415 | 1212 | 72 | 1984/12/30 | 5.1 | –6.2 | 0 | 0 | 102.2 | 64 |
|  |  |  |  |  |  |  |  | 1984/12/31 | 8.2 | –3.0 | 0 | 2 | 134.7 | 61 |
| FQP | | | | | | | | YTA | | | | | | |
| Date | *T*max | *T*min | *P* | *W* | *R*ave | RH |  | Date | *T*max | *T*min | *P* | *W* | *R*ave | RH |
| 1986/1/1 | 3.6 | –6.4 | 0 | 0.8 | 139.0 | 89 |  | 1992/1/1 | 5.8 | 1.6 | 0 | 1.3 | 30.8 | 85 |
| 1986/1/2 | 3.1 | –4.2 | 0 | 3.5 | 70.4 | 91 |  | 1992/1/2 | 8.6 | 3.4 | 0 | 0.3 | 36.6 | 82 |
| 1986/1/3 | 9.4 | –2.1 | 0 | 6.8 | 125.7 | 32 |  | 1992/1/3 | 7.8 | 3.3 | 1.47 | 1.0 | 0.0 | 97 |
| 1986/1/4 | –2.0 | –8.1 | 0 | 1.0 | 131.8 | 35 |  | 1992/1/4 | 8.0 | 3.8 | 0.37 | 2.8 | 5.7 | 87 |
| 1986/1/5 | 3.7 | –8.2 | 0 | 2.8 | 144.8 | 49 |  | 1992/1/5 | 7.1 | 5.2 | 2.21 | 1.8 | 0.0 | 97 |
| 1986/1/6 | 8.4 | –6.9 | 0 | 3.0 | 106.9 | 54 |  | 1992/1/6 | 8.5 | 5.1 | 0.04 | 1.8 | 23.4 | 81 |
| 1986/1/7 | 7.8 | –1.4 | 0 | 3.5 | 141.4 | 41 |  | 1992/1/7 | 8.4 | 2.9 | 0 | 1.8 | 84.0 | 86 |
| 1986/1/8 | 8.1 | –5.9 | 0 | 3.3 | 148.6 | 51 |  | 1992/1/8 | 7.2 | 3.5 | 0.02 | 2.0 | 27.0 | 87 |
| 1986/1/9 | 6.6 | –4.7 | 0 | 1.8 | 131.7 | 56 |  | 1992/1/9 | 9.9 | –0.8 | 0 | 0.8 | 153.2 | 85 |
| 1986/1/10 | 4.1 | –5.9 | 0 | 2.5 | 118.3 | 60 |  | 1992/1/10 | 7.1 | 2.6 | 0 | 2.8 | 125.5 | 72 |
| 1986/1/11 | 3.3 | –4.7 | 0 | 1.8 | 106.8 | 77 |  | 1992/1/11 | 12.5 | 2.5 | 0 | 0.8 | 84.6 | 68 |
| 1986/1/12 | 4.5 | –5.3 | 0 | 2.0 | 116.8 | 70 |  | 1992/1/12 | 8.3 | 2.6 | 0.15 | 1.3 | 135.3 | 89 |
| 1986/1/13 | 3.6 | –8.2 | 0 | 2.3 | 91.0 | 51 |  | 1992/1/13 | 9.8 | 4.6 | 0.14 | 1.5 | 34.8 | 82 |
| 1986/1/14 | 3.5 | –1.5 | 0 | 3.8 | 116.7 | 67 |  | 1992/1/14 | 7.4 | –0.3 | 0 | 1.3 | 152.3 | 59 |
| 1986/1/15 | 12.5 | –4.3 | 0 | 3.8 | 141.0 | 65 |  | 1992/1/15 | 7.5 | –2.5 | 0 | 0.8 | 164.1 | 67 |
| 1986/1/16 | 11.4 | –3.7 | 0 | 1.3 | 109.5 | 69 |  | 1992/1/16 | 11.5 | –1.6 | 0 | 0.5 | 136.0 | 68 |
| 1986/1/17 | 6.3 | 2.4 | 0 | 1.8 | 30.9 | 79 |  | 1992/1/17 | 12.0 | –1.2 | 0 | 0.0 | 160.6 | 70 |
| 1986/1/18 | 7.1 | –1.0 | 0 | 3.0 | 127.7 | 62 |  | 1992/1/18 | 11.3 | 3.0 | 0 | 3.5 | 152.3 | 43 |
| 1986/1/19 | 8.0 | –2.3 | 0 | 3.3 | 124.1 | 94 |  | 1992/1/19 | 7.6 | 4.1 | 0 | 2.8 | 95.7 | 52 |
| 1986/1/20 | 3.6 | –1.0 | 0 | 4.0 | 35.5 | 92 |  | 1992/1/20 | 6.3 | 2.0 | 0.36 | 0.5 | 28.2 | 87 |
| 1986/1/21 | –0.1 | –3.8 | 0 | 4.5 | 53.9 | 64 |  | 1992/1/21 | 10.9 | 2.6 | 0 | 0.3 | 159.1 | 81 |
| 1986/1/22 | 6.3 | –6.4 | 0 | 2.8 | 151.0 | 64 |  | 1992/1/22 | 13.0 | –0.4 | 0 | 0.5 | 115.6 | 80 |
| 1986/1/23 | 9.1 | –5.0 | 0 | 3.3 | 163.9 | 27 |  | 1992/1/23 | 14.8 | 3.5 | 0 | 0.5 | 72.1 | 74 |
| 1986/1/24 | 8.0 | –5.0 | 0 | 1.0 | 122.5 | 45 |  | 1992/1/24 | 14.7 | 2.2 | 0 | 1.5 | 80.3 | 72 |
| 1986/1/25 | 7.0 | –2.3 | 0 | 2.5 | 144.2 | 57 |  | 1992/1/25 | 16.4 | 7.5 | 0.22 | 1.0 | 88.4 | 76 |
| 1986/1/26 | 6.7 | –3.8 | 0 | 1.8 | 150.8 | 56 |  | 1992/1/26 | 16.0 | 4.7 | 0 | 1.0 | 141.9 | 79 |
| 1986/1/27 | 7.7 | –7.1 | 0 | 3.0 | 148.3 | 61 |  | 1992/1/27 | 18.7 | 3.5 | 0 | 0.5 | 145.8 | 73 |
| 1986/1/28 | 9.8 | –3.1 | 0 | 2.0 | 81.0 | 66 |  | 1992/1/28 | 20.2 | 9.5 | 0 | 2.0 | 147.7 | 61 |
| 1986/1/29 | 11.8 | –2.0 | 0 | 1.8 | 119.3 | 63 |  | 1992/1/29 | 20.3 | 13.1 | 0 | 2.0 | 150.9 | 63 |
| 1986/1/30 | 6.5 | 0.8 | 0 | 4.3 | 71.1 | 56 |  | 1992/1/30 | 18.0 | 9.3 | 1.46 | 1.3 | 112.8 | 83 |
| 1986/1/31 | 4.0 | –3.5 | 0 | 1.8 | 107.4 | 66 |  | 1992/1/31 | 10.0 | 4.6 | 1.45 | 2.5 | 96.4 | 82 |
| 1986/2/1 | 8.2 | –4.2 | 0 | 3.8 | 143.8 | 63 |  | 1992/2/1 | 8.5 | –0.1 | 0 | 3.3 | 188.1 | 64 |
| 1986/2/2 | 2.3 | –1.9 | 0 | 4.3 | 105.9 | 49 |  | 1992/2/2 | 7.9 | 4.2 | 0.34 | 2.5 | 75.2 | 75 |
| 1986/2/3 | 4.3 | –7.7 | 0 | 1.5 | 167.4 | 40 |  | 1992/2/3 | 8.2 | 3.5 | 3.62 | 2.8 | 30.9 | 96 |
| 1986/2/4 | 4.9 | –4.6 | 0 | 2.5 | 84.7 | 46 |  | 1992/2/4 | 4.4 | 3.0 | 1.37 | 2.0 | 10.6 | 94 |
| 1986/2/5 | 5.3 | –3.5 | 0 | 2.3 | 146.9 | 42 |  | 1992/2/5 | 8.1 | 2.5 | 0.01 | 2.0 | 28.1 | 76 |
| 1986/2/6 | 4.3 | –8.6 | 0 | 1.5 | 169.1 | 43 |  | 1992/2/6 | 10.4 | 2.9 | 0 | 0.3 | 89.6 | 82 |
| 1986/2/7 | 6.1 | –6.3 | 0 | 2.5 | 155.6 | 45 |  | 1992/2/7 | 8.7 | 2.6 | 1.89 | 3.3 | 56.2 | 89 |
| 1986/2/8 | 8.2 | –7.7 | 0 | 2.0 | 144.4 | 48 |  | 1992/2/8 | 6.2 | 2.3 | 0.07 | 3.8 | 39.4 | 83 |
| 1986/2/9 | 7.5 | 0.6 | 0 | 2.5 | 77.0 | 49 |  | 1992/2/9 | 3.3 | 0.2 | 1.79 | 1.3 | 22.7 | 96 |
| 1986/2/10 | 7.5 | –3.5 | 0 | 3.8 | 160.1 | 55 |  | 1992/2/10 | 5.3 | 2.2 | 0 | 2.8 | 25.5 | 89 |
| 1986/2/11 | 10.2 | –6.1 | 0 | 2.0 | 176.4 | 63 |  | 1992/2/11 | 5.7 | 2.8 | 0.15 | 2.5 | 108.7 | 85 |
| 1986/2/12 | 4.5 | –1.5 | 0 | 2.0 | 32.9 | 69 |  | 1992/2/12 | 11.1 | 3.8 | 0.03 | 0.0 | 150.3 | 84 |
| 1986/2/13 | 13.7 | –1.2 | 0 | 1.5 | 164.6 | 59 |  | 1992/2/13 | 15.2 | 2.2 | 0 | 2.0 | 191.9 | 68 |
| 1986/2/14 | 7.9 | –0.4 | 0 | 5.8 | 151.7 | 55 |  | 1992/2/14 | 12.7 | 8.0 | 0.74 | 2.3 | 58.0 | 69 |
| 1986/2/15 | 6.6 | –3.3 | 0 | 2.3 | 170.3 | 48 |  | 1992/2/15 | 15.9 | 8.0 | 0.78 | 0.5 | 52.0 | 77 |
| 1986/2/16 | 4.2 | 0.3 | 0 | 2.3 | 51.5 | 54 |  | 1992/2/16 | 15.2 | 5.1 | 0 | 2.8 | 57.3 | 60 |
| 1986/2/17 | 6.9 | –0.3 | 0 | 1.5 | 171.3 | 60 |  | 1992/2/17 | 13.0 | 8.3 | 0 | 2.0 | 76.9 | 68 |
| 1986/2/18 | 10.8 | –5.0 | 0 | 1.3 | 165.6 | 71 |  | 1992/2/18 | 12.7 | 8.2 | 0.36 | 2.8 | 28.6 | 85 |
| 1986/2/19 | 9.2 | –0.9 | 0 | 4.0 | 151.0 | 77 |  | 1992/2/19 | 10.4 | 4.8 | 2.1 | 4.5 | 0.7 | 86 |
| 1986/2/20 | 7.4 | –1.3 | 0 | 3.5 | 197.1 | 60 |  | 1992/2/20 | 11.3 | 3.4 | 0.04 | 1.5 | 88.1 | 74 |
| 1986/2/21 | 11.5 | –3.9 | 0 | 2.3 | 202.9 | 51 |  | 1992/2/21 | 12.3 | 4.9 | 0 | 1.5 | 81.2 | 66 |
| 1986/2/22 | 12.5 | –4.2 | 0 | 1.8 | 172.0 | 47 |  | 1992/2/22 | 14.9 | 6.8 | 0 | 1.3 | 125.3 | 64 |
| 1986/2/23 | 13.7 | –3.1 | 0 | 2.5 | 201.7 | 50 |  | 1992/2/23 | 17.2 | 6.4 | 0 | 0.8 | 187.6 | 63 |
| 1986/2/24 | 10.0 | –2.6 | 0 | 2.5 | 182.1 | 61 |  | 1992/2/24 | 15.0 | 3.5 | 0 | 0.8 | 217.7 | 49 |
| 1986/2/25 | 12.5 | –1.0 | 0 | 3.0 | 124.5 | 61 |  | 1992/2/25 | 18.2 | 2.9 | 0 | 0.3 | 172.8 | 60 |
| 1986/2/26 | 6.0 | –4.3 | 0 | 4.3 | 101.2 | 28 |  | 1992/2/26 | 21.9 | 10.2 | 0 | 0.3 | 147.9 | 55 |
| 1986/2/27 | 2.8 | –7.4 | 0 | 1.3 | 205.2 | 40 |  | 1992/2/27 | 25.2 | 12.2 | 0 | 0.8 | 149.0 | 60 |
| 1986/2/28 | 4.4 | –6.7 | 0 | 1.0 | 153.1 | 50 |  | 1992/2/28 | 19.9 | 13.6 | 0 | 1.3 | 93.1 | 76 |
| 1986/3/1 | 8.1 | –6.7 | 0 | 2.5 | 215.6 | 36 |  | 1992/2/29 | 28.5 | 13.5 | 0 | 1.8 | 42.7 | 69 |
| 1986/3/2 | 12.6 | –5.0 | 0 | 3.5 | 231.0 | 35 |  | 1992/3/1 | 23.6 | 16.6 | 1.16 | 1.5 | 104.7 | 72 |
| 1986/3/3 | 17.4 | 1.1 | 0 | 3.5 | 238.3 | 29 |  | 1992/3/2 | 18.2 | 12.6 | 1.88 | 1.5 | 50.9 | 95 |
| 1986/3/4 | 19.5 | –1.2 | 0 | 1.8 | 242.1 | 31 |  | 1992/3/3 | 14.0 | 7.7 | 1.73 | 2.3 | 12.0 | 92 |
| 1986/3/5 | 20.7 | –0.4 | 0 | 2.0 | 232.3 | 32 |  | 1992/3/4 | 9.9 | 4.1 | 3.01 | 3.5 | 26.9 | 96 |
| 1986/3/6 | 21.4 | 0.4 | 0 | 1.5 | 214.7 | 41 |  | 1992/3/5 | 5.0 | 2.6 | 0.47 | 2.5 | 41.7 | 90 |
| 1986/3/7 | 22.8 | 6.1 | 0 | 3.5 | 193.1 | 28 |  | 1992/3/6 | 9.1 | 2.3 | 0 | 0.8 | 112.5 | 76 |
| 1986/3/8 | 15.3 | 5.6 | 0.65 | 3.8 | 20.5 | 67 |  | 1992/3/7 | 9.2 | 5.5 | 0 | 1.8 | 80.6 | 65 |
| 1986/3/9 | 9.5 | 1.5 | 0.16 | 2.8 | 144.6 | 63 |  | 1992/3/8 | 11.2 | 6.0 | 0 | 0.3 | 21.2 | 69 |
| 1986/3/10 | 8.7 | 0.0 | 0 | 3.5 | 95.8 | 71 |  | 1992/3/9 | 17.1 | 8.5 | 0 | 0.3 | 63.0 | 71 |
| 1986/3/11 | 16.5 | –0.2 | 0 | 2.0 | 191.9 | 76 |  | 1992/3/10 | 16.6 | 11.5 | 0.02 | 2.0 | 37.6 | 75 |
| 1986/3/12 | 16.6 | 3.8 | 0 | 2.5 | 185.8 | 78 |  | 1992/3/11 | 21.0 | 10.4 | 0 | 1.0 | 57.5 | 67 |
| 1986/3/13 | 14.3 | 5.0 | 0.08 | 5.0 | 39.5 | 76 |  | 1992/3/12 | 17.1 | 11.7 | 0.31 | 0.8 | 0.0 | 89 |
| 1986/3/14 | 15.3 | 2.0 | 0 | 2.3 | 212.8 | 83 |  | 1992/3/13 | 23.3 | 13.0 | 0.46 | 1.3 | 155.8 | 86 |
| 1986/3/15 | 10.7 | 2.7 | 0 | 7.3 | 123.7 | 48 |  | 1992/3/14 | 25.5 | 16.5 | 0.02 | 2.5 | 158.6 | 77 |
| 1986/3/16 | 10.9 | 1.0 | 0 | 4.5 | 174.4 | 32 |  | 1992/3/15 | 28.0 | 17.2 | 1.28 | 1.3 | 183.6 | 85 |
| 1986/3/17 | 7.8 | 0.0 | 1.57 | 2.8 | 7.8 | 87 |  | 1992/3/16 | 20.1 | 8.2 | 0.44 | 3.0 | 125.3 | 94 |
| 1986/3/18 | 12.6 | –0.7 | 0 | 3.8 | 241.0 | 80 |  | 1992/3/17 | 9.3 | 4.7 | 1.67 | 2.8 | 2.7 | 87 |
| 1986/3/19 | 12.8 | 0.6 | 0 | 3.0 | 136.3 | 65 |  | 1992/3/18 | 5.4 | 2.5 | 1.35 | 2.0 | 12.6 | 90 |
| 1986/3/20 | 11.0 | 6.6 | 0 | 2.0 | 101.0 | 64 |  | 1992/3/19 | 7.5 | 4.7 | 5.82 | 0.5 | 19.0 | 95 |
| 1986/3/21 | 12.2 | 3.7 | 0 | 1.0 | 177.5 | 65 |  | 1992/3/20 | 8.6 | 6.7 | 3.51 | 2.3 | 31.9 | 95 |
| 1986/3/22 | 14.7 | 4.0 | 0 | 1.0 | 146.5 | 67 |  | 1992/3/21 | 11.9 | 6.0 | 1.53 | 2.3 | 116.6 | 87 |
| 1986/3/23 | 16.2 | 4.1 | 0 | 3.3 | 170.9 | 62 |  | 1992/3/22 | 7.6 | 6.2 | 2.33 | 2.8 | 28.8 | 94 |
| 1986/3/24 | 16.0 | 4.2 | 0 | 2.5 | 176.0 | 74 |  | 1992/3/23 | 9.4 | 5.6 | 0.91 | 1.0 | 30.3 | 91 |
| 1986/3/25 | 18.9 | 5.2 | 0 | 2.0 | 166.0 | 65 |  | 1992/3/24 | 8.5 | 5.7 | 2.64 | 1.3 | 1.9 | 94 |
| 1986/3/26 | 18.0 | 7.9 | 0 | 3.0 | 149.4 | 66 |  | 1992/3/25 | 8.7 | 6.4 | 5.03 | 2.5 | 17.8 | 97 |
| 1986/3/27 | 16.8 | 6.2 | 0 | 2.8 | 179.5 | 82 |  | 1992/3/26 | 8.5 | 6.2 | 2.3 | 1.3 | 11.7 | 97 |
| 1986/3/28 | 17.3 | 7.8 | 0 | 2.8 | 115.0 | 81 |  | 1992/3/27 | 8.9 | 7.4 | 2.21 | 2.0 | 22.3 | 96 |
| 1986/3/29 | 15.0 | 7.4 | 0 | 4.0 | 126.5 | 68 |  | 1992/3/28 | 10.0 | 7.5 | 0.83 | 1.0 | 33.4 | 95 |
| 1986/3/30 | 16.9 | 7.6 | 0 | 2.3 | 264.7 | 51 |  | 1992/3/29 | 15.2 | 8.6 | 1.08 | 0.8 | 117.1 | 87 |
| 1986/3/31 | 20.0 | 4.3 | 0 | 4.3 | 205.6 | 51 |  | 1992/3/30 | 13.2 | 9.8 | 0.6 | 1.3 | 17.2 | 94 |
| 1986/4/1 | 22.2 | 5.5 | 0 | 3.0 | 212.6 | 47 |  | 1992/3/31 | 12.8 | 10.7 | 1.31 | 0.3 | 33.3 | 96 |
| 1986/4/2 | 16.7 | 10.6 | 0 | 1.8 | 68.5 | 64 |  | 1992/4/1 | 18.1 | 11.5 | 0 | 0.3 | 82.2 | 88 |
| 1986/4/3 | 21.1 | 8.2 | 0 | 2.0 | 229.2 | 68 |  | 1992/4/2 | 20.1 | 12.7 | 0.01 | 3.3 | 44.4 | 78 |
| 1986/4/4 | 20.7 | 10.2 | 0 | 2.5 | 213.2 | 50 |  | 1992/4/3 | 17.6 | 14.0 | 0.1 | 0.8 | 50.5 | 80 |
| 1986/4/5 | 24.4 | 10.6 | 0 | 3.3 | 231.0 | 43 |  | 1992/4/4 | 23.8 | 12.1 | 0 | 0.5 | 210.6 | 80 |
| 1986/4/6 | 23.0 | 10.4 | 0 | 3.3 | 258.2 | 32 |  | 1992/4/5 | 27.9 | 13.1 | 0 | 2.8 | 136.1 | 66 |
| 1986/4/7 | 22.2 | 8.5 | 0 | 2.3 | 171.3 | 54 |  | 1992/4/6 | 24.4 | 17.0 | 0.7 | 1.0 | 126.9 | 90 |
| 1986/4/8 | 23.3 | 8.3 | 0 | 3.5 | 277.8 | 67 |  | 1992/4/7 | 22.5 | 16.4 | 0 | 2.8 | 203.5 | 81 |
| 1986/4/9 | 23.9 | 10.2 | 0 | 3.8 | 254.5 | 68 |  | 1992/4/8 | 21.3 | 16.5 | 0.01 | 2.3 | 73.4 | 79 |
| 1986/4/10 | 18.9 | 12.6 | 0 | 5.3 | 97.8 | 52 |  | 1992/4/9 | 19.4 | 16.4 | 1.7 | 1.8 | 77.0 | 95 |
| 1986/4/11 | 19.5 | 4.7 | 0 | 0.8 | 229.4 | 57 |  | 1992/4/10 | 20.5 | 13.8 | 0.18 | 1.0 | 121.8 | 78 |
| 1986/4/12 | 21.2 | 9.5 | 0 | 3.8 | 185.2 | 55 |  | 1992/4/11 | 20.7 | 12.8 | 0.73 | 1.5 | 36.9 | 81 |
| 1986/4/13 | 23.6 | 9.2 | 0 | 3.0 | 215.2 | 63 |  | 1992/4/12 | 21.2 | 12.9 | 0 | 1.5 | 156.0 | 65 |
| 1986/4/14 | 24.4 | 13.9 | 0 | 3.5 | 271.1 | 52 |  | 1992/4/13 | 23.2 | 12.5 | 0 | 0.5 | 190.2 | 63 |
| 1986/4/15 | 20.1 | 11.0 | 0 | 3.5 | 264.6 | 59 |  | 1992/4/14 | 25.4 | 12.3 | 0 | 1.0 | 234.0 | 57 |
| 1986/4/16 | 23.3 | 9.3 | 0 | 4.8 | 197.5 | 67 |  | 1992/4/15 | 24.2 | 13.8 | 0 | 0.3 | 201.6 | 65 |
| 1986/4/17 | 24.2 | 14.3 | 0 | 4.0 | 188.9 | 62 |  | 1992/4/16 | 25.4 | 11.9 | 0 | 2.0 | 271.9 | 64 |
| 1986/4/18 | 26.3 | 12.0 | 0 | 5.0 | 271.5 | 69 |  | 1992/4/17 | 29.5 | 15.1 | 0 | 2.0 | 240.2 | 58 |
| 1986/4/19 | 27.2 | 14.5 | 0 | 3.3 | 185.2 | 55 |  | 1992/4/18 | 22.8 | 18.7 | 0.03 | 0.8 | 83.3 | 78 |
| 1986/4/20 | 18.5 | 6.9 | 0 | 3.3 | 253.5 | 34 |  | 1992/4/19 | 27.0 | 16.6 | 0.01 | 1.0 | 115.3 | 79 |
| 1986/4/21 | 20.1 | 9.9 | 0.07 | 3.3 | 244.8 | 59 |  | 1992/4/20 | 32.7 | 17.6 | 0 | 1.5 | 238.9 | 70 |
| 1986/4/22 | 23.3 | 4.9 | 0 | 1.8 | 299.3 | 46 |  | 1992/4/21 | 29.1 | 18.6 | 1.34 | 2.8 | 104.9 | 77 |
| 1986/4/23 | 29.9 | 11.0 | 0 | 3.8 | 262.0 | 47 |  | 1992/4/22 | 25.4 | 17.3 | 0.06 | 2.0 | 132.3 | 79 |
| 1986/4/24 | 23.6 | 13.2 | 0 | 4.3 | 200.7 | 54 |  | 1992/4/23 | 25.8 | 18.6 | 0.11 | 1.8 | 244.2 | 72 |
| 1986/4/25 | 18.5 | 11.8 | 0 | 4.5 | 72.5 | 63 |  | 1992/4/24 | 23.3 | 19.4 | 3.95 | 2.0 | 45.4 | 92 |
| 1986/4/26 | 13.2 | 10.1 | 0.3 | 1.3 | 20.7 | 84 |  | 1992/4/25 | 20.7 | 14.2 | 1.23 | 4.5 | 45.6 | 87 |
| 1986/4/27 | 17.6 | 9.6 | 0 | 2.0 | 88.2 | 74 |  | 1992/4/26 | 17.1 | 13.6 | 2.04 | 1.0 | 174.7 | 96 |
| 1986/4/28 | 20.0 | 8.6 | 0 | 0.3 | 117.0 | 68 |  | 1992/4/27 | 22.5 | 15.7 | 1.96 | 0.8 | 117.6 | 95 |
| 1986/4/29 | 16.4 | 13.0 | 0.48 | 1.5 | 25.5 | 79 |  | 1992/4/28 | 30.5 | 18.6 | 0.03 | 1.0 | 199.1 | 84 |
| 1986/4/30 | 14.9 | 11.2 | 0.21 | 2.0 | 65.2 | 80 |  | 1992/4/29 | 32.3 | 19.5 | 1.56 | 3.8 | 152.7 | 78 |
| 1986/5/1 | 20.1 | 8.5 | 0.02 | 1.5 | 277.8 | 75 |  | 1992/4/30 | 28.6 | 19.0 | 0.01 | 0.3 | 195.3 | 82 |
| 1986/5/2 | 23.2 | 9.3 | 0 | 2.0 | 295.5 | 70 |  | 1992/5/1 | 26.0 | 19.5 | 3.3 | 1.8 | 149.2 | 86 |
| 1986/5/3 | 24.2 | 9.4 | 0 | 1.5 | 252.3 | 68 |  | 1992/5/2 | 26.2 | 19.2 | 0.42 | 3.5 | 93.8 | 85 |
| 1986/5/4 | 25.0 | 11.6 | 0 | 2.5 | 301.7 | 65 |  | 1992/5/3 | 24.5 | 18.1 | 0 | 5.0 | 139.5 | 76 |
| 1986/5/5 | 25.8 | 12.7 | 0 | 1.8 | 262.0 | 69 |  | 1992/5/4 | 29.2 | 19.7 | 0.33 | 2.0 | 185.1 | 78 |
| 1986/5/6 | 32.9 | 13.2 | 0 | 2.0 | 316.8 | 57 |  | 1992/5/5 | 33.5 | 22.4 | 0.09 | 1.3 | 210.8 | 70 |
| 1986/5/7 | 32.0 | 15.3 | 0 | 5.0 | 251.6 | 49 |  | 1992/5/6 | 33.8 | 21.3 | 0.19 | 2.5 | 263.2 | 70 |
| 1986/5/8 | 36.1 | 18.8 | 0 | 5.3 | 275.7 | 53 |  | 1992/5/7 | 25.0 | 20.4 | 4.25 | 1.3 | 127.0 | 92 |
| 1986/5/9 | 25.1 | 15.8 | 0 | 3.5 | 284.4 | 55 |  | 1992/5/8 | 25.9 | 20.4 | 0 | 2.0 | 190.9 | 83 |
| 1986/5/10 | 23.9 | 13.6 | 0 | 3.3 | 193.4 | 60 |  | 1992/5/9 | 22.7 | 17.2 | 0.03 | 5.0 | 158.2 | 73 |
| 1986/5/11 | 28.3 | 12.9 | 0 | 3.3 | 300.0 | 66 |  | 1992/5/10 | 22.3 | 15.2 | 0 | 3.5 | 230.3 | 53 |
| 1986/5/12 | 24.6 | 18.1 | 0 | 2.0 | 111.0 | 77 |  | 1992/5/11 | 26.3 | 15.6 | 0 | 3.5 | 306.4 | 53 |
| 1986/5/13 | 31.2 | 19.5 | 0 | 2.3 | 274.9 | 58 |  | 1992/5/12 | 30.1 | 17.9 | 0 | 2.3 | 295.3 | 65 |
| 1986/5/14 | 30.9 | 13.5 | 0 | 2.0 | 314.6 | 37 |  | 1992/5/13 | 28.4 | 18.5 | 0 | 2.3 | 216.8 | 79 |
| 1986/5/15 | 32.2 | 14.4 | 0 | 2.0 | 289.8 | 56 |  | 1992/5/14 | 24.8 | 19.4 | 2.74 | 1.8 | 109.5 | 90 |
| 1986/5/16 | 35.2 | 20.9 | 0 | 3.3 | 316.8 | 45 |  | 1992/5/15 | 26.1 | 19.4 | 0.22 | 1.3 | 235.2 | 87 |
| 1986/5/17 | 34.4 | 18.4 | 0.05 | 2.5 | 279.4 | 57 |  | 1992/5/16 | 27.9 | 19.2 | 2.23 | 3.5 | 238.9 | 86 |
| 1986/5/18 | 25.6 | 14.6 | 4.01 | 5.0 | 17.9 | 96 |  | 1992/5/17 | 23.1 | 16.8 | 4.76 | 2.0 | 78.2 | 98 |
| 1986/5/19 | 22.5 | 13.7 | 0.07 | 3.0 | 190.7 | 83 |  | 1992/5/18 | 21.6 | 16.8 | 0.05 | 1.5 | 45.7 | 81 |
| 1986/5/20 | 23.4 | 16.0 | 0 | 1.8 | 109.8 | 84 |  | 1992/5/19 | 20.0 | 16.8 | 0 | 1.3 | 54.6 | 81 |
| 1986/5/21 | 28.0 | 12.5 | 0 | 1.3 | 304.9 | 73 |  | 1992/5/20 | 25.6 | 14.6 | 0 | 0.3 | 234.3 | 77 |
| 1986/5/22 | 28.1 | 13.4 | 0 | 3.8 | 301.5 | 61 |  | 1992/5/21 | 23.7 | 18.4 | 0.12 | 1.5 | 84.7 | 80 |
| 1986/5/23 | 29.4 | 13.9 | 0 | 3.3 | 310.3 | 60 |  | 1992/5/22 | 28.5 | 16.9 | 0 | 0.5 | 209.1 | 80 |
| 1986/5/24 | 27.2 | 16.9 | 0 | 4.5 | 191.6 | 67 |  | 1992/5/23 | 31.0 | 19.7 | 0 | 1.3 | 289.4 | 71 |
| 1986/5/25 | 20.3 | 12.8 | 0.71 | 5.3 | 10.9 | 79 |  | 1992/5/24 | 31.9 | 20.4 | 0 | 0.5 | 245.9 | 66 |
| 1986/5/26 | 22.7 | 12.0 | 0.63 | 1.3 | 269.3 | 86 |  | 1992/5/25 | 28.6 | 20.6 | 0 | 1.0 | 70.1 | 69 |
| 1986/5/27 | 28.0 | 13.9 | 0 | 2.3 | 308.7 | 76 |  | 1992/5/26 | 28.3 | 19.5 | 0.1 | 1.8 | 70.9 | 75 |
| 1986/5/28 | 29.9 | 17.9 | 0 | 3.8 | 319.7 | 68 |  | 1992/5/27 | 30.1 | 19.5 | 0 | 1.5 | 272.0 | 63 |
| 1986/5/29 | 31.1 | 15.4 | 1.18 | 0.8 | 328.7 | 77 |  | 1992/5/28 | 31.8 | 18.3 | 0 | 1.0 | 294.6 | 56 |
| 1986/5/30 | 32.7 | 18.6 | 0 | 2.0 | 235.9 | 69 |  | 1992/5/29 | 28.4 | 22.2 | 0.03 | 0.3 | 116.7 | 75 |
| 1986/5/31 | 34.3 | 19.3 | 0 | 0.8 | 266.7 | 64 |  | 1992/5/30 | 22.7 | 19.5 | 2.82 | 2.8 | 46.8 | 94 |
| 1986/6/1 | 31.9 | 20.8 | 0 | 2.0 | 211.6 | 72 |  | 1992/5/31 | 28.0 | 20.5 | 0 | 3.0 | 150.2 | 79 |
| 1986/6/2 | 37.7 | 21.7 | 0 | 1.0 | 312.7 | 61 |  | 1992/6/1 | 30.2 | 21.8 | 0 | 2.8 | 143.1 | 75 |
| 1986/6/3 | 35.7 | 20.6 | 0 | 1.5 | 226.5 | 54 |  | 1992/6/2 | 32.3 | 21.6 | 0 | 1.0 | 316.4 | 67 |
| 1986/6/4 | 35.6 | 22.7 | 0 | 2.0 | 167.0 | 57 |  | 1992/6/3 | 33.3 | 23.6 | 0 | 1.3 | 260.4 | 67 |
| 1986/6/5 | 29.8 | 19.4 | 0.41 | 3.3 | 239.5 | 62 |  | 1992/6/4 | 31.3 | 24.1 | 3.14 | 1.5 | 46.6 | 85 |
| 1986/6/6 | 32.0 | 17.4 | 0 | 0.8 | 301.9 | 60 |  | 1992/6/5 | 33.9 | 23.8 | 0 | 1.0 | 255.6 | 76 |
| 1986/6/7 | 32.5 | 18.9 | 0 | 1.0 | 286.1 | 51 |  | 1992/6/6 | 30.4 | 23.7 | 0.83 | 2.8 | 149.4 | 83 |
| 1986/6/8 | 32.0 | 19.6 | 0 | 2.8 | 267.1 | 46 |  | 1992/6/7 | 30.0 | 20.7 | 0.74 | 0.8 | 123.5 | 69 |
| 1986/6/9 | 30.7 | 17.4 | 0 | 2.3 | 121.9 | 56 |  | 1992/6/8 | 30.8 | 20.3 | 0 | 0.5 | 232.6 | 64 |
| 1986/6/10 | 31.3 | 20.1 | 0 | 1.5 | 304.5 | 60 |  | 1992/6/9 | 33.4 | 19.2 | 0 | 1.0 | 232.5 | 53 |
| 1986/6/11 | 28.0 | 21.4 | 0.02 | 2.8 | 101.6 | 74 |  | 1992/6/10 | 34.2 | 21.0 | 0 | 0.3 | 220.1 | 59 |
| 1986/6/12 | 22.5 | 16.7 | 0.32 | 5.3 | 156.5 | 85 |  | 1992/6/11 | 34.6 | 23.0 | 0 | 1.0 | 213.8 | 60 |
| 1986/6/13 | 24.6 | 18.0 | 0 | 4.5 | 185.9 | 77 |  | 1992/6/12 | 33.9 | 25.3 | 0 | 0.8 | 210.7 | 69 |
| 1986/6/14 | 23.0 | 16.5 | 0 | 2.3 | 175.0 | 84 |  | 1992/6/13 | 34.6 | 25.5 | 0 | 2.3 | 209.2 | 62 |
| 1986/6/15 | 23.1 | 18.2 | 0 | 1.5 | 76.4 | 88 |  | 1992/6/14 | 32.6 | 26.0 | 0.19 | 2.8 | 207.6 | 69 |
| 1986/6/16 | 30.9 | 17.3 | 0 | 1.8 | 300.5 | 77 |  | 1992/6/15 | 27.1 | 23.0 | 4.7 | 1.3 | 71.1 | 96 |
| 1986/6/17 | 35.2 | 18.0 | 0 | 0.8 | 306.6 | 63 |  | 1992/6/16 | 27.4 | 22.2 | 5.23 | 1.0 | 112.5 | 94 |
| 1986/6/18 | 36.7 | 20.0 | 0 | 2.3 | 282.4 | 54 |  | 1992/6/17 | 24.5 | 22.0 | 0.49 | 1.5 | 121.5 | 96 |
| 1986/6/19 | 33.3 | 19.6 | 0 | 2.0 | 203.5 | 59 |  | 1992/6/18 | 29.4 | 18.6 | 0 | 2.0 | 212.4 | 69 |
| 1986/6/20 | 32.8 | 22.2 | 0 | 1.3 | 208.2 | 63 |  | 1992/6/19 | 28.3 | 23.0 | 0 | 2.3 | 103.9 | 75 |
| **1986/6/21** | **32.5** | **21.4** | **0** | **1.1** | **242.9** | **69** |  | 1992/6/20 | 25.6 | 21.8 | 1.98 | 2.0 | 65.3 | 91 |
| **1986/6/22** | **33.5** | **20.0** | **0** | **1.6** | **299.0** | **66** |  | 1992/6/21 | 30.7 | 21.5 | 0.11 | 2.3 | 217.8 | 86 |
| **1986/6/23** | **33.0** | **21.6** | **0** | **2.4** | **289.0** | **61** |  | 1992/6/22 | 25.9 | 20.5 | 2.16 | 0.8 | 175.7 | 96 |
| **1986/6/24** | **32.0** | **18.9** | **0.07** | **1.3** | **302.0** | **66** |  | 1992/6/23 | 26.5 | 19.0 | 2.15 | 1.0 | 69.0 | 88 |
| **1986/6/25** | **34.4** | **21.8** | **0** | **1.9** | **278.5** | **65** |  | 1992/6/24 | 24.8 | 21.0 | 0.51 | 2.0 | 53.8 | 91 |
| **1986/6/26** | **35.5** | **24.9** | **0** | **3.0** | **152.3** | **62** |  | 1992/6/25 | 23.0 | 21.1 | 7.42 | 1.8 | 102.3 | 98 |
| **1986/6/27** | **34.0** | **25.2** | **0.11** | **2.1** | **295.8** | **67** |  | 1992/6/26 | 23.4 | 20.3 | 2.77 | 2.3 | 190.6 | 96 |
| **1986/6/28** | **37.6** | **23.3** | **0** | **0.8** | **330.0** | **55** |  | 1992/6/27 | 26.8 | 20.3 | 0 | 3.5 | 182.1 | 80 |
| **1986/6/29** | **36.2** | **25.8** | **0** | **1.6** | **241.3** | **46** |  | 1992/6/28 | 28.4 | 21.2 | 0 | 3.3 | 215.9 | 77 |
| **1986/6/30** | **34.8** | **26.2** | **0** | **0.5** | **131.6** | **56** |  | 1992/6/29 | 31.9 | 21.5 | 0 | 0.8 | 236.9 | 73 |
| 1986/7/1 | 32.1 | 26.0 | 0 | 1.8 | 57.8 | 58 |  | 1992/6/30 | 32.2 | 24.4 | 0.05 | 1.3 | 141.6 | 82 |
| 1986/7/2 | 27.5 | 21.7 | 0.35 | 1.0 | 25.6 | 86 |  | 1992/7/1 | 29.7 | 24.9 | 0.24 | 1.3 | 172.0 | 89 |
| 1986/7/3 | 23.4 | 20.1 | 0.48 | 2.0 | 34.8 | 92 |  | 1992/7/2 | 31.6 | 23.9 | 0.43 | 1.5 | 193.9 | 91 |
| 1986/7/4 | 25.1 | 17.7 | 0.21 | 2.0 | 114.4 | 81 |  | 1992/7/3 | 27.5 | 22.6 | 0.36 | 2.3 | 191.7 | 92 |
| 1986/7/5 | 29.4 | 17.3 | 0 | 2.0 | 264.6 | 78 |  | 1992/7/4 | 23.8 | 21.5 | 16.54 | 1.8 | 32.4 | 98 |
| 1986/7/6 | 32.3 | 19.9 | 0 | 2.5 | 319.3 | 66 |  | 1992/7/5 | 23.5 | 21.0 | 11.04 | 2.8 | 12.6 | 97 |
| 1986/7/7 | 32.7 | 20.9 | 0 | 2.3 | 307.9 | 71 |  | 1992/7/6 | 25.2 | 20.0 | 0.51 | 0.8 | 39.9 | 91 |
| 1986/7/8 | 34.5 | 22.0 | 0 | 1.5 | 292.9 | 66 |  | 1992/7/7 | 29.5 | 20.3 | 0 | 0.8 | 64.8 | 80 |
| 1986/7/9 | 33.4 | 23.5 | 0 | 2.5 | 148.4 | 66 |  | 1992/7/8 | 29.1 | 21.9 | 0 | 1.8 | 215.4 | 75 |
| 1986/7/10 | 32.2 | 23.4 | 0.12 | 2.3 | 257.2 | 64 |  | 1992/7/9 | 30.7 | 21.5 | 0 | 1.3 | 152.9 | 78 |
| 1986/7/11 | 34.0 | 18.9 | 0 | 1.5 | 300.3 | 66 |  | 1992/7/10 | 28.0 | 23.2 | 0.56 | 1.5 | 121.6 | 88 |
| 1986/7/12 | 35.6 | 21.5 | 0 | 1.8 | 298.7 | 61 |  | 1992/7/11 | 27.5 | 22.6 | 7.44 | 1.0 | 266.8 | 98 |
| 1986/7/13 | 36.2 | 21.0 | 0 | 1.8 | 235.8 | 66 |  | 1992/7/12 | 33.0 | 22.6 | 0 | 1.5 | 277.2 | 84 |
| 1986/7/14 | 38.1 | 26.4 | 0 | 3.8 | 280.8 | 64 |  | 1992/7/13 | 34.0 | 24.8 | 0.01 | 0.8 | 286.9 | 74 |
| 1986/7/15 | 32.3 | 28.2 | 0 | 3.3 | 79.9 | 76 |  | 1992/7/14 | 35.3 | 24.6 | 0 | 1.0 | 292.7 | 73 |
| 1986/7/16 | 31.6 | 24.6 | 0 | 1.8 | 219.8 | 76 |  | 1992/7/15 | 34.4 | 24.5 | 0 | 1.0 | 283.4 | 75 |
| 1986/7/17 | 31.9 | 23.0 | 0 | 3.8 | 214.2 | 77 |  | 1992/7/16 | 36.5 | 25.5 | 0 | 1.3 | 292.6 | 69 |
| 1986/7/18 | 33.2 | 21.8 | 0 | 1.3 | 277.5 | 70 |  | 1992/7/17 | 36.9 | 25.9 | 0 | 1.0 | 290.4 | 64 |
| 1986/7/19 | 29.1 | 23.6 | 0.02 | 3.3 | 93.3 | 85 |  | 1992/7/18 | 36.6 | 26.9 | 0 | 1.3 | 284.4 | 66 |
| 1986/7/20 | 29.4 | 22.6 | 0.1 | 1.8 | 190.3 | 77 |  | 1992/7/19 | 33.0 | 26.5 | 0.01 | 2.3 | 297.5 | 77 |
| 1986/7/21 | 32.7 | 22.0 | 0 | 3.3 | 275.9 | 75 |  | 1992/7/20 | 37.2 | 24.6 | 0 | 2.3 | 313.0 | 61 |
| 1986/7/22 | 35.4 | 22.2 | 0 | 3.3 | 251.7 | 72 |  | 1992/7/21 | 38.1 | 25.9 | 0 | 0.8 | 310.9 | 60 |
| 1986/7/23 | 36.6 | 24.6 | 0 | 3.8 | 302.2 | 71 |  | 1992/7/22 | 37.5 | 27.2 | 0 | 1.5 | 269.9 | 65 |
| 1986/7/24 | 32.4 | 25.2 | 0 | 4.8 | 153.7 | 78 |  | 1992/7/23 | 37.0 | 25.5 | 0 | 1.3 | 320.9 | 57 |
| 1986/7/25 | 31.7 | 22.8 | 0 | 2.8 | 192.8 | 77 |  | 1992/7/24 | 36.6 | 27.7 | 0 | 0.5 | 304.6 | 62 |
| 1986/7/26 | 31.6 | 22.2 | 0 | 1.3 | 207.8 | 77 |  | 1992/7/25 | 37.8 | 27.5 | 0.4 | 1.0 | 312.5 | 66 |
| 1986/7/27 | 33.9 | 22.8 | 0 | 2.8 | 294.7 | 74 |  | 1992/7/26 | 35.6 | 26.0 | 0 | 1.5 | 303.4 | 67 |
| 1986/7/28 | 35.3 | 25.5 | 0 | 2.8 | 234.5 | 74 |  | 1992/7/27 | 37.3 | 26.0 | 0 | 0.8 | 292.0 | 64 |
| 1986/7/29 | 36.3 | 26.2 | 0 | 3.5 | 224.5 | 71 |  | 1992/7/28 | 37.8 | 27.2 | 0 | 1.5 | 304.1 | 58 |
| 1986/7/30 | 32.0 | 23.1 | 1.37 | 1.3 | 146.6 | 88 |  | **1992/7/29** | **39.0** | **27.6** | **0** | **1.0** | **292.2** | **54** |
| 1986/7/31 | 28.0 | 23.3 | 0.14 | 2.0 | 187.8 | 86 |  | **1992/7/30** | **39.4** | **28.1** | **0** | **1.0** | **281.8** | **58** |
| 1986/8/1 | 30.8 | 20.4 | 0 | 2.0 | 302.8 | 73 |  | **1992/7/31** | **39.3** | **25.7** | **0.01** | **1.0** | **188.2** | **62** |
| 1986/8/2 | 31.6 | 20.6 | 0 | 2.5 | 302.1 | 70 |  | **1992/8/1** | **38.0** | **25.2** | **0** | **1.5** | **279.1** | **61** |
| 1986/8/3 | 30.5 | 21.9 | 0 | 0.8 | 271.2 | 76 |  | **1992/8/2** | **38.4** | **28.0** | **0** | **1.8** | **287.2** | **63** |
| 1986/8/4 | 32.1 | 21.4 | 0 | 0.5 | 239.1 | 75 |  | **1992/8/3** | **38.1** | **26.9** | **0** | **1.0** | **266.8** | **65** |
| 1986/8/5 | 27.6 | 21.7 | 0 | 3.3 | 126.2 | 80 |  | **1992/8/4** | **38.7** | **27.6** | **0** | **1.8** | **243.5** | **61** |
| 1986/8/6 | 28.0 | 18.5 | 0.06 | 2.5 | 261.7 | 75 |  | **1992/8/5** | **37.4** | **26.2** | **0.44** | **1.5** | **257.5** | **70** |
| 1986/8/7 | 32.1 | 18.8 | 0 | 0.0 | 286.3 | 69 |  | **1992/8/6** | **36.8** | **25.6** | **0.91** | **1.0** | **269.7** | **74** |
| 1986/8/8 | 32.4 | 20.2 | 0 | 2.5 | 289.6 | 72 |  | 1992/8/7 | 34.3 | 24.0 | 1.84 | 1.0 | 251.9 | 79 |
| 1986/8/9 | 33.1 | 22.2 | 0 | 2.5 | 247.1 | 78 |  | 1992/8/8 | 34.0 | 23.9 | 1.57 | 1.5 | 236.5 | 88 |
| 1986/8/10 | 31.6 | 23.5 | 0 | 2.8 | 214.6 | 80 |  | 1992/8/9 | 36.2 | 25.7 | 0 | 1.0 | 251.6 | 74 |
| 1986/8/11 | 34.9 | 23.4 | 0.23 | 2.8 | 269.7 | 78 |  | 1992/8/10 | 35.6 | 26.9 | 0 | 0.5 | 285.8 | 71 |
| 1986/8/12 | 37.0 | 27.6 | 0 | 5.5 | 253.8 | 64 |  | 1992/8/11 | 36.8 | 25.8 | 0 | 1.5 | 286.9 | 65 |
| 1986/8/13 | 35.5 | 24.5 | 0 | 2.0 | 267.8 | 64 |  | 1992/8/12 | 37.4 | 28.0 | 0 | 1.8 | 274.4 | 60 |
| 1986/8/14 | 33.5 | 24.3 | 2.91 | 2.5 | 140.5 | 86 |  | 1992/8/13 | 37.5 | 28.2 | 0 | 0.8 | 281.9 | 58 |
| 1986/8/15 | 24.8 | 19.4 | 2.36 | 3.8 | 84.0 | 89 |  | 1992/8/14 | 33.5 | 26.0 | 1.03 | 1.5 | 251.9 | 72 |
| 1986/8/16 | 28.1 | 20.9 | 0 | 2.3 | 189.9 | 80 |  | 1992/8/15 | 28.0 | 24.5 | 0.09 | 1.5 | 209.4 | 85 |
| 1986/8/17 | 30.1 | 20.5 | 0 | 0.5 | 168.3 | 81 |  | 1992/8/16 | 31.8 | 22.1 | 0 | 1.8 | 96.8 | 74 |
| 1986/8/18 | 30.2 | 21.4 | 1.32 | 2.5 | 96.3 | 84 |  | 1992/8/17 | 31.0 | 23.6 | 0 | 3.5 | 69.8 | 74 |
| 1986/8/19 | 24.8 | 20.9 | 0.36 | 1.5 | 85.9 | 92 |  | 1992/8/18 | 33.3 | 24.4 | 0 | 2.0 | 105.0 | 72 |
| 1986/8/20 | 28.8 | 17.9 | 0 | 1.5 | 253.8 | 83 |  | 1992/8/19 | 29.8 | 24.9 | 0.01 | 2.8 | 55.1 | 74 |
| 1986/8/21 | 28.5 | 19.2 | 0 | 1.5 | 212.2 | 77 |  | 1992/8/20 | 33.8 | 23.2 | 0 | 2.0 | 243.3 | 64 |
| 1986/8/22 | 30.7 | 17.1 | 0 | 1.8 | 287.0 | 77 |  | 1992/8/21 | 35.7 | 25.6 | 0 | 2.5 | 267.0 | 58 |
| 1986/8/23 | 30.3 | 16.7 | 0 | 2.5 | 257.8 | 72 |  | 1992/8/22 | 35.7 | 24.0 | 1.8 | 1.3 | 278.8 | 72 |
| 1986/8/24 | 30.8 | 21.1 | 0 | 1.8 | 277.1 | 68 |  | 1992/8/23 | 29.8 | 25.5 | 0.22 | 2.8 | 265.5 | 87 |
| 1986/8/25 | 30.3 | 21.4 | 0 | 1.0 | 248.1 | 76 |  | 1992/8/24 | 26.8 | 23.6 | 0.25 | 2.0 | 228.0 | 93 |
| 1986/8/26 | 29.5 | 18.4 | 0 | 0.8 | 218.4 | 81 |  | 1992/8/25 | 30.8 | 24.1 | 0.03 | 1.8 | 269.2 | 86 |
| 1986/8/27 | 30.5 | 21.9 | 0 | 1.8 | 255.7 | 65 |  | 1992/8/26 | 33.2 | 24.6 | 0 | 1.8 | 245.0 | 79 |
| 1986/8/28 | 31.3 | 19.2 | 0 | 2.0 | 262.0 | 61 |  | 1992/8/27 | 34.6 | 25.1 | 3.19 | 2.0 | 241.2 | 81 |
| 1986/8/29 | 32.0 | 16.7 | 0 | 1.5 | 246.2 | 72 |  | 1992/8/28 | 34.6 | 25.5 | 0.01 | 2.3 | 200.0 | 74 |
| 1986/8/30 | 31.5 | 19.3 | 0 | 2.3 | 203.0 | 71 |  | 1992/8/29 | 34.3 | 25.9 | 0 | 1.3 | 153.6 | 71 |
| 1986/8/31 | 33.4 | 19.2 | 0 | 2.0 | 195.1 | 70 |  | 1992/8/30 | 33.3 | 26.8 | 0.01 | 3.5 | 107.2 | 68 |
| 1986/9/1 | 31.0 | 21.6 | 0.01 | 1.5 | 269.9 | 81 |  | 1992/8/31 | 29.8 | 24.0 | 4.03 | 2.8 | 174.2 | 88 |
| 1986/9/2 | 31.3 | 18.7 | 0 | 2.3 | 285.9 | 71 |  | 1992/9/1 | 28.7 | 22.9 | 3.22 | 2.8 | 207.7 | 92 |
| 1986/9/3 | 30.5 | 16.3 | 0 | 1.8 | 246.3 | 59 |  | 1992/9/2 | 30.1 | 23.1 | 0 | 0.8 | 241.2 | 82 |
| 1986/9/4 | 28.2 | 16.7 | 0 | 1.3 | 200.3 | 78 |  | 1992/9/3 | 31.2 | 22.0 | 0 | 0.5 | 246.9 | 83 |
| 1986/9/5 | 31.0 | 15.8 | 0 | 1.8 | 253.0 | 68 |  | 1992/9/4 | 32.8 | 23.3 | 0 | 2.0 | 163.2 | 76 |
| 1986/9/6 | 28.3 | 18.6 | 0.05 | 1.5 | 101.6 | 83 |  | 1992/9/5 | 31.0 | 25.6 | 0.19 | 2.0 | 84.1 | 78 |
| 1986/9/7 | 23.7 | 20.7 | 0.37 | 1.5 | 21.9 | 91 |  | 1992/9/6 | 34.5 | 26.3 | 0 | 3.8 | 163.5 | 67 |
| 1986/9/8 | 25.9 | 19.2 | 0.96 | 1.3 | 33.7 | 93 |  | 1992/9/7 | 34.2 | 25.7 | 0 | 2.3 | 194.0 | 70 |
| 1986/9/9 | 23.6 | 17.0 | 1.63 | 1.5 | 43.6 | 92 |  | 1992/9/8 | 34.5 | 25.5 | 0 | 0.5 | 184.4 | 75 |
| 1986/9/10 | 21.5 | 15.4 | 0.11 | 1.8 | 67.6 | 93 |  | 1992/9/9 | 28.5 | 21.6 | 0.27 | 2.3 | 179.5 | 92 |
| 1986/9/11 | 25.4 | 14.8 | 0 | 1.8 | 174.1 | 88 |  | 1992/9/10 | 28.6 | 21.0 | 0 | 2.3 | 174.7 | 78 |
| 1986/9/12 | 25.5 | 17.5 | 0 | 2.3 | 123.4 | 86 |  | 1992/9/11 | 31.3 | 22.2 | 0 | 1.3 | 189.1 | 75 |
| 1986/9/13 | 26.0 | 16.6 | 0 | 1.8 | 195.7 | 70 |  | 1992/9/12 | 36.2 | 24.0 | 0 | 2.3 | 215.3 | 68 |
| 1986/9/14 | 28.7 | 16.9 | 0 | 1.5 | 203.7 | 75 |  | 1992/9/13 | 35.1 | 27.0 | 0 | 1.0 | 240.9 | 73 |
| 1986/9/15 | 28.3 | 19.0 | 0 | 2.3 | 155.8 | 79 |  | 1992/9/14 | 34.1 | 24.6 | 0 | 1.8 | 203.9 | 77 |
| 1986/9/16 | 27.2 | 18.6 | 0 | 2.5 | 241.4 | 64 |  | 1992/9/15 | 33.2 | 23.2 | 2.47 | 2.5 | 138.7 | 88 |
| 1986/9/17 | 25.1 | 11.0 | 0 | 2.5 | 174.1 | 61 |  | 1992/9/16 | 27.9 | 23.1 | 0 | 1.5 | 197.0 | 92 |
| 1986/9/18 | 28.0 | 12.8 | 0 | 0.5 | 208.2 | 69 |  | 1992/9/17 | 23.6 | 20.2 | 0.02 | 1.3 | 149.0 | 95 |
| 1986/9/19 | 29.8 | 13.8 | 0 | 1.5 | 239.4 | 68 |  | 1992/9/18 | 27.7 | 22.2 | 0 | 2.0 | 229.6 | 86 |
| 1986/9/20 | 24.7 | 14.1 | 0 | 2.3 | 219.7 | 66 |  | 1992/9/19 | 30.9 | 22.7 | 0 | 2.5 | 231.7 | 77 |
| 1986/9/21 | 27.8 | 10.8 | 0 | 1.3 | 241.7 | 66 |  | 1992/9/20 | 31.1 | 22.8 | 0 | 4.3 | 235.5 | 68 |
| 1986/9/22 | 32.1 | 11.5 | 0 | 2.3 | 250.6 | 59 |  | 1992/9/21 | 30.6 | 23.3 | 0 | 3.8 | 165.0 | 66 |
| 1986/9/23 | 29.9 | 13.9 | 0 | 2.5 | 233.3 | 51 |  | 1992/9/22 | 27.3 | 22.7 | 0 | 2.0 | 67.4 | 71 |
| 1986/9/24 | 30.4 | 15.2 | 0 | 0.8 | 217.7 | 63 |  | 1992/9/23 | 25.7 | 22.1 | 0.02 | 3.0 | 80.2 | 81 |
| 1986/9/25 | 29.7 | 16.1 | 0 | 1.0 | 115.5 | 71 |  | 1992/9/24 | 30.8 | 22.9 | 0 | 1.8 | 191.2 | 77 |
| 1986/9/26 | 29.2 | 15.4 | 0 | 1.0 | 187.5 | 77 |  | 1992/9/25 | 30.3 | 20.9 | 0 | 1.8 | 220.0 | 68 |
| 1986/9/27 | 20.9 | 14.4 | 0.81 | 4.0 | 60.8 | 80 |  | 1992/9/26 | 26.3 | 20.0 | 0 | 4.5 | 219.9 | 53 |
| 1986/9/28 | 15.8 | 12.1 | 1.06 | 1.5 | 25.2 | 84 |  | 1992/9/27 | 26.3 | 17.2 | 0 | 4.0 | 249.9 | 55 |
| 1986/9/29 | 19.0 | 10.9 | 0 | 0.8 | 122.6 | 81 |  | 1992/9/28 | 26.0 | 17.5 | 0 | 1.0 | 238.1 | 79 |
| 1986/9/30 | 25.6 | 7.6 | 0 | 0.5 | 224.8 | 77 |  | 1992/9/29 | 26.2 | 15.4 | 0 | 0.3 | 175.6 | 78 |
| 1986/10/1 | 26.5 | 8.5 | 0 | 1.0 | 220.8 | 70 |  | 1992/9/30 | 28.0 | 18.7 | 0 | 0.8 | 34.8 | 76 |
| 1986/10/2 | 26.2 | 7.6 | 0 | 0.3 | 215.4 | 70 |  | 1992/10/1 | 32.4 | 21.1 | 0 | 0.8 | 192.2 | 77 |
| 1986/10/3 | 25.9 | 11.0 | 0 | 0.8 | 164.2 | 67 |  | 1992/10/2 | 35.6 | 24.0 | 0 | 1.3 | 203.6 | 68 |
| 1986/10/4 | 26.0 | 11.5 | 0 | 1.3 | 196.2 | 66 |  | 1992/10/3 | 35.4 | 24.0 | 0 | 1.0 | 214.9 | 69 |
| 1986/10/5 | 26.4 | 11.1 | 0 | 1.5 | 183.2 | 67 |  | 1992/10/4 | 29.3 | 14.7 | 0.17 | 3.0 | 203.0 | 93 |
| 1986/10/6 | 25.9 | 10.5 | 0 | 2.3 | 187.5 | 68 |  | 1992/10/5 | 21.3 | 14.7 | 0.14 | 2.0 | 61.8 | 81 |
| 1986/10/7 | 23.7 | 10.6 | 0 | 2.0 | 115.4 | 74 |  | 1992/10/6 | 20.3 | 15.1 | 0 | 2.0 | 225.2 | 62 |
| 1986/10/8 | 25.9 | 11.0 | 0.01 | 1.5 | 215.0 | 68 |  | 1992/10/7 | 19.3 | 14.5 | 0 | 1.8 | 208.0 | 77 |
| 1986/10/9 | 21.5 | 8.0 | 0 | 3.3 | 219.4 | 50 |  | 1992/10/8 | 22.9 | 16.3 | 0 | 1.0 | 141.0 | 73 |
| 1986/10/10 | 20.2 | 5.2 | 0 | 1.0 | 212.3 | 59 |  | 1992/10/9 | 24.3 | 14.0 | 0 | 2.5 | 154.6 | 64 |
| 1986/10/11 | 22.5 | 4.4 | 0 | 1.0 | 206.2 | 66 |  | 1992/10/10 | 20.6 | 14.8 | 0.14 | 1.0 | 106.0 | 81 |
| 1986/10/12 | 22.8 | 5.5 | 0 | 1.3 | 183.1 | 63 |  | 1992/10/11 | 21.8 | 16.0 | 0.05 | 0.5 | 171.5 | 86 |
| 1986/10/13 | 26.1 | 8.3 | 0 | 2.5 | 187.3 | 60 |  | 1992/10/12 | 24.2 | 15.3 | 0 | 3.0 | 108.3 | 70 |
| 1986/10/14 | 23.5 | 11.4 | 0 | 2.3 | 190.4 | 54 |  | 1992/10/13 | 20.4 | 16.8 | 0 | 2.3 | 31.4 | 65 |
| 1986/10/15 | 25.0 | 7.2 | 0 | 1.8 | 182.9 | 58 |  | 1992/10/14 | 23.4 | 14.6 | 0 | 1.5 | 107.2 | 58 |
| 1986/10/16 | 18.7 | 11.6 | 0 | 5.0 | 40.9 | 69 |  | 1992/10/15 | 22.2 | 14.7 | 0 | 2.0 | 179.4 | 62 |
| 1986/10/17 | 14.2 | 7.9 | 3.74 | 5.8 | 0.0 | 93 |  | 1992/10/16 | 24.7 | 14.6 | 0 | 0.8 | 197.8 | 63 |
| 1986/10/18 | 12.0 | 7.6 | 0.13 | 2.3 | 35.0 | 80 |  | 1992/10/17 | 24.6 | 11.5 | 0 | 0.5 | 192.2 | 60 |
| 1986/10/19 | 11.5 | 8.5 | 0.37 | 2.0 | 19.0 | 87 |  | 1992/10/18 | 24.0 | 12.8 | 0 | 1.3 | 144.1 | 47 |
| 1986/10/20 | 10.9 | 7.6 | 2.52 | 1.3 | 19.7 | 97 |  | 1992/10/19 | 23.8 | 10.5 | 0 | 1.5 | 211.1 | 51 |
| 1986/10/21 | 14.2 | 7.9 | 0.15 | 0.8 | 136.3 | 93 |  | 1992/10/20 | 24.5 | 11.6 | 0 | 2.8 | 178.8 | 47 |
| 1986/10/22 | 13.7 | 6.6 | 0 | 1.3 | 112.6 | 84 |  | 1992/10/21 | 24.6 | 15.3 | 0 | 3.8 | 197.2 | 49 |
| 1986/10/23 | 15.3 | 7.5 | 0 | 3.0 | 113.8 | 86 |  | 1992/10/22 | 24.2 | 14.8 | 0 | 1.0 | 196.2 | 56 |
| 1986/10/24 | 20.9 | 6.2 | 0 | 3.3 | 180.3 | 86 |  | 1992/10/23 | 22.4 | 15.0 | 0.07 | 1.0 | 128.5 | 71 |
| 1986/10/25 | 20.4 | 9.2 | 0 | 2.5 | 162.3 | 85 |  | 1992/10/24 | 21.6 | 10.6 | 0 | 1.0 | 171.9 | 51 |
| 1986/10/26 | 19.8 | 10.0 | 0 | 1.3 | 160.4 | 70 |  | 1992/10/25 | 21.4 | 9.4 | 0 | 1.0 | 199.9 | 47 |
| 1986/10/27 | 21.4 | 7.4 | 0 | 3.3 | 123.3 | 70 |  | 1992/10/26 | 22.2 | 12.0 | 0 | 3.0 | 195.9 | 41 |
| 1986/10/28 | 10.2 | 5.0 | 0.01 | 3.5 | 126.9 | 49 |  | 1992/10/27 | 22.7 | 13.1 | 0 | 3.8 | 199.8 | 48 |
| 1986/10/29 | 13.1 | –0.2 | 0 | 2.8 | 195.6 | 49 |  | 1992/10/28 | 23.8 | 11.5 | 0 | 1.5 | 182.9 | 59 |
| 1986/10/30 | 16.2 | 0.5 | 0 | 3.0 | 173.7 | 58 |  | 1992/10/29 | 26.2 | 11.7 | 0 | 0.8 | 183.9 | 62 |
| 1986/10/31 | 21.3 | 4.3 | 0 | 2.5 | 167.0 | 66 |  | 1992/10/30 | 26.6 | 10.7 | 0 | 0.3 | 175.8 | 58 |
| 1986/11/1 | 16.0 | 6.1 | 0 | 2.5 | 155.8 | 63 |  | 1992/10/31 | 27.8 | 10.4 | 0 | 0.0 | 185.3 | 56 |
| 1986/11/2 | 21.2 | 5.5 | 0 | 2.0 | 129.5 | 68 |  | 1992/11/1 | 25.7 | 12.8 | 0 | 3.8 | 172.6 | 39 |
| 1986/11/3 | 15.2 | 4.4 | 0 | 1.5 | 177.9 | 53 |  | 1992/11/2 | 23.5 | 13.5 | 0 | 2.8 | 174.2 | 50 |
| 1986/11/4 | 19.8 | 1.9 | 0 | 2.8 | 162.4 | 68 |  | 1992/11/3 | 24.7 | 13.0 | 0 | 1.3 | 170.0 | 62 |
| 1986/11/5 | 19.3 | 2.2 | 0 | 1.8 | 132.6 | 78 |  | 1992/11/4 | 17.8 | 12.9 | 0.01 | 0.3 | 118.3 | 68 |
| 1986/11/6 | 15.3 | 8.2 | 0 | 1.3 | 101.2 | 76 |  | 1992/11/5 | 23.1 | 13.9 | 0 | 0.0 | 157.2 | 72 |
| 1986/11/7 | 12.5 | 5.7 | 0 | 2.8 | 75.7 | 63 |  | 1992/11/6 | 24.1 | 13.9 | 0 | 2.5 | 156.9 | 71 |
| 1986/11/8 | 14.2 | 4.2 | 0 | 3.8 | 169.4 | 48 |  | 1992/11/7 | 24.8 | 15.5 | 0 | 3.3 | 156.5 | 65 |
| 1986/11/9 | 18.7 | –1.5 | 0 | 1.3 | 179.5 | 60 |  | 1992/11/8 | 21.2 | 9.2 | 2.28 | 2.3 | 0.0 | 88 |
| 1986/11/10 | 17.2 | –0.9 | 0 | 1.0 | 136.5 | 55 |  | 1992/11/9 | 11.5 | 5.6 | 0.03 | 2.0 | 97.5 | 62 |
| 1986/11/11 | 12.0 | 7.5 | 0 | 1.0 | 38.0 | 63 |  | 1992/11/10 | 13.7 | 2.3 | 0 | 0.3 | 194.9 | 61 |
| 1986/11/12 | 16.0 | 2.8 | 0 | 1.8 | 114.7 | 78 |  | 1992/11/11 | 15.8 | 2.7 | 0 | 0.0 | 173.4 | 66 |
| 1986/11/13 | 18.3 | 3.7 | 0 | 2.5 | 146.4 | 87 |  | 1992/11/12 | 19.2 | 5.7 | 0 | 0.5 | 161.6 | 68 |
| 1986/11/14 | 11.9 | 4.5 | 0 | 7.0 | 25.2 | 41 |  | 1992/11/13 | 21.2 | 5.9 | 0 | 0.5 | 106.2 | 63 |
| 1986/11/15 | 8.6 | 0.9 | 0 | 2.3 | 117.8 | 37 |  | 1992/11/14 | 20.0 | 11.9 | 0 | 1.0 | 112.8 | 63 |
| 1986/11/16 | 8.5 | 0.2 | 0 | 1.5 | 57.2 | 55 |  | 1992/11/15 | 22.3 | 9.6 | 0 | 0.8 | 62.3 | 63 |
| 1986/11/17 | 13.1 | 4.3 | 0 | 0.3 | 80.8 | 68 |  | 1992/11/16 | 16.1 | 11.2 | 0.14 | 3.3 | 59.6 | 77 |
| 1986/11/18 | 13.1 | 0.7 | 0 | 0.8 | 75.5 | 72 |  | 1992/11/17 | 18.8 | 9.5 | 0 | 2.0 | 127.9 | 79 |
| 1986/11/19 | 10.3 | 3.9 | 0.11 | 0.5 | 44.3 | 85 |  | 1992/11/18 | 25.9 | 13.8 | 0 | 2.8 | 122.0 | 67 |
| 1986/11/20 | 12.5 | –2.2 | 0 | 1.5 | 110.9 | 89 |  | 1992/11/19 | 24.3 | 11.7 | 0.72 | 2.3 | 134.3 | 85 |
| 1986/11/21 | 9.8 | 4.2 | 0 | 1.8 | 19.9 | 90 |  | 1992/11/20 | 13.2 | 8.0 | 0.2 | 3.0 | 140.5 | 57 |
| 1986/11/22 | 8.4 | 5.4 | 0.11 | 4.3 | 2.5 | 95 |  | 1992/11/21 | 12.8 | 2.3 | 0 | 0.0 | 143.5 | 65 |
| 1986/11/23 | 6.3 | 3.3 | 0.03 | 3.5 | 16.0 | 95 |  | 1992/11/22 | 14.6 | 3.4 | 0 | 0.3 | 145.1 | 73 |
| 1986/11/24 | 5.2 | 3.4 | 0 | 3.5 | 22.7 | 80 |  | 1992/11/23 | 19.0 | 4.0 | 0 | 0.5 | 145.8 | 69 |
| 1986/11/25 | 4.5 | –1.7 | 0 | 2.3 | 59.6 | 54 |  | 1992/11/24 | 19.8 | 5.7 | 0 | 0.0 | 146.2 | 70 |
| 1986/11/26 | 4.3 | 0.0 | 0 | 0.3 | 31.1 | 51 |  | 1992/11/25 | 20.8 | 7.1 | 0 | 0.3 | 146.6 | 64 |
| 1986/11/27 | 6.3 | –3.0 | 0 | 3.3 | 98.0 | 54 |  | 1992/11/26 | 16.5 | 7.9 | 0 | 4.3 | 145.9 | 45 |
| 1986/11/28 | 4.2 | –0.1 | 0 | 3.3 | 49.0 | 59 |  | 1992/11/27 | 14.5 | 6.8 | 0 | 4.5 | 160.4 | 52 |
| 1986/11/29 | 3.4 | –6.5 | 0 | 2.0 | 93.9 | 54 |  | 1992/11/28 | 16.5 | 6.9 | 0 | 1.3 | 161.8 | 60 |
| 1986/11/30 | 11.1 | –6.2 | 0 | 3.0 | 141.9 | 52 |  | 1992/11/29 | 17.8 | 4.8 | 0 | 1.0 | 135.9 | 70 |
| 1986/12/1 | 9.5 | –3.5 | 0 | 1.5 | 90.5 | 70 |  | 1992/11/30 | 16.2 | 10.5 | 0 | 1.0 | 78.2 | 73 |
| 1986/12/2 | 10.8 | 4.0 | 0 | 3.3 | 113.0 | 64 |  | 1992/12/1 | 18.6 | 10.0 | 0 | 1.0 | 137.6 | 70 |
| 1986/12/3 | 11.5 | 1.5 | 0 | 6.8 | 133.8 | 35 |  | 1992/12/2 | 17.1 | 10.4 | 0 | 3.8 | 139.5 | 55 |
| 1986/12/4 | 14.1 | –4.0 | 0 | 2.8 | 133.9 | 52 |  | 1992/12/3 | 15.0 | 8.2 | 0 | 3.5 | 107.1 | 62 |
| 1986/12/5 | 13.0 | –1.4 | 0 | 2.5 | 112.7 | 57 |  | 1992/12/4 | 16.4 | 9.5 | 0 | 3.5 | 137.4 | 57 |
| 1986/12/6 | 9.4 | 0.4 | 0 | 2.0 | 136.2 | 46 |  | 1992/12/5 | 22.5 | 11.0 | 0 | 1.0 | 144.6 | 66 |
| 1986/12/7 | 8.2 | –5.2 | 0 | 1.0 | 134.6 | 50 |  | 1992/12/6 | 23.7 | 11.1 | 0.03 | 1.3 | 141.3 | 79 |
| 1986/12/8 | 3.6 | –2.5 | 0 | 2.5 | 19.3 | 46 |  | 1992/12/7 | 15.5 | 12.6 | 1.78 | 1.8 | 108.1 | 92 |
| 1986/12/9 | 12.8 | –1.6 | 0 | 3.3 | 101.0 | 49 |  | 1992/12/8 | 16.7 | 8.5 | 0 | 1.0 | 91.6 | 88 |
| 1986/12/10 | 14.4 | –3.7 | 0 | 3.3 | 116.4 | 55 |  | 1992/12/9 | 15.3 | 11.8 | 0.04 | 1.3 | 103.7 | 85 |
| 1986/12/11 | 14.7 | 0.8 | 0 | 3.5 | 114.6 | 56 |  | 1992/12/10 | 16.7 | 9.0 | 0 | 1.0 | 102.9 | 79 |
| 1986/12/12 | 9.2 | 3.6 | 0 | 3.3 | 10.5 | 67 |  | 1992/12/11 | 13.2 | 4.3 | 0 | 0.3 | 102.0 | 68 |
| 1986/12/13 | 6.0 | 3.5 | 0.75 | 4.0 | 13.7 | 87 |  | 1992/12/12 | 12.5 | 7.7 | 0.39 | 1.0 | 34.8 | 89 |
| 1986/12/14 | 6.1 | 2.2 | 0 | 5.5 | 43.3 | 69 |  | 1992/12/13 | 17.4 | 8.4 | 0.1 | 3.5 | 70.6 | 84 |
| 1986/12/15 | 2.7 | –1.1 | 0 | 3.0 | 17.4 | 54 |  | 1992/12/14 | 12.5 | 5.6 | 1.95 | 4.8 | 10.2 | 87 |
| 1986/12/16 | 1.2 | –2.4 | 0.26 | 3.3 | 28.1 | 84 |  | 1992/12/15 | 8.0 | 5.6 | 0 | 0.8 | 15.6 | 79 |
| 1986/12/17 | 0.0 | –1.7 | 0.74 | 0.8 | 31.1 | 99 |  | 1992/12/16 | 11.5 | 2.2 | 0 | 0.8 | 99.5 | 83 |
| 1986/12/18 | 3.2 | –9.4 | 0 | 1.3 | 131.0 | 74 |  | 1992/12/17 | 13.1 | 2.3 | 0 | 0.8 | 151.3 | 84 |
| 1986/12/19 | 1.8 | –6.0 | 0 | 2.0 | 127.3 | 59 |  | 1992/12/18 | 16.7 | 4.3 | 0 | 0.8 | 117.8 | 79 |
| 1986/12/20 | 0.7 | –5.3 | 0 | 3.5 | 70.1 | 79 |  | 1992/12/19 | 20.7 | 7.6 | 0 | 1.0 | 113.0 | 77 |
| 1986/12/21 | 2.7 | –5.0 | 0 | 2.0 | 104.3 | 78 |  | 1992/12/20 | 20.7 | 11.0 | 0 | 0.3 | 108.0 | 82 |
| 1986/12/22 | 2.7 | –6.2 | 0 | 2.0 | 76.2 | 83 |  | 1992/12/21 | 16.7 | 10.8 | 0.12 | 1.5 | 69.7 | 81 |
| 1986/12/23 | 7.8 | –2.2 | 0 | 3.0 | 109.0 | 85 |  | 1992/12/22 | 13.5 | 8.4 | 0.07 | 1.8 | 87.4 | 84 |
| 1986/12/24 | 8.5 | –3.5 | 0 | 2.0 | 108.2 | 79 |  | 1992/12/23 | 9.0 | 3.3 | 0.58 | 1.5 | 60.8 | 75 |
| 1986/12/25 | 8.9 | –2.3 | 0 | 3.0 | 109.4 | 63 |  | 1992/12/24 | 9.9 | –0.2 | 0 | 0.5 | 105.8 | 66 |
| 1986/12/26 | 0.0 | –3.7 | 0.1 | 3.0 | 26.4 | 72 |  | 1992/12/25 | 9.8 | 6.2 | 0.03 | 2.0 | 75.6 | 64 |
| 1986/12/27 | 3.9 | –2.8 | 0.04 | 2.0 | 75.0 | 90 |  | 1992/12/26 | 11.8 | 7.4 | 0.9 | 2.0 | 2.7 | 91 |
| 1986/12/28 | 0.0 | –8.0 | 0.01 | 2.3 | 36.9 | 86 |  | 1992/12/27 | 11.6 | 10.4 | 0.66 | 1.0 | 3.8 | 97 |
| 1986/12/29 | 0.6 | –3.3 | 0 | 1.0 | 54.7 | 96 |  | 1992/12/28 | 13.7 | 8.3 | 0 | 1.8 | 45.1 | 82 |
| 1986/12/30 | 0.5 | –2.6 | 0 | 2.0 | 23.3 | 95 |  | 1992/12/29 | 10.7 | 4.8 | 0 | 1.5 | 65.7 | 78 |
| 1986/12/31 | 1.0 | –3.1 | 0 | 5.0 | 78.9 | 77 |  | 1992/12/30 | 11.4 | 6.0 | 0.29 | 2.3 | 76.0 | 88 |
|  |  |  |  |  |  |  |  | 1992/12/31 | 10.0 | 7.1 | 0.12 | 1.3 | 86.3 | 93 |
| SZ | | | | | | | | |  |  |  |  |  |  |
| Date | *T*max | *T*min | *P* | *W ** | *W #* | *R*max | *M* | RH |  |  |  |  |  |  |
| 2010/1/1 | 19.1 | 14.2 | 0 | 2.4 |  | 308 | 1252 | 65 |  |  |  |  |  |  |
| 2010/1/2 | 20.0 | 15.5 | 0.28 | 2.2 |  | 55 | 928 | 84 |  |  |  |  |  |  |
| 2010/1/3 | 18.9 | 15.0 | 0.88 | 1.6 |  | 834 | 1135 | 82 |  |  |  |  |  |  |
| 2010/1/4 | 22.8 | 15.0 | 0 | 2.3 |  | 656 | 1243 | 69 |  |  |  |  |  |  |
| 2010/1/5 | 18.7 | 16.8 | 0 | 3.8 |  | 391 | 1117 | 71 |  |  |  |  |  |  |
| 2010/1/6 | 17.4 | 12.6 | 0.15 | 3.2 |  | 114 | 1120 | 81 |  |  |  |  |  |  |
| 2010/1/7 | 12.6 | 9.6 | 0.06 | 2.9 |  | 144 | 1137 | 78 |  |  |  |  |  |  |
| 2010/1/8 | 13.5 | 9.0 | 0.08 | 2.2 |  | 223 | 1243 | 78 |  |  |  |  |  |  |
| 2010/1/9 | 18.7 | 10.5 | 0 | 2.3 |  | 680 | 1402 | 73 |  |  |  |  |  |  |
| 2010/1/10 | 21.3 | 14.8 | 0 | 2.5 |  | 412 | 1322 | 72 |  |  |  |  |  |  |
| 2010/1/11 | 18.4 | 11.8 | 1.25 | 2.0 |  | 276 | 1209 | 86 |  |  |  |  |  |  |
| 2010/1/12 | 13.8 | 8.2 | 0 | 3.8 |  | 613 | 1202 | 61 |  |  |  |  |  |  |
| 2010/1/13 | 16.2 | 7.9 | 0 | 2.8 |  | 794 | 1325 | 37 |  |  |  |  |  |  |
| 2010/1/14 | 17.9 | 11.4 | 0 | 2.6 |  | 653 | 1204 | 46 |  |  |  |  |  |  |
| 2010/1/15 | 21.8 | 12.0 | 0 | 2.7 |  | 747 | 1214 | 55 |  |  |  |  |  |  |
| 2010/1/16 | 22.7 | 13.8 | 0 | 1.4 |  | 805 | 1158 | 57 |  |  |  |  |  |  |
| 2010/1/17 | 22.1 | 13.4 | 0 | 1.8 |  | 640 | 1134 | 65 |  |  |  |  |  |  |
| 2010/1/18 | 22.1 | 13.6 | 0 | 2.1 |  | 593 | 1216 | 72 |  |  |  |  |  |  |
| 2010/1/19 | 22.2 | 14.8 | 0 | 2.6 |  | 683 | 1154 | 75 |  |  |  |  |  |  |
| 2010/1/20 | 24.7 | 19.7 | 0 | 2.2 |  | 291 | 1224 | 76 |  |  |  |  |  |  |
| 2010/1/21 | 25.0 | 21.4 | 0 | 1.7 |  | 218 | 1451 | 78 |  |  |  |  |  |  |
| 2010/1/22 | 22.9 | 16.5 | 0 | 2.3 |  | 67 | 1540 | 79 |  |  |  |  |  |  |
| 2010/1/23 | 16.6 | 11.8 | 0.01 | 2.5 |  | 113 | 1344 | 79 |  |  |  |  |  |  |
| 2010/1/24 | 15.4 | 10.8 | 0 | 1.6 |  | 193 | 1111 | 77 |  |  |  |  |  |  |
| 2010/1/25 | 20.4 | 14.1 | 0 | 1.5 |  | 553 | 1240 | 74 |  |  |  |  |  |  |
| 2010/1/26 | 17.9 | 13.3 | 0 | 2.1 |  | 660 | 1439 | 72 |  |  |  |  |  |  |
| 2010/1/27 | 19.4 | 15.3 | 0 | 1.8 |  | 242 | 1108 | 77 |  |  |  |  |  |  |
| 2010/1/28 | 23.4 | 17.6 | 0 | 1.0 |  | 668 | 1339 | 82 |  |  |  |  |  |  |
| 2010/1/29 | 20.0 | 17.6 | 0.07 | 2.5 |  | 482 | 1447 | 81 |  |  |  |  |  |  |
| 2010/1/30 | 23.5 | 17.1 | 0 | 2.7 |  | 791 | 1153 | 73 |  |  |  |  |  |  |
| 2010/1/31 | 27.0 | 19.0 | 0 | 2.3 |  | 779 | 1303 | 74 |  |  |  |  |  |  |
| 2010/2/1 | 25.7 | 19.0 | 0 | 1.9 |  | 665 | 1125 | 79 |  |  |  |  |  |  |
| 2010/2/2 | 21.0 | 18.4 | 0 | 2.5 |  | 617 | 1025 | 81 |  |  |  |  |  |  |
| 2010/2/3 | 22.4 | 17.9 | 0 | 2.7 |  | 138 | 1055 | 81 |  |  |  |  |  |  |
| 2010/2/4 | 20.5 | 16.9 | 0 | 2.8 |  | 152 @ | 1200 @ | 82 |  |  |  |  |  |  |
| 2010/2/5 | 21.5 | 17.0 | 0 | 3.2 |  | 166 | 1218 | 79 |  |  |  |  |  |  |
| 2010/2/6 | 20.3 | 17.4 | 0 | 3.1 |  | 536 | 1155 | 82 |  |  |  |  |  |  |
| 2010/2/7 | 18.6 | 16.8 | 6.54 | 2.6 |  | 111 | 1250 | 90 |  |  |  |  |  |  |
| 2010/2/8 | 20.9 | 17.3 | 2.03 | 2.7 |  | 833 | 1040 | 90 |  |  |  |  |  |  |
| 2010/2/9 | 27.3 | 18.9 | 0 | 2.4 |  | 680 | 1057 | 84 |  |  |  |  |  |  |
| 2010/2/10 | 27.7 | 21.8 | 0 | 1.9 |  | 788 | 1246 | 80 |  |  |  |  |  |  |
| 2010/2/11 | 26.0 | 23.2 | 0 | 2.5 |  | 898 | 1216 | 80 |  |  |  |  |  |  |
| 2010/2/12 | 24.1 | 10.3 | 0 | 3.7 |  | 235 | 1010 | 68 |  |  |  |  |  |  |
| 2010/2/13 | 12.5 | 7.4 | 0 | 2.8 |  | 137 | 1123 | 83 |  |  |  |  |  |  |
| 2010/2/14 | 15.8 | 11.8 | 0.17 | 1.9 |  | 304 | 1125 | 92 |  |  |  |  |  |  |
| 2010/2/15 | 12.7 | 8.4 | 0.15 | 2.3 |  | 208 | 1129 | 90 |  |  |  |  |  |  |
| 2010/2/16 | 8.6 | 6.6 | 0.09 | 3.0 |  | 219 | 1211 | 82 |  |  |  |  |  |  |
| 2010/2/17 | 8.4 | 6.6 | 0.2 | 3.5 |  | 262 | 1239 | 84 |  |  |  |  |  |  |
| 2010/2/18 | 9.0 | 6.7 | 0.06 | 3.1 |  | 337 | 1101 | 68 |  |  |  |  |  |  |
| 2010/2/19 | 9.3 | 5.9 | 0.55 | 2.0 |  | 818 | 1119 | 84 |  |  |  |  |  |  |
| 2010/2/20 | 17.6 | 8.2 | 0 | 1.8 |  | 765 | 1125 | 68 |  |  |  |  |  |  |
| 2010/2/21 | 19.5 | 12.9 | 0 | 1.8 |  | 256 | 1121 | 75 |  |  |  |  |  |  |
| 2010/2/22 | 20.4 | 16.2 | 0 | 2.1 |  | 366 | 1107 | 81 |  |  |  |  |  |  |
| 2010/2/23 | 25.9 | 17.0 | 0 | 1.8 |  | 856 | 1233 | 76 |  |  |  |  |  |  |
| 2010/2/24 | 25.1 | 19.5 | 0 | 1.5 |  | 238 | 1046 | 81 |  |  |  |  |  |  |
| 2010/2/25 | 25.9 | 22.2 | 0 | 1.7 |  | 828 | 1221 | 84 |  |  |  |  |  |  |
| 2010/2/26 | 26.6 | 22.9 | 0 | 1.8 |  | 786 | 1053 | 85 |  |  |  |  |  |  |
| 2010/2/27 | 27.9 | 23.5 | 0 | 1.7 |  | 721 | 1153 | 83 |  |  |  |  |  |  |
| 2010/2/28 | 28.8 | 23.2 | 0 | 1.4 |  | 910 | 1119 | 80 |  |  |  |  |  |  |
| 2010/3/1 | 27.4 | 21.5 | 0 | 2.3 |  | 762 | 1138 | 80 |  |  |  |  |  |  |
| 2010/3/2 | 27.3 | 22.9 | 0 | 2.1 |  | 435 | 1422 | 81 |  |  |  |  |  |  |
| 2010/3/3 | 28.8 | 23.5 | 0 | 1.7 |  | 873 | 1230 | 75 |  |  |  |  |  |  |
| 2010/3/4 | 26.7 | 23.2 | 0 | 1.6 |  | 346 | 1451 | 81 |  |  |  |  |  |  |
| 2010/3/5 | 29.4 | 24.0 | 0 | 1.7 |  | 817 | 1245 | 74 |  |  |  |  |  |  |
| 2010/3/6 | 28.2 | 23.5 | 0 | 1.8 |  | 489 | 1008 | 81 |  |  |  |  |  |  |
| 2010/3/7 | 24.9 | 13.1 | 2.15 | 3.3 |  | 183 | 1233 | 88 |  |  |  |  |  |  |
| 2010/3/8 | 15.4 | 12.4 | 0.09 | 2.0 |  | 83 | 1045 | 90 |  |  |  |  |  |  |
| 2010/3/9 | 12.4 | 7.6 | 0.27 | 5.0 |  | 915 | 1229 | 69 |  |  |  |  |  |  |
| 2010/3/10 | 15.4 | 6.3 | 0 | 4.1 |  | 843 | 1223 | 37 |  |  |  |  |  |  |
| 2010/3/11 | 20.7 | 9.8 | 0 | 1.5 |  | 820 | 1043 | 46 |  |  |  |  |  |  |
| 2010/3/12 | 16.7 | 14.3 | 0.08 | 1.6 |  | 153 | 1036 | 81 |  |  |  |  |  |  |
| 2010/3/13 | 24.1 | 15.6 | 0 | 1.8 |  | 151 | 920 | 85 |  |  |  |  |  |  |
| 2010/3/14 | 27.2 | 19.6 | 0 | 2.9 |  | 849 | 1222 | 84 |  |  |  |  |  |  |
| 2010/3/15 | 28.2 | 21.3 | 0 | 1.9 |  | 828 | 1122 | 80 |  |  |  |  |  |  |
| 2010/3/16 | 24.2 | 17.6 | 0 | 2.3 |  | 281 | 1228 | 76 |  |  |  |  |  |  |
| 2010/3/17 | 22.6 | 17.0 | 0 | 2.1 |  | 477 | 1354 | 70 |  |  |  |  |  |  |
| 2010/3/18 | 26.1 | 18.0 | 0 | 1.7 |  | 792 | 1206 | 71 |  |  |  |  |  |  |
| 2010/3/19 | 26.8 | 18.3 | 0 | 1.6 |  | 702 | 1240 | 72 |  |  |  |  |  |  |
| 2010/3/20 | 26.0 | 18.7 | 0 | 1.5 |  | 627 | 1145 | 73 |  |  |  |  |  |  |
| 2010/3/21 | 28.5 | 19.6 | 0 | 1.9 |  | 794 | 1237 | 76 |  |  |  |  |  |  |
| 2010/3/22 | 27.5 | 18.7 | 0 | 2.3 |  | 912 | 1307 | 70 |  |  |  |  |  |  |
| 2010/3/23 | 28.4 | 20.6 | 0 | 1.8 |  | 812 | 1140 | 75 |  |  |  |  |  |  |
| 2010/3/24 | 29.3 | 22.0 | 0 | 1.8 |  | 915 | 1120 | 79 |  |  |  |  |  |  |
| 2010/3/25 | 24.5 | 13.3 | 0.8 | 5.9 |  | 724 | 1200 | 65 |  |  |  |  |  |  |
| 2010/3/26 | 21.2 | 14.7 | 0 | 3.2 |  | 873 | 1042 | 39 |  |  |  |  |  |  |
| 2010/3/27 | 20.0 | 16.0 | 0 | 1.9 |  | 539 | 1157 | 59 |  |  |  |  |  |  |
| 2010/3/28 | 25.1 | 15.9 | 0 | 2.2 |  | 831 | 1145 | 51 |  |  |  |  |  |  |
| 2010/3/29 | 20.5 | 16.6 | 0 | 2.0 |  | 734 | 1300 | 46 |  |  |  |  |  |  |
| 2010/3/30 | 21.8 | 17.9 | 0 | 3.6 |  | 278 | 1300 | 70 |  |  |  |  |  |  |
| 2010/3/31 | 26.2 | 19.9 | 0 | 2.3 |  | 929 | 1231 | 74 |  |  |  |  |  |  |
| 2010/4/1 | 28.4 | 21.2 | 0 | 2.5 |  | 799 | 1214 | 76 |  |  |  |  |  |  |
| 2010/4/2 | 23.6 | 18.5 | 0.57 | 1.4 |  | 86 | 1452 | 86 |  |  |  |  |  |  |
| 2010/4/3 | 18.8 | 15.9 | 0.01 | 2.4 |  | 198 | 749 | 83 |  |  |  |  |  |  |
| 2010/4/4 | 23.1 | 17.5 | 0 | 2.8 |  | 318 | 935 | 82 |  |  |  |  |  |  |
| 2010/4/5 | 24.6 | 19.9 | 0 | 2.3 |  | 193 | 953 | 86 |  |  |  |  |  |  |
| 2010/4/6 | 26.5 | 21.7 | 0 | 1.6 |  | 347 | 1111 | 83 |  |  |  |  |  |  |
| 2010/4/7 | 24.4 | 17.8 | 0.07 | 3.0 |  | 167 | 1015 | 83 |  |  |  |  |  |  |
| 2010/4/8 | 18.6 | 15.0 | 0.73 | 2.4 |  | 577 | 1214 | 83 |  |  |  |  |  |  |
| 2010/4/9 | 22.3 | 16.7 | 0 | 1.4 |  | 589 | 1226 | 78 |  |  |  |  |  |  |
| 2010/4/10 | 20.7 | 19.1 | 0.03 | 3.2 |  | 150 | 1158 | 87 |  |  |  |  |  |  |
| 2010/4/11 | 28.2 | 20.4 | 0.01 | 1.9 |  | 345 | 1141 | 84 |  |  |  |  |  |  |
| 2010/4/12 | 29.6 | 23.6 | 0 | 1.6 |  | 819 | 1107 | 81 |  |  |  |  |  |  |
| 2010/4/13 | 30.9 | 21.6 | 0 | 2.7 |  | 356 | 1210 | 80 |  |  |  |  |  |  |
| 2010/4/14 | 21.7 | 18.3 | 0 | 3.4 |  | 398 | 1143 | 78 |  |  |  |  |  |  |
| 2010/4/15 | 20.0 | 11.6 | 2.35 | 3.1 |  | 66 | 838 | 84 |  |  |  |  |  |  |
| 2010/4/16 | 17.8 | 11.4 | 0.03 | 2.4 |  | 363 | 1036 | 70 |  |  |  |  |  |  |
| 2010/4/17 | 22.8 | 16.9 | 0 | 1.8 |  | 475 | 1308 | 74 |  |  |  |  |  |  |
| 2010/4/18 | 22.5 | 17.5 | 0.48 | 2.9 |  | 348 | 1228 | 84 |  |  |  |  |  |  |
| 2010/4/19 | 28.7 | 20.0 | 0 | 1.6 |  | 895 | 1323 | 80 |  |  |  |  |  |  |
| 2010/4/20 | 28.3 | 21.9 | 0 | 1.7 |  | 1033 | 1155 | 82 |  |  |  |  |  |  |
| 2010/4/21 | 29.1 | 23.8 | 0 | 1.4 |  | 1031 | 1147 | 80 |  |  |  |  |  |  |
| 2010/4/22 | 27.5 | 21.0 | 2.18 | 1.9 |  | 237 | 1442 | 88 |  |  |  |  |  |  |
| 2010/4/23 | 24.8 | 17.2 | 0.01 | 4.1 |  | 1153 | 1153 | 61 |  |  |  |  |  |  |
| 2010/4/24 | 25.5 | 19.2 | 0 | 1.8 |  | 1088 | 1207 | 55 |  |  |  |  |  |  |
| 2010/4/25 | 23.4 | 18.7 | 0 | 2.9 |  | 352 | 1240 | 56 |  |  |  |  |  |  |
| 2010/4/26 | 25.4 | 19.3 | 0.03 | 2.0 |  | 141 | 1203 | 76 |  |  |  |  |  |  |
| 2010/4/27 | 26.2 | 17.8 | 0.06 | 2.2 |  | 1006 | 1319 | 68 |  |  |  |  |  |  |
| 2010/4/28 | 25.4 | 21.0 | 0.35 | 1.0 |  | 715 | 1250 | 77 |  |  |  |  |  |  |
| 2010/4/29 | 25.5 | 18.2 | 4.07 | 2.5 |  | 146 | 853 | 87 |  |  |  |  |  |  |
| 2010/4/30 | 27.4 | 18.1 | 0.23 | 2.4 |  | 1004 | 1106 | 72 |  |  |  |  |  |  |
| 2010/5/1 | 28.8 | 20.0 | 0 | 1.5 |  | 1006 | 1128 | 71 |  |  |  |  |  |  |
| 2010/5/2 | 29.0 | 22.0 | 0 | 2.1 |  | 881 | 1108 | 73 |  |  |  |  |  |  |
| 2010/5/3 | 28.3 | 21.8 | 0 | 1.8 |  | 991 | 1113 | 73 |  |  |  |  |  |  |
| 2010/5/4 | 27.9 | 21.9 | 0 | 2.4 |  | 1121 | 1155 | 75 |  |  |  |  |  |  |
| 2010/5/5 | 29.3 | 23.6 | 0 | 1.3 |  | 432 | 1127 | 79 |  |  |  |  |  |  |
| 2010/5/6 | 29.9 | 25.6 | 0 | 1.5 |  | 865 | 1019 | 84 |  |  |  |  |  |  |
| 2010/5/7 | 28.9 | 21.7 | 10.08 | 1.4 |  | 515 | 939 | 84 |  |  |  |  |  |  |
| 2010/5/8 | 31.1 | 25.1 | 0 | 1.6 |  | 960 | 1243 | 81 |  |  |  |  |  |  |
| 2010/5/9 | 30.9 | 24.7 | 0.01 | 3.4 |  | 983 | 1227 | 78 |  |  |  |  |  |  |
| 2010/5/10 | 27.8 | 21.1 | 3.49 | 1.6 |  | 85 | 1444 | 89 |  |  |  |  |  |  |
| 2010/5/11 | 28.2 | 22.1 | 0.01 | 2.2 |  | 613 | 803 | 78 |  |  |  |  |  |  |
| 2010/5/12 | 28.5 | 22.9 | 0 | 2.7 |  | 920 | 1331 | 75 |  |  |  |  |  |  |
| 2010/5/13 | 27.3 | 22.7 | 0 | 2.9 |  | 919 | 1331 | 78 |  |  |  |  |  |  |
| 2010/5/14 | 29.8 | 23.6 | 0 | 2.1 |  | 993 | 1231 | 80 |  |  |  |  |  |  |
| 2010/5/15 | 28.3 | 22.7 | 1.34 | 3.2 |  | 588 | 1133 | 83 |  |  |  |  |  |  |
| **2010/5/16** | **30.0** | **23.2** | **0** | **2.1** | **2.1** | **1020** | **1146** | **82.4** |  |  |  |  |  |  |
| **2010/5/17** | **31.2** | **24.0** | **0** | **1.8** | **1.8** | **1158** | **1154** | **77.3** |  |  |  |  |  |  |
| **2010/5/18** | **30.6** | **24.8** | **0** | **1.0** | **1** | **1075** | **1159** | **79.3** |  |  |  |  |  |  |
| **2010/5/19** | **30.6** | **23.1** | **0** | **0.9** | **0.9** | **286** | **1446** | **85.4** |  |  |  |  |  |  |
| **2010/5/20** | **30.4** | **22.0** | **0** | **1.0** | **1** | **886** | **1055** | **80.3** |  |  |  |  |  |  |
| **2010/5/21** | **31.6** | **26.0** | **0** | **1.3** | **1.3** | **1087** | **1145** | **80.3** |  |  |  |  |  |  |
| **2010/5/22** | **29.0** | **26.7** | **0** | **2.6** | **2.6** | **859** | **832** | **83.4** |  |  |  |  |  |  |
| **2010/5/23** | **28.3** | **23.8** | **0** | **1.7** | **1.7** | **1049** | **1404** | **79.3** |  |  |  |  |  |  |
| **2010/5/24** | **31.9** | **22.4** | **0** | **1.2** | **1.2** | **1005** | **1147** | **51.9** |  |  |  |  |  |  |
| **2010/5/25** | **31.5** | **22.1** | **0** | **1.2** | **1.2** | **956** | **1131** | **61** |  |  |  |  |  |  |
| **2010/5/26** | **30.9** | **23.4** | **0** | **1.3** | **1.3** | **951** | **1203** | **67.1** |  |  |  |  |  |  |
| **2010/5/27** | **28.3** | **25.2** | **0** | **1.3** | **1.3** | **991** | **1118** | **78.3** |  |  |  |  |  |  |
| **2010/5/28** | **31.7** | **25.2** | **0** | **1.1** | **1.1** | **1084** | **1110** | **76.3** |  |  |  |  |  |  |
| **2010/5/29** | **30.1** | **24.6** | **0** | **1.6** | **1.6** | **958** | **1237** | **84.4** |  |  |  |  |  |  |
| **2010/5/30** | **29.4** | **24.9** | **0** | **0.3** | **0.3** | **802** | **1353** | **88.5** |  |  |  |  |  |  |
| **2010/5/31** | **27.1** | **24.4** | **0** | **1.7** | **1.7** | **784** | **1101** | **80.3** |  |  |  |  |  |  |
| **2010/6/1** | **27.4** | **21.9** | **0** | **2.3** | **2.3** | **617** | **903** | **65.1** |  |  |  |  |  |  |
| **2010/6/2** | **23.7** | **19.8** | **0** | **2.1** | **2.1** | **856 @** | **1200 @** | **88.5** |  |  |  |  |  |  |
| **2010/6/3** | **26.5** | **19.5** | **0** | **0.7** | **0.7** | **1094** | **1039** | **82.4** |  |  |  |  |  |  |
| **2010/6/4** | **28.4** | **22.5** | **0** | **0.8** | **0.8** | **1067** | **1229** | **82.4** |  |  |  |  |  |  |
| 2010/6/5 | 28.8 | 23.6 | 0.07 | 1.4 |  | 917 | 1229 | 76 |  |  |  |  |  |  |
| 2010/6/6 | 29.5 | 23.0 | 0 | 1.4 |  | 872 | 1133 | 71 |  |  |  |  |  |  |
| 2010/6/7 | 29.5 | 23.1 | 0 | 2.0 |  | 974 | 1221 | 67 |  |  |  |  |  |  |
| 2010/6/8 | 29.4 | 23.4 | 0 | 2.3 |  | 1019 | 948 | 69 |  |  |  |  |  |  |
| 2010/6/9 | 28.8 | 23.9 | 0.63 | 1.7 |  | 954 | 1413 | 87 |  |  |  |  |  |  |
| 2010/6/10 | 27.5 | 24.6 | 3.89 | 1.2 |  | 506 | 1536 | 90 |  |  |  |  |  |  |
| 2010/6/11 | 30.7 | 25.3 | 0 | 1.5 |  | 615 | 1407 | 82 |  |  |  |  |  |  |
| 2010/6/12 | 30.4 | 24.7 | 0.92 | 1.5 |  | 873 | 1347 | 80 |  |  |  |  |  |  |
| 2010/6/13 | 30.1 | 26.4 | 0.17 | 4.4 |  | 900 | 1252 | 88 |  |  |  |  |  |  |
| 2010/6/14 | 30.4 | 27.3 | 0.07 | 6.1 |  | 1147 | 1132 | 83 |  |  |  |  |  |  |
| 2010/6/15 | 30.0 | 27.7 | 0.02 | 5.5 |  | 622 | 1213 | 87 |  |  |  |  |  |  |
| 2010/6/16 | 30.2 | 27.9 | 0 | 3.7 |  | 526 | 1059 | 84 |  |  |  |  |  |  |
| 2010/6/17 | 31.0 | 28.3 | 0 | 5.5 |  | 908 | 1236 | 79 |  |  |  |  |  |  |
| 2010/6/18 | 31.0 | 28.0 | 0 | 6.2 |  | 982 | 1138 | 76 |  |  |  |  |  |  |
| 2010/6/19 | 31.8 | 27.6 | 0 | 3.5 |  | 1229 | 1042 | 75 |  |  |  |  |  |  |
| 2010/6/20 | 30.9 | 28.0 | 0 | 3.4 |  | 703 | 917 | 78 |  |  |  |  |  |  |
| 2010/6/21 | 32.1 | 27.5 | 0 | 2.6 |  | 1015 | 1319 | 77 |  |  |  |  |  |  |
| **2010/6/22** | **32.3** | **27.4** | **0** | **1.2** | **0.8** | **1194** | **1312** | **74.3** |  |  |  |  |  |  |
| **2010/6/23** | **30.4** | **24.5** | **0** | **0.6** | **0.4** | **1029** | **1122** | **83.1** |  |  |  |  |  |  |
| **2010/6/24** | **30.7** | **27.1** | **0** | **1.9** | **1.3** | **928** | **1017** | **83.1** |  |  |  |  |  |  |
| **2010/6/25** | **29.3** | **26.6** | **0** | **1.7** | **1.2** | **350** | **1331** | **81.2** |  |  |  |  |  |  |
| **2010/6/26** | **27.7** | **25.2** | **0** | **1.0** | **0.7** | **144** | **1232** | **90** |  |  |  |  |  |  |
| **2010/6/27** | **27.3** | **24.8** | **0** | **0.7** | **0.5** | **194** | **1503** | **87** |  |  |  |  |  |  |
| **2010/6/28** | **27.7** | **24.2** | **0** | **0.7** | **0.5** | **126** | **738** | **89** |  |  |  |  |  |  |
| **2010/6/29** | **32.4** | **24.6** | **0** | **1.0** | **0.7** | **1150** | **1320** | **76.3** |  |  |  |  |  |  |
| **2010/6/30** | **33.1** | **26.4** | **0** | **0.5** | **0.3** | **1012** | **1313** | **74.3** |  |  |  |  |  |  |
| **2010/7/1** | **32.9** | **26.4** | **0** | **1.0** | **0.7** | **1025** | **1143** | **69.4** |  |  |  |  |  |  |
| **2010/7/2** | **33.0** | **27.6** | **0** | **1.3** | **0.9** | **1048** | **1139** | **74.3** |  |  |  |  |  |  |
| **2010/7/3** | **32.5** | **27.9** | **0** | **1.6** | **1.1** | **1053** | **1203** | **73.3** |  |  |  |  |  |  |
| **2010/7/4** | **32.1** | **28.3** | **0** | **2.1** | **1.4** | **1108** | **1120** | **76.3** |  |  |  |  |  |  |
| **2010/7/5** | **33.3** | **28.1** | **0** | **2.1** | **1.5** | **977** | **1258** | **74.3** |  |  |  |  |  |  |
| **2010/7/6** | **31.7** | **28.4** | **0** | **1.9** | **1.3** | **1029** | **1149** | **76.3** |  |  |  |  |  |  |
| **2010/7/7** | **32.0** | **28.4** | **0** | **1.9** | **1.3** | **959** | **1012** | **74.3** |  |  |  |  |  |  |
| **2010/7/8** | **33.0** | **28.5** | **0** | **1.4** | **0.9** | **1032** | **1242** | **74.3** |  |  |  |  |  |  |
| **2010/7/9** | **31.5** | **25.8** | **0** | **1.6** | **1.1** | **1089** | **1302** | **76.3** |  |  |  |  |  |  |
| **2010/7/10** | **33.2** | **25.7** | **0** | **0.8** | **0.5** | **1056** | **1209** | **71.4** |  |  |  |  |  |  |
| **2010/7/11** | **32.3** | **27.0** | **0** | **1.1** | **0.8** | **1120** | **1228** | **73.3** |  |  |  |  |  |  |
| **2010/7/12** | **32.8** | **27.5** | **0** | **0.9** | **0.6** | **1023** | **1310** | **71.4** |  |  |  |  |  |  |
| 2010/7/13 | 33.2 | 27.5 | 0.25 | 1.3 |  | 1027 | 1147 | 70 |  |  |  |  |  |  |
| 2010/7/14 | 34.8 | 27.6 | 0 | 2.6 |  | 927 | 1110 | 71 |  |  |  |  |  |  |
| 2010/7/15 | 33.0 | 27.6 | 0.05 | 2.2 |  | 1010 | 1009 | 70 |  |  |  |  |  |  |
| 2010/7/16 | 32.5 | 24.8 | 1.76 | 3.6 |  | 1148 | 1101 | 75 |  |  |  |  |  |  |
| 2010/7/17 | 32.0 | 23.7 | 1.63 | 2.5 |  | 1139 | 1157 | 80 |  |  |  |  |  |  |
| 2010/7/18 | 33.1 | 24.7 | 0.39 | 1.6 |  | 1030 | 1049 | 74 |  |  |  |  |  |  |
| 2010/7/19 | 33.7 | 26.5 | 0 | 1.7 |  | 1020 | 1140 | 71 |  |  |  |  |  |  |
| 2010/7/20 | 33.7 | 27.2 | 0 | 1.4 |  | 996 | 1205 | 67 |  |  |  |  |  |  |
| 2010/7/21 | 31.2 | 25.1 | 2.05 | 2.6 |  | 980 | 1248 | 83 |  |  |  |  |  |  |
| 2010/7/22 | 29.5 | 24.8 | 3.13 | 3.3 |  | 838 | 1010 | 85 |  |  |  |  |  |  |
| 2010/7/23 | 31.6 | 25.0 | 1.02 | 1.9 |  | 849 | 1340 | 83 |  |  |  |  |  |  |
| 2010/7/24 | 32.1 | 25.6 | 0.47 | 1.9 |  | 1007 | 1126 | 80 |  |  |  |  |  |  |
| 2010/7/25 | 33.2 | 26.1 | 0 | 1.2 |  | 993 | 1235 | 77 |  |  |  |  |  |  |
| 2010/7/26 | 32.6 | 26.6 | 0.04 | 2.7 |  | 956 | 1241 | 78 |  |  |  |  |  |  |
| 2010/7/27 | 28.7 | 25.0 | 6.27 | 2.3 |  | 230 | 1238 | 90 |  |  |  |  |  |  |
| 2010/7/28 | 28.5 | 24.4 | 14.49 | 2.5 |  | 721 | 1121 | 92 |  |  |  |  |  |  |
| 2010/7/29 | 31.1 | 22.1 | 2.52 | 1.8 |  | 1146 | 1319 | 93 |  |  |  |  |  |  |
| 2010/7/30 | 31.9 | 23.1 | 0.07 | 1.2 |  | 1021 | 1157 | 84 |  |  |  |  |  |  |
| **2010/7/31** | **32.8** | **27.6** | **0** | **1.4** | **1.2** | **1057** | **1240** | **77.4** |  |  |  |  |  |  |
| **2010/8/1** | **34.1** | **27.6** | **0** | **0.5** | **0.5** | **1032** | **1122** | **80.5** |  |  |  |  |  |  |
| **2010/8/2** | **32.5** | **27.3** | **0** | **1.4** | **1.2** | **1019** | **1232** | **74.4** |  |  |  |  |  |  |
| **2010/8/3** | **32.8** | **26.9** | **0** | **2.5** | **2.1** | **1018** | **1132** | **75.4** |  |  |  |  |  |  |
| **2010/8/4** | **33.4** | **27.1** | **0** | **1.7** | **1.5** | **1011** | **1051** | **76.4** |  |  |  |  |  |  |
| **2010/8/5** | **35.0** | **24.2** | **0** | **1.5** | **1.3** | **859** | **1206** | **74.4** |  |  |  |  |  |  |
| **2010/8/6** | **32.1** | **24.0** | **0** | **1.2** | **1** | **730** | **1214** | **78.4** |  |  |  |  |  |  |
| **2010/8/7** | **33.5** | **26.8** | **0** | **1.5** | **1.3** | **849** | **1009** | **72.3** |  |  |  |  |  |  |
| **2010/8/8** | **33.0** | **27.4** | **0** | **1.5** | **1.3** | **1150** | **1255** | **73.3** |  |  |  |  |  |  |
| **2010/8/9** | **33.6** | **27.8** | **0** | **1.5** | **1.3** | **1002** | **1209** | **72.3** |  |  |  |  |  |  |
| **2010/8/10** | **33.8** | **27.2** | **0** | **0.8** | **0.7** | **1040** | **1212** | **76.4** |  |  |  |  |  |  |
| **2010/8/11** | **31.4** | **27.4** | **0** | **0.8** | **0.7** | **1059** | **1223** | **79.4** |  |  |  |  |  |  |
| **2010/8/12** | **32.8** | **27.0** | **0** | **2.1** | **1.8** | **1087** | **1152** | **73.3** |  |  |  |  |  |  |
| **2010/8/13** | **32.7** | **27.6** | **0** | **1.6** | **1.4** | **1042** | **1159** | **77.4** |  |  |  |  |  |  |
| **2010/8/14** | **32.7** | **27.6** | **0** | **0.9** | **0.8** | **1024** | **1133** | **78.4** |  |  |  |  |  |  |
| **2010/8/15** | **31.6** | **25.6** | **0** | **1.5** | **1.3** | **711** | **1158** | **81.5** |  |  |  |  |  |  |
| **2010/8/16** | **30.4** | **24.4** | **0** | **1.5** | **1.3** | **1264** | **1052** | **90.6** |  |  |  |  |  |  |
| **2010/8/17** | **31.8** | **24.9** | **0** | **0.9** | **0.8** | **1169** | **1300** | **83.5** |  |  |  |  |  |  |
| **2010/8/18** | **32.2** | **26.1** | **0** | **1.6** | **1.4** | **822** | **1353** | **75.4** |  |  |  |  |  |  |
| **2010/8/19** | **31.3** | **27.7** | **0** | **1.6** | **1.4** | **1010** | **1116** | **75.4** |  |  |  |  |  |  |
| **2010/8/20** | **32.8** | **25.5** | **0** | **1.5** | **1.3** | **997** | **1134** | **73.3** |  |  |  |  |  |  |
| 2010/8/21 | 33.6 | 26.9 | 0 | 1.7 |  | 923 | 1111 | 68 |  |  |  |  |  |  |
| 2010/8/22 | 33.4 | 28.2 | 0 | 3.0 |  | 970 | 1231 | 67 |  |  |  |  |  |  |
| 2010/8/23 | 31.7 | 26.7 | 0 | 2.6 |  | 1017 | 1221 | 71 |  |  |  |  |  |  |
| 2010/8/24 | 30.2 | 23.8 | 0.98 | 2.6 |  | 729 | 920 | 83 |  |  |  |  |  |  |
| 2010/8/25 | 31.5 | 25.7 | 0.21 | 1.3 |  | 1131 | 1245 | 76 |  |  |  |  |  |  |
| **2010/8/26** | **31.7** | **26.2** | **0** | **0.9** | **0.8** | **971** | **1121** | **82.9** |  |  |  |  |  |  |
| **2010/8/27** | **32.3** | **25.8** | **0** | **0.8** | **0.7** | **832** | **1120** | **77.6** |  |  |  |  |  |  |
| **2010/8/28** | **32.6** | **25.0** | **0** | **0.8** | **0.7** | **952** | **1220** | **78.7** |  |  |  |  |  |  |
| **2010/8/29** | **33.5** | **26.0** | **0** | **1.0** | **0.9** | **903** | **1136** | **74.5** |  |  |  |  |  |  |
| **2010/8/30** | **34.2** | **27.2** | **0** | **1.5** | **1.3** | **915** | **1157** | **67.1** |  |  |  |  |  |  |
| **2010/8/31** | **35.3** | **28.3** | **0** | **1.2** | **1.1** | **919** | **1200** | **56.6** |  |  |  |  |  |  |
| **2010/9/1** | **34.4** | **29.1** | **0** | **2.0** | **1.7** | **880** | **1203** | **53.5** |  |  |  |  |  |  |
| **2010/9/2** | **32.5** | **25.7** | **0** | **1.6** | **1.4** | **772** | **1344** | **69.2** |  |  |  |  |  |  |
| **2010/9/3** | **27.9** | **24.5** | **0** | **1.4** | **1.2** | **23** | **649** | **92.3** |  |  |  |  |  |  |
| **2010/9/4** | **27.8** | **23.9** | **0** | **0.9** | **0.8** | **295** | **1352** | **92.3** |  |  |  |  |  |  |
| **2010/9/5** | **32.7** | **25.9** | **0** | **0.8** | **0.7** | **996** | **1139** | **77.6** |  |  |  |  |  |  |
| **2010/9/6** | **32.4** | **26.4** | **0** | **1.2** | **1.1** | **880** | **1240** | **79.7** |  |  |  |  |  |  |
| **2010/9/7** | **31.9** | **27.3** | **0** | **1.2** | **1.1** | **872** | **1235** | **81.8** |  |  |  |  |  |  |
| **2010/9/8** | **34.7** | **28.0** | **0** | **1.4** | **1.2** | **822** | **1215** | **83.9** |  |  |  |  |  |  |
| **2010/9/9** | **31.8** | **24.5** | **0** | **0.9** | **0.8** | **846** | **1108** | **91.3** |  |  |  |  |  |  |
| **2010/9/10** | **32.0** | **23.3** | **0** | **1.1** | **1** | **890** | **1158** | **86** |  |  |  |  |  |  |
| **2010/9/11** | **29.1** | **24.1** | **0** | **0.6** | **0.5** | **1025** | **1216** | **96.5** |  |  |  |  |  |  |
| **2010/9/12** | **30.2** | **24.5** | **0** | **0.7** | **0.6** | **244** | **1036** | **93.3** |  |  |  |  |  |  |
| **2010/9/13** | **30.9** | **23.9** | **0** | **0.9** | **0.8** | **1037** | **1229** | **91.3** |  |  |  |  |  |  |
| **2010/9/14** | **31.5** | **25.7** | **0** | **1.2** | **1.1** | **999** | **1138** | **83.9** |  |  |  |  |  |  |
| 2010/9/15 | 33.0 | 25.6 | 0 | 2.1 |  | 972 | 1155 | 77 |  |  |  |  |  |  |
| 2010/9/16 | 33.2 | 25.7 | 0 | 1.7 |  | 792 | 1130 | 76 |  |  |  |  |  |  |
| 2010/9/17 | 32.5 | 25.9 | 0 | 2.4 |  | 718 | 1129 | 73 |  |  |  |  |  |  |
| 2010/9/18 | 33.1 | 26.9 | 0 | 3.9 |  | 868 | 1233 | 76 |  |  |  |  |  |  |
| 2010/9/19 | 34.4 | 25.6 | 0 | 1.4 |  | 874 | 1214 | 70 |  |  |  |  |  |  |
| 2010/9/20 | 32.6 | 24.7 | 3.13 | 2.5 |  | 925 | 1237 | 77 |  |  |  |  |  |  |
| 2010/9/21 | 26.5 | 23.4 | 5.19 | 2.9 |  | 179 | 1535 | 92 |  |  |  |  |  |  |
| 2010/9/22 | 27.1 | 23.0 | 1.36 | 1.9 |  | 127 | 856 | 88 |  |  |  |  |  |  |
| 2010/9/23 | 29.7 | 24.4 | 0.71 | 1.5 |  | 832 | 1330 | 88 |  |  |  |  |  |  |
| 2010/9/24 | 31.8 | 24.9 | 0.01 | 1.5 |  | 986 | 1038 | 76 |  |  |  |  |  |  |
| 2010/9/25 | 30.6 | 25.4 | 0 | 2.1 |  | 789 | 1017 | 79 |  |  |  |  |  |  |
| 2010/9/26 | 31.7 | 25.2 | 0 | 1.8 |  | 859 | 1109 | 71 |  |  |  |  |  |  |
| 2010/9/27 | 31.0 | 25.3 | 0 | 1.6 |  | 799 | 1053 | 76 |  |  |  |  |  |  |
| 2010/9/28 | 32.4 | 25.9 | 0 | 2.1 |  | 858 | 1207 | 72 |  |  |  |  |  |  |
| 2010/9/29 | 31.5 | 26.9 | 0 | 2.2 |  | 846 | 1055 | 70 |  |  |  |  |  |  |
| 2010/9/30 | 28.9 | 24.3 | 0.84 | 2.2 |  | 750 | 1406 | 81 |  |  |  |  |  |  |
| 2010/10/1 | 30.6 | 24.4 | 0.23 | 3.3 |  | 965 | 1219 | 75 |  |  |  |  |  |  |
| 2010/10/2 | 31.6 | 25.1 | 0.11 | 2.5 |  | 994 | 1206 | 71 |  |  |  |  |  |  |
| 2010/10/3 | 30.3 | 25.4 | 0 | 3.5 |  | 1021 | 1026 | 62 |  |  |  |  |  |  |
| 2010/10/4 | 28.2 | 22.9 | 0 | 3.1 |  | 644 | 1101 | 52 |  |  |  |  |  |  |
| 2010/10/5 | 25.1 | 23.0 | 0 | 2.6 |  | 666 | 1029 | 54 |  |  |  |  |  |  |
| 2010/10/6 | 27.1 | 21.5 | 0.02 | 1.9 |  | 1135 | 1038 | 70 |  |  |  |  |  |  |
| 2010/10/7 | 27.7 | 23.3 | 0 | 2.3 |  | 635 | 902 | 63 |  |  |  |  |  |  |
| 2010/10/8 | 28.9 | 24.1 | 0 | 2.2 |  | 916 | 1100 | 67 |  |  |  |  |  |  |
| 2010/10/9 | 26.3 | 23.5 | 1 | 2.0 |  | 209 | 1309 | 85 |  |  |  |  |  |  |
| 2010/10/10 | 26.2 | 23.3 | 0.1 | 2.4 |  | 886 | 1039 | 84 |  |  |  |  |  |  |
| 2010/10/11 | 29.9 | 25.2 | 0 | 2.9 |  | 1064 | 1331 | 83 |  |  |  |  |  |  |
| 2010/10/12 | 32.0 | 25.2 | 0 | 1.8 |  | 976 | 1117 | 77 |  |  |  |  |  |  |
| 2010/10/13 | 32.1 | 25.0 | 0 | 2.3 |  | 710 | 1055 | 73 |  |  |  |  |  |  |
| 2010/10/14 | 31.8 | 26.0 | 0 | 1.6 |  | 715 | 1030 | 75 |  |  |  |  |  |  |
| 2010/10/15 | 27.7 | 23.3 | 2.32 | 2.7 |  | 1031 | 1229 | 74 |  |  |  |  |  |  |
| 2010/10/16 | 27.1 | 22.3 | 0 | 2.7 |  | 1097 | 1133 | 68 |  |  |  |  |  |  |
| 2010/10/17 | 29.6 | 23.4 | 0 | 2.1 |  | 1004 | 1142 | 70 |  |  |  |  |  |  |
| 2010/10/18 | 29.6 | 24.1 | 0 | 2.5 |  | 829 | 1247 | 65 |  |  |  |  |  |  |
| 2010/10/19 | 28.5 | 23.2 | 0 | 2.5 |  | 803 | 1157 | 57 |  |  |  |  |  |  |
| 2010/10/20 | 28.3 | 23.9 | 0 | 4.0 |  | 898 | 1121 | 56 |  |  |  |  |  |  |
| 2010/10/21 | 27.1 | 23.1 | 0 | 5.7 |  | 975 | 1232 | 62 |  |  |  |  |  |  |
| 2010/10/22 | 24.6 | 21.0 | 0 | 3.1 |  | 827 | 1156 | 62 |  |  |  |  |  |  |
| 2010/10/23 | 28.0 | 20.9 | 0 | 2.4 |  | 795 | 1142 | 56 |  |  |  |  |  |  |
| 2010/10/24 | 27.9 | 21.3 | 0 | 1.7 |  | 930 | 1226 | 62 |  |  |  |  |  |  |
| 2010/10/25 | 26.7 | 22.4 | 0 | 3.0 |  | 850 | 948 | 62 |  |  |  |  |  |  |
| 2010/10/26 | 24.5 | 19.8 | 0 | 4.5 |  | 146 | 1139 | 65 |  |  |  |  |  |  |
| 2010/10/27 | 21.4 | 16.9 | 0 | 4.0 |  | 790 | 1151 | 54 |  |  |  |  |  |  |
| 2010/10/28 | 21.0 | 14.4 | 0 | 3.6 |  | 796 | 1137 | 47 |  |  |  |  |  |  |
| 2010/10/29 | 21.5 | 15.0 | 0 | 3.3 |  | 786 | 1144 | 41 |  |  |  |  |  |  |
| 2010/10/30 | 21.7 | 14.9 | 0 | 3.6 |  | 778 | 1134 | 39 |  |  |  |  |  |  |
| 2010/10/31 | 24.5 | 15.8 | 0 | 2.8 |  | 788 | 1154 | 40 |  |  |  |  |  |  |
| 2010/11/1 | 25.2 | 16.1 | 0 | 1.6 |  | 798 | 1131 | 53 |  |  |  |  |  |  |
| 2010/11/2 | 25.1 | 17.0 | 0 | 2.4 |  | 780 | 1201 | 59 |  |  |  |  |  |  |
| 2010/11/3 | 24.7 | 17.3 | 0 | 2.6 |  | 749 | 1139 | 56 |  |  |  |  |  |  |
| 2010/11/4 | 21.8 | 17.0 | 0.2 | 2.3 |  | 810 | 1135 | 56 |  |  |  |  |  |  |
| 2010/11/5 | 19.4 | 16.1 | 0.83 | 1.3 |  | 372 | 1102 | 90 |  |  |  |  |  |  |
| 2010/11/6 | 20.5 | 16.3 | 1.4 | 1.7 |  | 733 | 1317 | 91 |  |  |  |  |  |  |
| 2010/11/7 | 27.2 | 18.2 | 0 | 1.6 |  | 731 | 1122 | 74 |  |  |  |  |  |  |
| 2010/11/8 | 26.9 | 18.8 | 0 | 1.5 |  | 789 | 1156 | 54 |  |  |  |  |  |  |
| 2010/11/9 | 25.5 | 18.9 | 0 | 2.7 |  | 749 | 1138 | 44 |  |  |  |  |  |  |
| 2010/11/10 | 26.5 | 17.3 | 0 | 2.4 |  | 837 | 1146 | 64 |  |  |  |  |  |  |
| 2010/11/11 | 26.7 | 16.4 | 0 | 1.2 |  | 725 | 1213 | 50 |  |  |  |  |  |  |
| 2010/11/12 | 26.8 | 17.4 | 0 | 2.4 |  | 747 | 1142 | 58 |  |  |  |  |  |  |
| 2010/11/13 | 27.2 | 18.8 | 0 | 1.8 |  | 879 | 1125 | 64 |  |  |  |  |  |  |
| 2010/11/14 | 27.5 | 19.9 | 0 | 1.6 |  | 791 | 1240 | 72 |  |  |  |  |  |  |
| 2010/11/15 | 27.1 | 21.9 | 0 | 2.3 |  | 626 | 936 | 70 |  |  |  |  |  |  |
| 2010/11/16 | 24.6 | 19.4 | 0 | 2.3 |  | 648 | 1209 | 65 |  |  |  |  |  |  |
| 2010/11/17 | 23.6 | 16.3 | 0 | 3.3 |  | 678 | 1122 | 63 |  |  |  |  |  |  |
| 2010/11/18 | 25.2 | 19.3 | 0 | 2.5 |  | 658 | 1149 | 67 |  |  |  |  |  |  |
| 2010/11/19 | 25.2 | 18.3 | 0 | 1.7 |  | 653 | 1138 | 69 |  |  |  |  |  |  |
| 2010/11/20 | 23.6 | 17.7 | 0 | 2.5 |  | 696 | 1136 | 67 |  |  |  |  |  |  |
| 2010/11/21 | 26.6 | 18.8 | 0 | 2.3 |  | 708 | 1124 | 73 |  |  |  |  |  |  |
| 2010/11/22 | 25.8 | 19.4 | 0 | 1.9 |  | 656 | 1204 | 73 |  |  |  |  |  |  |
| 2010/11/23 | 24.8 | 17.4 | 0 | 1.8 |  | 650 | 1149 | 60 |  |  |  |  |  |  |
| 2010/11/24 | 24.0 | 17.9 | 0 | 2.0 |  | 786 | 1208 | 69 |  |  |  |  |  |  |
| 2010/11/25 | 23.5 | 17.5 | 0 | 2.8 |  | 669 | 1130 | 54 |  |  |  |  |  |  |
| 2010/11/26 | 23.5 | 16.3 | 0 | 2.2 |  | 654 | 1154 | 49 |  |  |  |  |  |  |
| 2010/11/27 | 24.0 | 17.5 | 0 | 1.9 |  | 647 | 1317 | 67 |  |  |  |  |  |  |
| 2010/11/28 | 25.9 | 18.3 | 0 | 1.9 |  | 831 | 1143 | 62 |  |  |  |  |  |  |
| 2010/11/29 | 25.4 | 17.9 | 0 | 1.3 |  | 552 | 1201 | 74 |  |  |  |  |  |  |
| 2010/11/30 | 25.0 | 18.6 | 0 | 1.6 |  | 628 | 1213 | 69 |  |  |  |  |  |  |
| 2010/12/1 | 25.0 | 17.2 | 0 | 2.2 |  | 682 | 1153 | 63 |  |  |  |  |  |  |
| 2010/12/2 | 25.5 | 17.7 | 0 | 1.7 |  | 672 | 1138 | 64 |  |  |  |  |  |  |
| 2010/12/3 | 25.2 | 18.0 | 0 | 2.5 |  | 689 | 1138 | 49 |  |  |  |  |  |  |
| 2010/12/4 | 25.1 | 17.8 | 0 | 1.7 |  | 638 | 1157 | 52 |  |  |  |  |  |  |
| 2010/12/5 | 28.0 | 18.5 | 0 | 1.8 |  | 724 | 1009 | 65 |  |  |  |  |  |  |
| 2010/12/6 | 27.3 | 20.6 | 0 | 2.1 |  | 603 | 1156 | 57 |  |  |  |  |  |  |
| 2010/12/7 | 24.5 | 17.3 | 0 | 3.6 |  | 585 | 1151 | 44 |  |  |  |  |  |  |
| 2010/12/8 | 20.1 | 13.2 | 0 | 2.4 |  | 674 | 1147 | 30 |  |  |  |  |  |  |
| 2010/12/9 | 21.1 | 12.6 | 0 | 2.4 |  | 985 | 1204 | 37 |  |  |  |  |  |  |
| 2010/12/10 | 22.5 | 16.1 | 0 | 2.5 |  | 197 | 1109 | 64 |  |  |  |  |  |  |
| 2010/12/11 | 21.4 | 17.6 | 0 | 1.9 |  | 112 | 919 | 64 |  |  |  |  |  |  |
| 2010/12/12 | 20.7 | 18.7 | 0 | 3.3 |  | 324 | 1052 | 77 |  |  |  |  |  |  |
| 2010/12/13 | 26.7 | 20.2 | 0 | 2.0 |  | 698 | 1235 | 82 |  |  |  |  |  |  |
| 2010/12/14 | 22.7 | 20.0 | 0 | 2.2 |  | 145 | 1226 | 83 |  |  |  |  |  |  |
| 2010/12/15 | 20.6 | 12.9 | 0.98 | 3.4 |  | 66 | 922 | 86 |  |  |  |  |  |  |
| 2010/12/16 | 12.9 | 5.9 | 0.6 | 5.8 |  | 544 | 1436 | 70 |  |  |  |  |  |  |
| 2010/12/17 | 14.4 | 2.4 | 0 | 2.4 |  | 722 | 1132 | 46 |  |  |  |  |  |  |
| 2010/12/18 | 19.1 | 7.4 | 0 | 1.7 |  | 670 | 1135 | 50 |  |  |  |  |  |  |
| 2010/12/19 | 23.8 | 14.2 | 0 | 1.2 |  | 642 | 1131 | 64 |  |  |  |  |  |  |
| 2010/12/20 | 24.4 | 16.7 | 0 | 1.0 |  | 771 | 1100 | 70 |  |  |  |  |  |  |
| 2010/12/21 | 24.6 | 18.4 | 0 | 1.3 |  | 789 | 1258 | 66 |  |  |  |  |  |  |
| 2010/12/22 | 23.7 | 17.1 | 0 | 2.3 |  | 637 | 1205 | 52 |  |  |  |  |  |  |
| 2010/12/23 | 24.5 | 14.3 | 0 | 1.8 |  | 676 | 941 | 59 |  |  |  |  |  |  |
| 2010/12/24 | 22.1 | 16.3 | 0 | 2.2 |  | 713 | 1058 | 66 |  |  |  |  |  |  |
| 2010/12/25 | 18.5 | 10.2 | 0 | 3.9 |  | 81 | 1358 | 78 |  |  |  |  |  |  |
| 2010/12/26 | 14.8 | 7.7 | 0.05 | 3.3 |  | 693 | 1204 | 55 |  |  |  |  |  |  |
| 2010/12/27 | 18.7 | 7.7 | 0 | 1.8 |  | 694 | 1143 | 40 |  |  |  |  |  |  |
| 2010/12/28 | 22.2 | 9.8 | 0 | 1.3 |  | 650 | 1124 | 55 |  |  |  |  |  |  |
| 2010/12/29 | 23.9 | 12.0 | 0 | 1.5 |  | 623 | 1205 | 58 |  |  |  |  |  |  |
| 2010/12/30 | 21.2 | 14.0 | 0 | 2.8 |  | 662 | 1211 | 51 |  |  |  |  |  |  |
| 2010/12/31 | 18.7 | 12.1 | 0 | 3.5 |  | 678 | 1204 | 24 |  |  |  |  |  |  |
|  |  |  |  |  |  |  |  |  |  |  |  |  |  |  |

The sites areChangshu (CS), Danyang (DY), Fengqiu with paddy rice fields (FQP), Shenzhen (SZ), and Yingtan (YTA). *T*max, *T*min, *P*, *W*, *R*max, *M*, *R*ave and RH denote the maximum and minimum daily air temperature (°C), daily precipitation (cm d−1), wind speed (m s−1), maximum daily solar radiation (W m−2), the moment of *R*max appearing (*M*, hour), average daily solar radiation (W m−2), and average daily relative humidity (%), respectively. The bold texts indicate the exact period(s) with daily observations of ammonia fluxes at each field site. The definitions of the case codes are referred to Table 2. *W* * is for the simulation of P11, P13, P15 and P17 at Shenzhen. *W* # is for the simulation of P12, P14, P16 and P18 at Shenzhen. The definitions of the case codes are referred to Table 3. For *R*max and*M* with @ are lack of measurement, and thus *R*max is arbitrarily set by referring to the average of the *R*max value of the day before and after; *M* is arbitrarily set at 12:00 o’clock this study.
