# Supplementary material for: Update a biogeochemical model with process-based algorithms to predict ammonia volatilization from fertilized uplands and rice paddy fields
Source: Copernicus journal article supplement (doi:10.5194/bg-2021-341), 2022-01-17
Supplement: Supplementary file 5 [file Table S4.docx]

**Table S4** Sources of the daily meteorological data of individual paddy rice field sites for each period with ammonia observation (PAO) and for those beyond the PAO, and simulation configurations.

| Changshu |  |
| --- | --- |
| PAO | The maximum daily air temperature (*T*max, ℃), the minimum daily air temperature (*T*min, ℃), the average daily wind speed (*W*, m s−1) and the average daily relative humidity (RH, %) in 2002/2003 and daily precipitation (*P*, mm d−1) in 2003: Measured in Nantong (station no.: 58259; downloaded from the online database of China Meteorological Administration (CMA, http://www.data.cma.cn).  Daily precipitation (*P*, mm d−1) in 2002: Adapted from the observations in Nantong (station no.: 58259; downloaded from CMA) by referring to the periodically maximum value (45.2 mm) from 06/22 to 06/30, the periodically few amount (< 5 mm, arbitrarily) from 07/20 to 07/29, and the total value (29.1 mm) from 08/20 to 08/31 measured onsite by Song et al. (2004).  The maximum daily solar radiation (*R*max, W m−2) and the moment of *R*max appearing (*M*, hour) in 2002/2003: Measured in Shanghai (station no.: 58362; downloaded from CMA). |
| Beyond PAO | *T*max, *T*min, *P*, *W* and RH in 2002/2003: Measured in Nantong (station no.: 58259; downloaded from CMA).  *R*max and *M* in 2002/2003: Measured in Shanghai (station no.: 58362; downloaded from CMA). |
| Configuration | Ten years for spin-up, which was driven by the inputs of 2002; the last 2 years (2002−2003) for simulation. |
| Danyang |  |
| PAO | *T*max and *T*min in 1984: Measured in Changzhou (station no.: 58343; downloaded from CMA).  *P* in 1984: No precipitation, measured onsite by Cai et al. (1986).  *W* in 1984: Adapted from the observations in Changzhou (station no.: 58343; downloaded from CMA) by referring to the periodically low values (1 m s−1, arbitrarily) from 06/20 to 06/27 measured onsite by Cai et al. (1986).  RH in 1984: Measured in Gaoyou (station no.: 58241; downloaded from CMA).  The average daily solar radiation (*R*ave, W m−2) in 1984: Measured in Nanjing (station no.: 58238; downloaded from CMA). |
| Beyond PAO | *T*max, *T*min, *P* and *W* in 1984: Measured in Changzhou (station no.: 58343; downloaded from CMA).  RH in 1984: Measured in Gaoyou (station no.: 58241; downloaded from CMA).  *R*ave in 1984: Measured in Nanjing (station no.: 58238; downloaded from CMA). |
| Configuration | Ten years for spin-up, which was driven by the inputs of 1984; the last year (1984) for simulation. |
| Fengqiu |  |
| PAO | *T*max, *T*min, *P*, *W* and RH in 1986: Measured in Kaifeng (station no.: 57091; downloaded from CMA).  *R*ave in 1986: Measured in Zhengzhou (station no.: 57083; downloaded from CMA). |
| Beyond PAO | *T*max, *T*min, *P*, *W* and RH in 1986: Measured in Kaifeng (station no.: 57091; downloaded from CMA).  *R*ave in 1986: Measured in Zhengzhou (station no.: 57083; downloaded from CMA). |
| Configuration | Ten years for spin-up, which was driven by the inputs of 1986; the last year (1986) for simulation. |
| Shenzhen |  |
| PAO | *T*max and *T*min in 2010: Measured in Shenzhen (station no.: 59493; downloaded from CMA).  *P* in 2010: No data because the wind tunnel could not receive rainfall (Gong et al., 2013).  *W* in 2010: Adapted from the observations in Shenzhen (station no.: 59493; downloaded from CMA) by referring to periodically average value 1.4 m s−1 (for P11 and P12 cases) from 05/16 to 06/04, 1.3 m s−1 (for P13 case) from 06/22 to 07/11, 0.89 m s−1 (for P14 case) from 06/22 to 07/11, 1.4 m s−1 (for P15 case) from 07/31 to 08/19, 1.2 m s−1 (for P16 case) from 07/31 to 08/19, 1.1 m s−1 (for P17 case) from 08/26 to 09/14, 0.96 m s−1 (for P18 case) from 08/26 to 09/14 inside the wind tunnel measured onsite by Gong et al. (2013).  RH: Adapted from the observations in Shenzhen (station no.: 59493;downloaded from CMA) by referring to the periodically average value (77.7 %, 76.5 %, 77.3 %, 75.8 %, 77.1 %, 76.2 %, 80.5 % and 79.5 %) from 05/16 to 06/04 (for P11 case),  from 05/16 to 06/04 (for P12 case), from 06/22 to 07/11 (for P13 case), from 06/22 to 07/11 (for P14 case), from 07/31 to 08/19 (for P15 case), from 07/31 to 08/19 (for P16 case), from 08/26 to 09/14 (for P17 case) and from 08/26 to 09/14 (for P18 case) measured onsite by Gong et al. (2013).  *R*max and *M* in 2010: Measured in Guangzhou (station no.: 59287; downloaded from CMA). |
| Beyond PAO | *T*max, *T*min, *P*, *W* and RH in 2010: Measured in Shenzhen (station no.: 59493; downloaded from CMA).  *R*max and *M* in 2010: Measured in Guangzhou (station no.: 59287; downloaded from CMA). |
| Configuration | Ten years for spin-up, which was driven by the inputs of 2010; the last year (2010) for simulation. |
| Yingtan |  |
| PAO | *T*max, *T*min, *P*, *W* and RH in 1992: Measured in Guixi (station no.: 58626; downloaded from CMA).  *R*ave in 1992: Measured in Jianou (station no.: 58737; downloaded from CMA). |
| Beyond PAO | *T*max, *T*min, *P*, *W* and RH in 1992: Measured in Guixi (station no.: 58626; downloaded from CMA).  *R*ave in 1992: Measured in Jianou (station no.: 58737; downloaded from CMA). |
| Configuration | Ten years for spin-up, which was driven by the inputs of 1992; the last year (1992) for simulation. |

The definitions of the case codes are referred to Table 2.

**Reference:**

Cai, G., Zhu, Z., Trevitt, A., Freney, J.R., Simpson, J.R., 1986. Nitrogen loss from ammonium bicarbonate and urea fertilizers applied to flooded rice. Fertilizer Research 10, 203–215.

Gong, W., Zhang, Y., Huang, X., Luan, S., 2013. High–resolution measurement of ammonia emissions from fertilization of vegetable and rice crops in the Pearl River Delta Region, China. Atmospheric Environment 65, 1–10.

Song, Y., Fan, X., Lin, D., Yang, L., Zhou, J., 2004. Ammonia volatilization from paddy fields in the Taihu lake region and its influencing factors. Acta Pedologica Sinica, 265–269.
