# Supplementary material for: Update a biogeochemical model with process-based algorithms to predict ammonia volatilization from fertilized uplands and rice paddy fields
Source: Copernicus journal article supplement (doi:10.5194/bg-2021-341), 2022-01-17
Supplement: Supplementary file [file bg-2021-341-AC1-supplement.zip]

**Table S95** Settings of the meteorological variables, soil properties and management practices as model inputs for the sensitivity analysis of ammonia volatilization from the upland and rice paddy field cases.

| Items                      |                                          | Upland case (U37) <sup>a</sup> |                |                         | Rice paddy filed case (P4) <sup>a</sup> |                |                         |
|----------------------------|------------------------------------------|--------------------------------|----------------|-------------------------|-----------------------------------------|----------------|-------------------------|
|                            |                                          | Baseline                       | Lower bounds   | Upper bounds            | Baseline                                | Lower bounds   | Upper bounds            |
| Meteorological variables   | $T_{\text{air}}$ (°C) <sup>b</sup>       | 30.5                           | 27.5/28.5/29.5 | 31.5/32.5/33.5          | 25.0                                    | 22.0/23.0/24.0 | 26.0/27.0/28.0          |
|                            | $P$ (cm) <sup>b</sup>                    | 4.0                            | 2.8/3.2/3.6    | 4.4/4.8/5.2             | 6.5                                     | 4.6/5.2/5.9    | 7.2/7.8/8.5             |
|                            | $W$ (m s <sup>-1</sup> ) <sup>b</sup>    | 1.5                            | 1.1/1.2/1.4    | 1.7/1.8/2.0             | 1.9                                     | 1.3/1.5/1.7    | 2.1/2.3/2.5             |
|                            | $R$ (W m <sup>-2</sup> ) <sup>b</sup>    | 303                            | 212/242/273    | 333/364/394             | 264                                     | 185/211/238    | 291/317/343             |
| Soil properties            | Clay (%)                                 | 15.3                           | 10.7/12.2/13.8 | 16.8/18.4/19.9          | 20.6                                    | 14.4/16.5/18.5 | 22.7/24.7/26.8          |
|                            | pH                                       | 8.2                            | 7.3/7.6/7.9    | 8.5/8.8/8.9             | 7.1                                     | 6.2/6.5/6.8    | 7.4/7.8/8.1             |
|                            | SOC (g C kg <sup>-1</sup> ) <sup>b</sup> | 8.5                            | 6.0/6.8/7.7    | 9.4/10.2/11.1           | 25.5                                    | 17.9/20.4/23.0 | 28.1/30.6/33.2          |
|                            | BD (g cm <sup>-3</sup> ) <sup>b</sup>    | 1.32                           | 1.17/1.22/1.27 | 1.37/1.42/1.47          | 1.04                                    | 0.89/0.94/0.99 | 1.09/1.14/1.19          |
| Field management practices | Irrigation amount (cm)                   | 0                              | —              | 0.2/0.5/5               | —                                       | —              | —                       |
|                            | Floodwater depth (cm)                    | —                              | —              | —                       | 4                                       | 2.8/3.2/3.6    | 4.4/4.8/5.2             |
|                            | N type                                   | Urea                           | —              | ABC <sup>b</sup> /Other | Urea                                    | —              | ABC <sup>b</sup> /Other |
|                            | N dose (kg N ha <sup>-1</sup> )          | 148.3                          | 104/119/133    | 163/178/193             | 81                                      | 57/65/73       | 89/97/105               |
|                            | N depth (cm)                             | 0                              | —              | 5/10/15                 | 0                                       | —              | 5/10/15                 |

<sup>a</sup> The definitions of the case codes U37 and P4 are referred to Table 2 and Table S6, respectively.

<sup>b</sup>  $T_{\text{air}}$  and  $W$  are 3-hourly averages of air temperature and wind speed during measurement periods of ammonia volatilization, respectively.  $P$  and  $R$  are 3-hourly totals of precipitation and solar radiation during measurement periods of ammonia volatilization, respectively. SOC and BD are the abbreviations of soil organic carbon content and bulk density, respectively. ABC is the abbreviation of ammonium bicarbonate. Other stands for ammonium-based nitrogen (N) fertilizers excluding ABC.
