# Supplementary material for: Update a biogeochemical model with process-based algorithms to predict ammonia volatilization from fertilized uplands and rice paddy fields
Source: Copernicus journal article supplement (doi:10.5194/bg-2021-341), 2022-01-17
Supplement: Supplementary file [file bg-2021-341-AC1-supplement.zip]

**Table S51** Daily meteorological variables for individual rice paddy field sites in the year(s) with observations of ammonia volatilization.

| CS        |            |            |      |     |            |      |     | DY        |            |            |      |     |                  |    |
|-----------|------------|------------|------|-----|------------|------|-----|-----------|------------|------------|------|-----|------------------|----|
| Date      | $T_{\max}$ | $T_{\min}$ | $P$  | $W$ | $R_{\max}$ | $M$  | RH  | Date      | $T_{\max}$ | $T_{\min}$ | $P$  | $W$ | $R_{\text{ave}}$ | RH |
| 2002/1/1  | 9.6        | 1.6        | 0    | 2.5 | 602        | 1225 | 75  | 1984/1/1  | 4.4        | −5.7       | 0    | 0.8 | 128.7            | 70 |
| 2002/1/2  | 8.7        | −1.4       | 0    | 1.5 | 575        | 1214 | 74  | 1984/1/2  | 7.4        | −3.3       | 0    | 2.3 | 121.8            | 76 |
| 2002/1/3  | 13.0       | −0.8       | 0    | 1.8 | 507        | 1157 | 71  | 1984/1/3  | 3.4        | −1.9       | 0    | 3.8 | 131.9            | 58 |
| 2002/1/4  | 13.9       | 2.7        | 0    | 3.0 | 570        | 1207 | 66  | 1984/1/4  | 1.4        | −5.1       | 0    | 1.5 | 63.2             | 57 |
| 2002/1/5  | 15.7       | 1.6        | 0    | 1.5 | 541        | 1132 | 73  | 1984/1/5  | 4.2        | −6.0       | 0    | 1   | 140              | 68 |
| 2002/1/6  | 15.4       | 3.6        | 0    | 2.3 | 532        | 1128 | 78  | 1984/1/6  | 6.4        | −1.7       | 0    | 0.8 | 119.2            | 70 |
| 2002/1/7  | 11.7       | 2.6        | 0    | 4.3 | 600        | 1147 | 48  | 1984/1/7  | 7.5        | −3.5       | 0    | 1.5 | 117.1            | 77 |
| 2002/1/8  | 8.0        | −3.3       | 0    | 1.0 | 641        | 1202 | 48  | 1984/1/8  | 9.5        | −3.2       | 0    | 2   | 129.9            | 57 |
| 2002/1/9  | 11.0       | −2.6       | 0    | 3.0 | 591        | 1137 | 60  | 1984/1/9  | 12.4       | −2.5       | 0    | 2   | 131.6            | 48 |
| 2002/1/10 | 16.3       | 4.0        | 0    | 1.8 | 538        | 1232 | 72  | 1984/1/10 | 14.5       | −1.4       | 0    | 1.8 | 130.9            | 61 |
| 2002/1/11 | 17.9       | 2.8        | 0    | 1.3 | 446        | 1200 | 80  | 1984/1/11 | 10.8       | 1.6        | 0    | 3.3 | 97.9             | 69 |
| 2002/1/12 | 15.5       | 5.4        | 0    | 1.3 | 593        | 1111 | 91  | 1984/1/12 | 12.2       | 3.2        | 0    | 2   | 102              | 75 |
| 2002/1/13 | 19.5       | 7.6        | 0    | 1.3 | 540        | 1225 | 90  | 1984/1/13 | 10.2       | −0.7       | 0    | 1   | 117.7            | 75 |
| 2002/1/14 | 20.1       | 10.5       | 0    | 1.5 | 478        | 1216 | 91  | 1984/1/14 | 15.4       | 0.8        | 0    | 2.8 | 87.2             | 74 |
| 2002/1/15 | 17.8       | 14.7       | 0.01 | 1.8 | 70         | 1449 | 100 | 1984/1/15 | 10.4       | 0.3        | 0.15 | 4.8 | 20.5             | 61 |
| 2002/1/16 | 16.6       | 3.2        | 0.46 | 4.5 | 37         | 941  | 91  | 1984/1/16 | 2.2        | −4.5       | 0    | 2.3 | 143.3            | 46 |
| 2002/1/17 | 4.1        | 0.5        | 0.03 | 3.5 | 258        | 1103 | 87  | 1984/1/17 | 2.3        | −0.2       | 0.29 | 3.8 | 13.9             | 69 |
| 2002/1/18 | 5.9        | 0.4        | 1.01 | 3.0 | 343        | 1300 | 90  | 1984/1/18 | 0.5        | 0.1        | 4.12 | 3.8 | 0                | 99 |
| 2002/1/19 | 7.1        | 1.1        | 0    | 1.8 | 696        | 1219 | 78  | 1984/1/19 | 2.3        | −0.3       | 0.32 | 2.8 | 82.3             | 82 |
| 2002/1/20 | 9.0        | 2.0        | 0    | 2.5 | 635        | 1029 | 69  | 1984/1/20 | −0.1       | −1.9       | 0    | 2.3 | 69.2             | 73 |
| 2002/1/21 | 7.8        | 1.4        | 0    | 3.8 | 636        | 1135 | 50  | 1984/1/21 | 1.1        | −4.3       | 0    | 1.5 | 92.7             | 83 |
| 2002/1/22 | 8.5        | 1.0        | 0    | 2.8 | 654        | 1231 | 44  | 1984/1/22 | −0.6       | −6.3       | 0    | 1   | 117.4            | 64 |

|           |      |      |      |     |     |      |    |           |     |      |      |     |       |    |
|-----------|------|------|------|-----|-----|------|----|-----------|-----|------|------|-----|-------|----|
| 2002/1/23 | 5.2  | -0.4 | 0    | 2.8 | 670 | 1206 | 64 | 1984/1/23 | 1.5 | -6.8 | 0    | 1.5 | 103.2 | 79 |
| 2002/1/24 | 7.9  | -2.9 | 0    | 1.8 | 824 | 1152 | 76 | 1984/1/24 | 1.9 | -3.2 | 0    | 2.5 | 106.2 | 74 |
| 2002/1/25 | 6.5  | 2.8  | 0.37 | 3.8 | 151 | 1047 | 88 | 1984/1/25 | 2.9 | -3.7 | 0    | 1.3 | 109.4 | 81 |
| 2002/1/26 | 6.7  | 3.5  | 0.44 | 4.3 | 123 | 1549 | 88 | 1984/1/26 | 2.4 | -2.8 | 0    | 3.3 | 160.5 | 77 |
| 2002/1/27 | 8.1  | 2.4  | 0    | 2.8 | 540 | 1206 | 78 | 1984/1/27 | 2.8 | -1.3 | 0    | 3.3 | 105.2 | 76 |
| 2002/1/28 | 7.4  | -1.0 | 0    | 1.5 | 598 | 1214 | 73 | 1984/1/28 | 2.3 | 0.1  | 0.01 | 2.5 | 48.5  | 80 |
| 2002/1/29 | 7.9  | -1.6 | 0    | 1.3 | 638 | 1222 | 69 | 1984/1/29 | 0.6 | -1.6 | 0.35 | 3.8 | 0     | 86 |
| 2002/1/30 | 9.3  | 0.2  | 0    | 2.0 | 566 | 1200 | 64 | 1984/1/30 | 1   | -0.5 | 0.38 | 3.3 | 3.5   | 93 |
| 2002/1/31 | 8.5  | -1.2 | 0    | 1.3 | 741 | 1134 | 78 | 1984/1/31 | 2.5 | -0.6 | 0.05 | 1.3 | 115.3 | 69 |
| 2002/2/1  | 10.5 | 0.8  | 0    | 1.8 | 582 | 1152 | 75 | 1984/2/1  | 3.4 | -3.8 | 0    | 1.5 | 98.8  | 87 |
| 2002/2/2  | 11.7 | 1.0  | 0    | 2.3 | 664 | 1209 | 61 | 1984/2/2  | 2   | -2.4 | 0    | 4.8 | 119.4 | 62 |
| 2002/2/3  | 12.9 | -1.8 | 0    | 1.3 | 682 | 1244 | 75 | 1984/2/3  | 1.8 | -4.0 | 0    | 2.5 | 149   | 67 |
| 2002/2/4  | 10.1 | 2.3  | 0    | 2.8 | 341 | 1138 | 90 | 1984/2/4  | 2.6 | 0.1  | 0.2  | 1.8 | 0     | 90 |
| 2002/2/5  | 13.4 | 3.8  | 0    | 1.0 | 647 | 1222 | 84 | 1984/2/5  | 3   | 1.7  | 0.26 | 3   | 0     | 80 |
| 2002/2/6  | 15.2 | 2.5  | 0    | 1.0 | 598 | 1312 | 82 | 1984/2/6  | 2.1 | -3.6 | 0    | 3.5 | 128.2 | 52 |
| 2002/2/7  | 14.9 | 4.7  | 0    | 2.5 | 530 | 1224 | 80 | 1984/2/7  | 1.7 | -4.9 | 0    | 2   | 169.8 | 52 |
| 2002/2/8  | 15.5 | 6.9  | 0    | 3.5 | 538 | 1254 | 83 | 1984/2/8  | 4.1 | -4.9 | 0    | 1.5 | 157.6 | 63 |
| 2002/2/9  | 7.3  | 1.6  | 0    | 3.0 | 877 | 1251 | 72 | 1984/2/9  | 2.5 | -0.9 | 0    | 2.3 | 52.2  | 69 |
| 2002/2/10 | 11.1 | 1.1  | 0    | 3.0 | 710 | 1219 | 65 | 1984/2/10 | 1.2 | -1.0 | 0.2  | 2.5 | 0     | 92 |
| 2002/2/11 | 12.6 | 0.3  | 0    | 1.8 | 701 | 1230 | 60 | 1984/2/11 | 3.8 | 0.7  | 0.1  | 1.5 | 20.6  | 95 |
| 2002/2/12 | 16.0 | 5.2  | 0    | 2.5 | 738 | 1150 | 58 | 1984/2/12 | 3.5 | 2.2  | 0.05 | 0.8 | 12.3  | 93 |
| 2002/2/13 | 12.9 | 4.9  | 0    | 3.3 | 721 | 1048 | 71 | 1984/2/13 | 6.7 | 1    | 0    | 3   | 42.5  | 79 |
| 2002/2/14 | 10.0 | 5.6  | 0    | 3.5 | 361 | 1147 | 74 | 1984/2/14 | 6.3 | 2.7  | 0    | 0.8 | 38.4  | 83 |
| 2002/2/15 | 12.3 | 3.1  | 0    | 2.0 | 796 | 1226 | 75 | 1984/2/15 | 7.9 | 2.2  | 0    | 0   | 70.8  | 87 |
| 2002/2/16 | 12.1 | 2.2  | 0    | 1.5 | 649 | 1443 | 86 | 1984/2/16 | 7.8 | 4.4  | 0.21 | 2.5 | 29.9  | 89 |
| 2002/2/17 | 17.2 | 8.8  | 0    | 3.8 | 715 | 1237 | 83 | 1984/2/17 | 6.3 | 0.9  | 0.09 | 3.3 | 13.7  | 85 |

|           |      |      |      |     |     |      |     |           |      |      |      |     |       |    |
|-----------|------|------|------|-----|-----|------|-----|-----------|------|------|------|-----|-------|----|
| 2002/2/18 | 10.4 | 4.9  | 0    | 4.0 | 710 | 1306 | 73  | 1984/2/18 | 4.8  | −3.1 | 0    | 1   | 193.3 | 77 |
| 2002/2/19 | 10.0 | 2.9  | 0    | 3.3 | 809 | 1217 | 65  | 1984/2/19 | 5.3  | −0.7 | 0    | 4   | 49.2  | 80 |
| 2002/2/20 | 13.1 | −1.3 | 0    | 2.5 | 938 | 1327 | 77  | 1984/2/20 | 7.3  | 2.7  | 0    | 2.8 | 53.4  | 78 |
| 2002/2/21 | 10.6 | 8.1  | 1.36 | 1.8 | 183 | 1211 | 96  | 1984/2/21 | 6.3  | 3.9  | 0.34 | 4.5 | 2.7   | 78 |
| 2002/2/22 | 13.6 | 6.9  | 0.14 | 3.0 | 847 | 1403 | 88  | 1984/2/22 | 5.6  | 3.6  | 1.02 | 3   | 0.9   | 95 |
| 2002/2/23 | 8.7  | 4.4  | 0.24 | 3.3 | 74  | 1335 | 89  | 1984/2/23 | 4.8  | 1.8  | 0.09 | 2.5 | 33.6  | 84 |
| 2002/2/24 | 11.8 | 2.0  | 0    | 2.3 | 738 | 1215 | 86  | 1984/2/24 | 5.5  | 1.9  | 0.05 | 2.8 | 46.3  | 81 |
| 2002/2/25 | 15.3 | 1.6  | 0    | 2.3 | 700 | 1143 | 86  | 1984/2/25 | 7.5  | 3.1  | 0.01 | 2.8 | 56    | 76 |
| 2002/2/26 | 10.3 | 8.3  | 0.01 | 2.3 | 562 | 1016 | 98  | 1984/2/26 | 8.5  | 0.7  | 0    | 2.5 | 163.1 | 60 |
| 2002/2/27 | 8.8  | 7.1  | 1.03 | 3.0 | 61  | 1233 | 100 | 1984/2/27 | 7.4  | 0    | 0    | 2.3 | 197.9 | 61 |
| 2002/2/28 | 10.7 | 7.1  | 0    | 2.5 | 309 | 1355 | 91  | 1984/2/28 | 5.6  | 0.5  | 0    | 2   | 111.5 | 61 |
| 2002/3/1  | 10.4 | 7.5  | 0.47 | 3.0 | 181 | 1237 | 90  | 1984/2/29 | 5.7  | −2.2 | 0    | 1.8 | 195.5 | 41 |
| 2002/3/2  | 8.5  | 5.9  | 2.26 | 4.3 | 12  | 1232 | 97  | 1984/3/1  | 11.5 | −0.1 | 0    | 3.8 | 133.7 | 49 |
| 2002/3/3  | 8.1  | 6.0  | 0.36 | 4.3 | 70  | 1206 | 92  | 1984/3/2  | 15.8 | 1.3  | 0    | 3.5 | 176.4 | 45 |
| 2002/3/4  | 7.8  | 5.8  | 1.3  | 3.8 | 149 | 1021 | 94  | 1984/3/3  | 9.5  | −1.4 | 0    | 2.3 | 197.5 | 53 |
| 2002/3/5  | 6.5  | 4.8  | 0.74 | 4.3 | 152 | 1312 | 95  | 1984/3/4  | 11   | −0.3 | 0    | 4   | 211.9 | 56 |
| 2002/3/6  | 13.7 | 3.8  | 0    | 3.0 | 787 | 1146 | 77  | 1984/3/5  | 17.3 | 2.2  | 0    | 3.5 | 147.2 | 59 |
| 2002/3/7  | 17.1 | 3.1  | 0    | 1.5 | 674 | 1150 | 78  | 1984/3/6  | 10.3 | 3.1  | 0    | 3.5 | 165.4 | 66 |
| 2002/3/8  | 18.7 | 5.3  | 0    | 1.8 | 662 | 1256 | 73  | 1984/3/7  | 7.7  | 2.7  | 0    | 3   | 41.2  | 68 |
| 2002/3/9  | 21.5 | 7.6  | 0    | 3.0 | 705 | 1231 | 80  | 1984/3/8  | 11.2 | 1.2  | 0    | 4   | 172   | 62 |
| 2002/3/10 | 21.4 | 9.3  | 0    | 2.5 | 674 | 1131 | 89  | 1984/3/9  | 12.3 | 4.3  | 0    | 1.8 | 145.9 | 77 |
| 2002/3/11 | 16.8 | 6.3  | 0    | 2.5 | 693 | 1203 | 87  | 1984/3/10 | 10   | 1.8  | 0    | 2   | 202.8 | 43 |
| 2002/3/12 | 17.1 | 10.3 | 1.2  | 1.8 | 868 | 1152 | 97  | 1984/3/11 | 15.6 | 4.5  | 0    | 3.3 | 173.6 | 56 |
| 2002/3/13 | 16.7 | 8.9  | 0.47 | 4.0 | 722 | 1000 | 95  | 1984/3/12 | 18.8 | 6    | 0    | 3   | 69.8  | 71 |
| 2002/3/14 | 15.8 | 13.3 | 0.71 | 3.3 | 559 | 938  | 95  | 1984/3/13 | 14.3 | 5.5  | 0.09 | 3.5 | 12.5  | 79 |
| 2002/3/15 | 21.1 | 10.8 | 0    | 2.8 | 804 | 1121 | 87  | 1984/3/14 | 9.1  | 4.7  | 0.18 | 2.3 | 25.2  | 91 |

|           |      |      |      |     |     |      |    |           |      |      |      |     |       |    |
|-----------|------|------|------|-----|-----|------|----|-----------|------|------|------|-----|-------|----|
| 2002/3/16 | 19.8 | 7.9  | 0    | 1.0 | 632 | 1058 | 83 | 1984/3/15 | 9.8  | 7.2  | 0.87 | 2.3 | 13    | 92 |
| 2002/3/17 | 22.8 | 12.0 | 0    | 3.5 | 736 | 1122 | 65 | 1984/3/16 | 12.7 | 8    | 0    | 3   | 117.1 | 79 |
| 2002/3/18 | 17.7 | 5.6  | 0    | 3.0 | 810 | 1158 | 51 | 1984/3/17 | 13.8 | 3.9  | 0    | 4.5 | 186   | 61 |
| 2002/3/19 | 23.0 | 10.8 | 0    | 3.3 | 790 | 1200 | 65 | 1984/3/18 | 11.4 | 7.5  | 0.66 | 2.8 | 13.1  | 85 |
| 2002/3/20 | 24.4 | 11.4 | 0    | 3.3 | 778 | 1145 | 75 | 1984/3/19 | 9.3  | 6.2  | 0.56 | 1.8 | 39    | 81 |
| 2002/3/21 | 20.0 | 10.0 | 1.11 | 3.3 | 917 | 1312 | 79 | 1984/3/20 | 14.7 | 3.3  | 0    | 4   | 165.2 | 63 |
| 2002/3/22 | 12.8 | 7.2  | 1.45 | 2.8 | 270 | 1008 | 90 | 1984/3/21 | 9.5  | 1.7  | 0    | 3.3 | 120.5 | 60 |
| 2002/3/23 | 16.2 | 4.8  | 0    | 2.0 | 662 | 1023 | 70 | 1984/3/22 | 11.7 | 3.1  | 0    | 3.8 | 233.4 | 62 |
| 2002/3/24 | 12.8 | 8.9  | 0.01 | 3.3 | 95  | 1036 | 82 | 1984/3/23 | 17.1 | 4    | 0    | 3   | 225.6 | 70 |
| 2002/3/25 | 12.0 | 8.6  | 0.04 | 2.8 | 229 | 1033 | 97 | 1984/3/24 | 15.2 | 8.2  | 0    | 3.3 | 140   | 68 |
| 2002/3/26 | 14.8 | 10.6 | 1.58 | 1.5 | 505 | 947  | 98 | 1984/3/25 | 13.3 | 7.6  | 0    | 3.5 | 89    | 65 |
| 2002/3/27 | 14.1 | 10.8 | 0.15 | 2.8 | 850 | 1345 | 91 | 1984/3/26 | 10.5 | 6.4  | 0    | 3.3 | 59.3  | 81 |
| 2002/3/28 | 14.1 | 9.1  | 0.02 | 1.8 | 147 | 1253 | 96 | 1984/3/27 | 10.8 | 8.3  | 0.44 | 3.3 | 25.7  | 80 |
| 2002/3/29 | 16.9 | 10.8 | 0.01 | 2.3 | 733 | 1349 | 90 | 1984/3/28 | 15.7 | 3.4  | 0.01 | 2   | 250.3 | 71 |
| 2002/3/30 | 23.0 | 9.8  | 0    | 3.8 | 779 | 1230 | 81 | 1984/3/29 | 20.6 | 8    | 0    | 3.8 | 250.8 | 74 |
| 2002/3/31 | 23.7 | 11.0 | 0    | 2.5 | 794 | 1250 | 66 | 1984/3/30 | 24.7 | 10.2 | 0    | 1.8 | 235.8 | 73 |
| 2002/4/1  | 25.5 | 12.1 | 0    | 2.8 | 729 | 1227 | 75 | 1984/3/31 | 19.6 | 9.3  | 0.25 | 3.5 | 72.7  | 76 |
| 2002/4/2  | 22.6 | 15.4 | 4.37 | 1.8 | 666 | 1452 | 97 | 1984/4/1  | 12.5 | 8.6  | 0.06 | 2.8 | 181.2 | 73 |
| 2002/4/3  | 22.7 | 12.4 | 0    | 2.0 | 925 | 1121 | 91 | 1984/4/2  | 14.8 | 9.4  | 0    | 4.5 | 99.2  | 80 |
| 2002/4/4  | 19.2 | 10.6 | 0    | 5.0 | 813 | 1108 | 92 | 1984/4/3  | 13.8 | 10.5 | 0.3  | 2.8 | 58.3  | 89 |
| 2002/4/5  | 25.6 | 15.7 | 0.05 | 6.3 | 728 | 1311 | 89 | 1984/4/4  | 13.1 | 9.8  | 0.24 | 1.5 | 34.5  | 95 |
| 2002/4/6  | 22.9 | 17.5 | 0.2  | 2.0 | 622 | 1411 | 92 | 1984/4/5  | 12.8 | 8.6  | 0.01 | 2.5 | 43.4  | 73 |
| 2002/4/7  | 21.9 | 12.7 | 0    | 2.8 | 855 | 1308 | 88 | 1984/4/6  | 12.7 | 6    | 0    | 3.8 | 256.9 | 62 |
| 2002/4/8  | 16.3 | 8.6  | 0.78 | 2.5 | 872 | 1323 | 71 | 1984/4/7  | 15.4 | 4.2  | 0    | 4.3 | 231.6 | 58 |
| 2002/4/9  | 17.2 | 9.2  | 0    | 2.0 | 939 | 1145 | 68 | 1984/4/8  | 11.9 | 8.2  | 0.63 | 4.5 | 14.5  | 82 |
| 2002/4/10 | 15.0 | 10.5 | 0.43 | 1.5 | 215 | 834  | 79 | 1984/4/9  | 10.5 | 9.3  | 0.11 | 3   | 21.2  | 91 |

|           |      |      |      |     |                  |                   |     |           |      |      |      |     |       |    |
|-----------|------|------|------|-----|------------------|-------------------|-----|-----------|------|------|------|-----|-------|----|
| 2002/4/11 | 16.6 | 9.9  | 0.04 | 2.3 | 707              | 1305              | 79  | 1984/4/10 | 12.9 | 8    | 0.06 | 2.5 | 109.8 | 83 |
| 2002/4/12 | 22.8 | 11.6 | 0    | 3.3 | 888              | 1154              | 73  | 1984/4/11 | 16.9 | 6.4  | 0    | 3.5 | 219.4 | 69 |
| 2002/4/13 | 26.3 | 11.1 | 0    | 3.0 | 912              | 1155              | 73  | 1984/4/12 | 13.4 | 9.7  | 0.19 | 2.3 | 60.4  | 55 |
| 2002/4/14 | 25.0 | 17.9 | 0    | 5.0 | 896              | 1137              | 59  | 1984/4/13 | 19   | 7.3  | 0    | 2   | 249.2 | 70 |
| 2002/4/15 | 26.3 | 19.7 | 0.01 | 3.3 | 676              | 1159              | 83  | 1984/4/14 | 21.6 | 8.5  | 0    | 3.8 | 247.6 | 73 |
| 2002/4/16 | 24.1 | 16.2 | 0.48 | 4.3 | 532              | 931               | 85  | 1984/4/15 | 26.3 | 10.8 | 0    | 2.5 | 255.8 | 70 |
| 2002/4/17 | 17.4 | 11.9 | 0.28 | 2.8 | 853              | 927               | 77  | 1984/4/16 | 28.7 | 13.6 | 0    | 3.5 | 257.9 | 73 |
| 2002/4/18 | 15.7 | 11.2 | 0    | 2.0 | 411              | 1350              | 75  | 1984/4/17 | 23.3 | 14.3 | 0.5  | 4.3 | 21.2  | 91 |
| 2002/4/19 | 16.6 | 9.1  | 0.36 | 2.8 | 459              | 918               | 93  | 1984/4/18 | 14.6 | 10.6 | 0.99 | 4   | 22.3  | 79 |
| 2002/4/20 | 15.7 | 14.0 | 1.23 | 2.0 | 630 <sup>@</sup> | 1200 <sup>@</sup> | 100 | 1984/4/19 | 17.5 | 6.8  | 0    | 2.8 | 272   | 79 |
| 2002/4/21 | 20.8 | 15.0 | 0.03 | 2.3 | 801              | 1357              | 97  | 1984/4/20 | 13.3 | 9.3  | 1.93 | 4.8 | 21.1  | 92 |
| 2002/4/22 | 23.3 | 16.2 | 0.09 | 3.0 | 305              | 1634              | 99  | 1984/4/21 | 14.2 | 11   | 0.09 | 2.8 | 87.8  | 88 |
| 2002/4/23 | 19.9 | 12.8 | 0    | 3.5 | 464              | 1124              | 98  | 1984/4/22 | 19.4 | 6    | 0    | 0.8 | 208   | 79 |
| 2002/4/24 | 14.2 | 10.6 | 0.04 | 4.0 | 185              | 1251              | 75  | 1984/4/23 | 20.9 | 9.4  | 0    | 2.3 | 189.5 | 71 |
| 2002/4/25 | 13.2 | 9.6  | 0    | 2.8 | 338              | 1149              | 75  | 1984/4/24 | 21.7 | 11   | 0.02 | 3.8 | 75    | 60 |
| 2002/4/26 | 18.4 | 8.4  | 0    | 3.5 | 1180             | 1258              | 77  | 1984/4/25 | 22   | 12.5 | 0.03 | 2.5 | 168.6 | 79 |
| 2002/4/27 | 19.5 | 12.6 | 0.01 | 3.3 | 1165             | 1218              | 84  | 1984/4/26 | 24.7 | 13.9 | 0    | 3   | 228.2 | 81 |
| 2002/4/28 | 19.3 | 12.7 | 0    | 2.8 | 893              | 1005              | 95  | 1984/4/27 | 20.3 | 15.1 | 0    | 4   | 49.3  | 92 |
| 2002/4/29 | 28.5 | 15.6 | 0    | 3.3 | 843              | 1212              | 86  | 1984/4/28 | 19   | 14.3 | 0.06 | 2   | 77.7  | 94 |
| 2002/4/30 | 24.2 | 15.4 | 1.96 | 3.3 | 272              | 1337              | 98  | 1984/4/29 | 20.5 | 14.6 | 0    | 3.3 | 144.3 | 85 |
| 2002/5/1  | 20.4 | 13.7 | 0.02 | 1.3 | 781              | 1041              | 91  | 1984/4/30 | 22.2 | 14.6 | 0    | 3.8 | 219.3 | 84 |
| 2002/5/2  | 23.3 | 14.5 | 0.06 | 2.8 | 938              | 1418              | 93  | 1984/5/1  | 20.1 | 13.5 | 0    | 5.3 | 196.4 | 62 |
| 2002/5/3  | 20.4 | 17.3 | 0.02 | 2.0 | 869              | 1212              | 96  | 1984/5/2  | 19.5 | 10.3 | 0    | 3.8 | 173.8 | 70 |
| 2002/5/4  | 17.3 | 15.1 | 0.08 | 3.0 | 687              | 1133              | 98  | 1984/5/3  | 15.7 | 11.5 | 0.82 | 4.3 | 7.1   | 88 |
| 2002/5/5  | 16.8 | 14.8 | 3.55 | 3.3 | 275              | 1100              | 100 | 1984/5/4  | 13.7 | 11.5 | 1.77 | 3.5 | 12.3  | 92 |
| 2002/5/6  | 24.2 | 16.5 | 3.03 | 2.5 | 1176             | 1121              | 100 | 1984/5/5  | 16   | 11   | 1.53 | 3.3 | 25.8  | 87 |

|           |      |      |      |     |                  |                   |     |           |      |      |      |     |       |    |
|-----------|------|------|------|-----|------------------|-------------------|-----|-----------|------|------|------|-----|-------|----|
| 2002/5/7  | 18.4 | 13.5 | 0.09 | 4.3 | 771              | 1234              | 92  | 1984/5/6  | 22.8 | 9.3  | 0    | 1.3 | 275.1 | 77 |
| 2002/5/8  | 20.5 | 11.9 | 0.01 | 1.3 | 1092             | 1202              | 88  | 1984/5/7  | 24.9 | 12.4 | 0    | 2.8 | 262.7 | 72 |
| 2002/5/9  | 16.3 | 14.0 | 1.86 | 2.3 | 135              | 1603              | 100 | 1984/5/8  | 27.8 | 13.2 | 0    | 2.5 | 248.8 | 71 |
| 2002/5/10 | 20.8 | 14.9 | 0.08 | 2.5 | 968              | 1259              | 95  | 1984/5/9  | 30.2 | 14.7 | 0    | 1.8 | 282.4 | 71 |
| 2002/5/11 | 22.4 | 14.8 | 0    | 3.0 | 987              | 1206              | 88  | 1984/5/10 | 30.2 | 17.3 | 0    | 3.5 | 294.6 | 66 |
| 2002/5/12 | 23.5 | 14.1 | 0    | 2.5 | 1130             | 1312              | 88  | 1984/5/11 | 30.7 | 18.1 | 0    | 3.8 | 259.4 | 79 |
| 2002/5/13 | 21.0 | 15.9 | 0.02 | 4.3 | 418              | 953               | 93  | 1984/5/12 | 30.6 | 21.7 | 1.97 | 3.5 | 123   | 89 |
| 2002/5/14 | 21.8 | 18.5 | 3.5  | 3.8 | 31               | 1637              | 100 | 1984/5/13 | 22.6 | 15.4 | 0.5  | 2.8 | 80.6  | 84 |
| 2002/5/15 | 21.3 | 17.9 | 0.42 | 4.8 | 1146             | 1249              | 89  | 1984/5/14 | 22.9 | 13.4 | 0    | 2.8 | 234.5 | 83 |
| 2002/5/16 | 22.2 | 16.1 | 0    | 4.5 | 1172             | 1240              | 82  | 1984/5/15 | 19.8 | 15.3 | 0.34 | 3.3 | 53.2  | 88 |
| 2002/5/17 | 22.8 | 15.8 | 0    | 2.5 | 511              | 1529              | 86  | 1984/5/16 | 22.8 | 14.3 | 0.36 | 2.3 | 290.4 | 68 |
| 2002/5/18 | 20.5 | 15.3 | 0    | 2.8 | 910              | 1401              | 85  | 1984/5/17 | 23.4 | 15.7 | 0    | 2.3 | 285.8 | 61 |
| 2002/5/19 | 24.8 | 14.7 | 0    | 1.5 | 1211             | 1231              | 82  | 1984/5/18 | 24.2 | 13.9 | 0    | 2.5 | 303.1 | 67 |
| 2002/5/20 | 26.5 | 14.9 | 0    | 2.0 | 1209             | 1156              | 73  | 1984/5/19 | 24.8 | 14.6 | 0    | 3.8 | 281.2 | 65 |
| 2002/5/21 | 21.0 | 15.1 | 2.91 | 4.3 | 790 <sup>@</sup> | 1200 <sup>@</sup> | 94  | 1984/5/20 | 24.3 | 15.2 | 0    | 4.5 | 142.2 | 71 |
| 2002/5/22 | 17.0 | 15.5 | 2.69 | 3.3 | 372              | 1146              | 99  | 1984/5/21 | 20.4 | 15.7 | 0.45 | 4   | 213.8 | 74 |
| 2002/5/23 | 26.1 | 15.2 | 0.04 | 2.3 | 1048             | 1246              | 83  | 1984/5/22 | 21.5 | 15.4 | 0.09 | 4   | 99.8  | 81 |
| 2002/5/24 | 27.7 | 17.8 | 0    | 2.5 | 904              | 1155              | 71  | 1984/5/23 | 23.8 | 16.2 | 0    | 4.3 | 121.9 | 73 |
| 2002/5/25 | 30.0 | 15.3 | 0    | 2.0 | 985              | 1157              | 60  | 1984/5/24 | 21.3 | 17.2 | 0.46 | 4.8 | 0.9   | 95 |
| 2002/5/26 | 30.0 | 17.8 | 0    | 2.5 | 897              | 1136              | 67  | 1984/5/25 | 23   | 18.4 | 1.19 | 2.3 | 163.5 | 89 |
| 2002/5/27 | 29.0 | 17.2 | 0    | 2.5 | 860              | 1108              | 66  | 1984/5/26 | 23.1 | 17.3 | 0    | 0.8 | 82.6  | 85 |
| 2002/5/28 | 28.0 | 18.6 | 0    | 2.5 | 744              | 1314              | 76  | 1984/5/27 | 26.7 | 18.7 | 0    | 1.5 | 217.4 | 82 |
| 2002/5/29 | 26.6 | 19.8 | 0.17 | 3.0 | 215              | 1123              | 89  | 1984/5/28 | 29.4 | 19.6 | 0    | 1.3 | 240.5 | 83 |
| 2002/5/30 | 23.5 | 18.7 | 5.18 | 2.3 | 535              | 1254              | 95  | 1984/5/29 | 29.8 | 20.4 | 0    | 1.8 | 184.4 | 72 |
| 2002/5/31 | 28.2 | 18.1 | 0    | 2.3 | 846              | 1156              | 92  | 1984/5/30 | 26.5 | 20.9 | 0    | 2.8 | 152.3 | 87 |
| 2002/6/1  | 31.0 | 20.7 | 0    | 2.5 | 851              | 1245              | 81  | 1984/5/31 | 25.4 | 18   | 0    | 4   | 144.1 | 81 |

|                  |             |             |             |            |             |             |           |                  |             |             |          |            |              |           |
|------------------|-------------|-------------|-------------|------------|-------------|-------------|-----------|------------------|-------------|-------------|----------|------------|--------------|-----------|
| 2002/6/2         | 32.0        | 18.8        | 0           | 2.5        | 978         | 1241        | 69        | 1984/6/1         | 22.2        | 18.8        | 0.3      | 3          | 16.1         | 88        |
| 2002/6/3         | 32.3        | 19.1        | 0           | 2.5        | 929         | 1222        | 72        | 1984/6/2         | 21          | 18.3        | 0.7      | 1.5        | 115          | 89        |
| 2002/6/4         | 30.9        | 21.6        | 0           | 3.8        | 1050        | 1230        | 79        | 1984/6/3         | 27.2        | 18.4        | 0.09     | 2          | 269.7        | 77        |
| 2002/6/5         | 30.6        | 20.6        | 0           | 3.3        | 896         | 1207        | 76        | 1984/6/4         | 31          | 19.2        | 0        | 3.8        | 255.7        | 81        |
| 2002/6/6         | 30.5        | 20.2        | 0           | 4.3        | 962         | 1129        | 82        | 1984/6/5         | 34.3        | 21.7        | 0        | 3.5        | 274.1        | 71        |
| 2002/6/7         | 30.2        | 22.0        | 0           | 4.8        | 1077        | 1228        | 84        | 1984/6/6         | 34.4        | 22.5        | 1.57     | 3.5        | 210          | 80        |
| 2002/6/8         | 30.6        | 23.2        | 0           | 4.8        | 1251        | 1110        | 82        | 1984/6/7         | 23.9        | 19.2        | 4.56     | 3.3        | 105.3        | 91        |
| 2002/6/9         | 29.6        | 22.5        | 0           | 5.3        | 1247        | 1307        | 85        | 1984/6/8         | 23          | 20.9        | 2.52     | 3.3        | 21.3         | 96        |
| 2002/6/10        | 31.6        | 24.0        | 0.12        | 3.5        | 953         | 1206        | 84        | 1984/6/9         | 25.7        | 21.8        | 1.09     | 2.8        | 100.7        | 85        |
| 2002/6/11        | 33.4        | 24.2        | 0           | 2.8        | 765         | 1316        | 74        | 1984/6/10        | 27          | 18.8        | 0        | 1.5        | 262.5        | 79        |
| 2002/6/12        | 34.6        | 25.1        | 0           | 3.8        | 963         | 1359        | 66        | 1984/6/11        | 28.3        | 19.2        | 0        | 4.5        | 271.5        | 71        |
| 2002/6/13        | 28.2        | 21.2        | 0.3         | 2.0        | 963         | 1154        | 72        | 1984/6/12        | 28.7        | 20.2        | 0        | 3.8        | 166.2        | 83        |
| 2002/6/14        | 31.5        | 19.2        | 0           | 3.0        | 1046        | 1051        | 65        | 1984/6/13        | 24          | 20.3        | 4.03     | 4          | 2.5          | 88        |
| 2002/6/15        | 30.2        | 21.6        | 0           | 3.5        | 1025        | 1213        | 78        | 1984/6/14        | 24.7        | 19.7        | 2        | 4.5        | 33.3         | 89        |
| 2002/6/16        | 30.0        | 21.5        | 0           | 3.0        | 1091        | 1226        | 83        | 1984/6/15        | 24.3        | 20.8        | 0.12     | 2.8        | 30.7         | 92        |
| 2002/6/17        | 32.0        | 21.8        | 0           | 2.3        | 899         | 1225        | 77        | 1984/6/16        | 29.9        | 21.7        | 0        | 3.5        | 223.7        | 81        |
| 2002/6/18        | 33.3        | 22.8        | 0           | 3.3        | 948         | 1311        | 73        | 1984/6/17        | 31.9        | 22.1        | 0        | 3          | 140.2        | 74        |
| 2002/6/19        | 27.3        | 23.0        | 1.44        | 2.0        | 317         | 1224        | 97        | 1984/6/18        | 27.4        | 23.8        | 1.51     | 3          | 110.4        | 87        |
| 2002/6/20        | 26.8        | 25.2        | 2.57        | 1.8        | 406         | 1237        | 99        | 1984/6/19        | 31.2        | 23          | 0        | 2.5        | 207.5        | 82        |
| 2002/6/21        | 25.7        | 23.6        | 0.86        | 3.3        | 228         | 1317        | 98        | <b>1984/6/20</b> | <b>27.3</b> | <b>22.3</b> | <b>0</b> | <b>1.0</b> | <b>55.8</b>  | <b>82</b> |
| <b>2002/6/22</b> | <b>27.8</b> | <b>22.9</b> | <b>0</b>    | <b>3.3</b> | <b>634</b>  | <b>1108</b> | <b>91</b> | <b>1984/6/21</b> | <b>30.4</b> | <b>21.5</b> | <b>0</b> | <b>1.0</b> | <b>55.8</b>  | <b>92</b> |
| <b>2002/6/23</b> | <b>31.2</b> | <b>25.0</b> | <b>0.06</b> | <b>5.3</b> | <b>948</b>  | <b>1100</b> | <b>92</b> | <b>1984/6/22</b> | <b>31.3</b> | <b>24.2</b> | <b>0</b> | <b>1.0</b> | <b>55.8</b>  | <b>94</b> |
| <b>2002/6/24</b> | <b>27.5</b> | <b>21.5</b> | <b>4.52</b> | <b>3.5</b> | <b>871</b>  | <b>1432</b> | <b>92</b> | <b>1984/6/23</b> | <b>25</b>   | <b>20.8</b> | <b>0</b> | <b>1.0</b> | <b>55.8</b>  | <b>86</b> |
| <b>2002/6/25</b> | <b>25.4</b> | <b>19.9</b> | <b>0</b>    | <b>2.5</b> | <b>1339</b> | <b>1141</b> | <b>86</b> | <b>1984/6/24</b> | <b>25.9</b> | <b>20.6</b> | <b>0</b> | <b>1.0</b> | <b>138.5</b> | <b>84</b> |
| <b>2002/6/26</b> | <b>26.6</b> | <b>20.3</b> | <b>0</b>    | <b>2.3</b> | <b>927</b>  | <b>1004</b> | <b>84</b> | <b>1984/6/25</b> | <b>28.8</b> | <b>23.2</b> | <b>0</b> | <b>1.0</b> | <b>138.5</b> | <b>85</b> |
| <b>2002/6/27</b> | <b>25.3</b> | <b>21.4</b> | <b>0</b>    | <b>3.3</b> | <b>495</b>  | <b>1122</b> | <b>93</b> | <b>1984/6/26</b> | <b>31.2</b> | <b>22</b>   | <b>0</b> | <b>1.0</b> | <b>138.5</b> | <b>77</b> |

|                  |             |             |             |            |             |             |           |           |      |      |      |     |       |    |
|------------------|-------------|-------------|-------------|------------|-------------|-------------|-----------|-----------|------|------|------|-----|-------|----|
| <b>2002/6/28</b> | <b>23.4</b> | <b>20.7</b> | <b>1.77</b> | <b>4.5</b> | <b>121</b>  | <b>1314</b> | <b>97</b> | 1984/6/27 | 30.7 | 24   | 0.15 | 1.5 | 170.3 | 80 |
| <b>2002/6/29</b> | <b>23.7</b> | <b>20.6</b> | <b>0</b>    | <b>2.3</b> | <b>465</b>  | <b>1122</b> | <b>98</b> | 1984/6/28 | 26.2 | 22.3 | 0.87 | 3.5 | 35.8  | 88 |
| 2002/6/30        | 28.6        | 21.4        | 0.03        | 2.5        | 1118        | 1046        | 92        | 1984/6/29 | 25.1 | 21.8 | 1.87 | 3   | 50.7  | 90 |
| 2002/7/1         | 25.5        | 22.1        | 0           | 2.3        | 278         | 1110        | 96        | 1984/6/30 | 28.9 | 23.8 | 0.34 | 1.8 | 179.6 | 87 |
| 2002/7/2         | 28.7        | 21.1        | 0           | 2.5        | 1127        | 1120        | 91        | 1984/7/1  | 33.5 | 24.2 | 0    | 1.8 | 279.7 | 82 |
| 2002/7/3         | 30.7        | 22.5        | 0           | 3.3        | 1161        | 1127        | 92        | 1984/7/2  | 34.4 | 26   | 0    | 2.8 | 247.2 | 80 |
| 2002/7/4         | 26.2        | 23.5        | 1.99        | 5.5        | 367         | 948         | 96        | 1984/7/3  | 33.2 | 26.6 | 0    | 3   | 107.1 | 90 |
| 2002/7/5         | 25.1        | 22.9        | 1.93        | 6.0        | 422         | 1642        | 96        | 1984/7/4  | 29   | 23.3 | 2.32 | 3.5 | 37.4  | 87 |
| 2002/7/6         | 31.7        | 23.5        | 0           | 2.8        | 1007        | 1109        | 82        | 1984/7/5  | 24.4 | 21.6 | 1.05 | 2   | 24.5  | 86 |
| 2002/7/7         | 29.5        | 24.4        | 0.09        | 1.3        | 589         | 1417        | 77        | 1984/7/6  | 31.8 | 24   | 1.79 | 2   | 33.1  | 95 |
| 2002/7/8         | 30.1        | 20.8        | 0           | 1.3        | 771         | 938         | 75        | 1984/7/7  | 33.5 | 24.5 | 0    | 2   | 208.1 | 86 |
| 2002/7/9         | 27.0        | 21.9        | 0           | 2.5        | 205         | 1048        | 91        | 1984/7/8  | 33.8 | 27.2 | 0    | 1.8 | 196.1 | 86 |
| 2002/7/10        | 30.0        | 22.5        | 0           | 2.0        | 1193        | 1133        | 85        | 1984/7/9  | 34.7 | 27.3 | 0    | 2.3 | 159.8 | 88 |
| 2002/7/11        | 32.2        | 23.6        | 0           | 1.8        | 917         | 1201        | 82        | 1984/7/10 | 34.6 | 27.3 | 0    | 1.8 | 232.1 | 88 |
| 2002/7/12        | 32.7        | 24.0        | 0           | 3.0        | 803         | 1158        | 76        | 1984/7/11 | 34.3 | 27.6 | 0    | 1.8 | 220.7 | 85 |
| 2002/7/13        | 33.0        | 21.8        | 0           | 2.5        | 905         | 1121        | 83        | 1984/7/12 | 34.7 | 27.3 | 0    | 3.8 | 236.8 | 76 |
| 2002/7/14        | 36.7        | 25.1        | 0           | 2.0        | 805         | 1211        | 80        | 1984/7/13 | 34.8 | 27.1 | 0    | 2.8 | 265   | 73 |
| 2002/7/15        | 36.6        | 28.5        | 0           | 1.8        | 1129        | 1301        | 80        | 1984/7/14 | 34.3 | 26.3 | 0.04 | 3.8 | 273.8 | 69 |
| 2002/7/16        | 35.5        | 29.2        | 0           | 3.0        | 881         | 1119        | 80        | 1984/7/15 | 34.9 | 26.7 | 0    | 3   | 270.4 | 70 |
| 2002/7/17        | 32.7        | 25.8        | 0.05        | 1.8        | 767         | 1111        | 86        | 1984/7/16 | 34.9 | 26.3 | 0    | 1.8 | 242.4 | 78 |
| 2002/7/18        | 29.1        | 23.1        | 7.96        | 2.5        | 240         | 1018        | 93        | 1984/7/17 | 31.5 | 24.3 | 0    | 3.8 | 281.6 | 81 |
| 2002/7/19        | 30.8        | 23.0        | 0           | 1.8        | 834         | 1125        | 90        | 1984/7/18 | 30.5 | 23.5 | 0    | 4   | 156   | 78 |
| <b>2002/7/20</b> | <b>30.5</b> | <b>26.2</b> | <b>0</b>    | <b>1.8</b> | <b>372</b>  | <b>850</b>  | <b>94</b> | 1984/7/19 | 29.6 | 23.2 | 0    | 4.5 | 94.4  | 80 |
| <b>2002/7/21</b> | <b>30.8</b> | <b>26.0</b> | <b>0</b>    | <b>4.0</b> | <b>733</b>  | <b>1559</b> | <b>88</b> | 1984/7/20 | 31.7 | 25   | 0.64 | 3.8 | 87.5  | 90 |
| <b>2002/7/22</b> | <b>29.4</b> | <b>24.5</b> | <b>0</b>    | <b>2.5</b> | <b>1046</b> | <b>1442</b> | <b>94</b> | 1984/7/21 | 28   | 23.9 | 2.82 | 2.5 | 87.6  | 91 |
| <b>2002/7/23</b> | <b>35.0</b> | <b>26.5</b> | <b>0.06</b> | <b>3.0</b> | <b>936</b>  | <b>1143</b> | <b>88</b> | 1984/7/22 | 29.8 | 22.9 | 0    | 2.8 | 251   | 84 |

|                  |             |             |             |            |             |             |           |           |      |      |      |     |       |    |
|------------------|-------------|-------------|-------------|------------|-------------|-------------|-----------|-----------|------|------|------|-----|-------|----|
| <b>2002/7/24</b> | <b>34.1</b> | <b>25.2</b> | <b>0</b>    | <b>3.5</b> | <b>927</b>  | <b>1154</b> | <b>83</b> | 1984/7/23 | 31.5 | 23.3 | 0    | 1   | 159.5 | 81 |
| <b>2002/7/25</b> | <b>32.7</b> | <b>25.7</b> | <b>0.48</b> | <b>1.5</b> | <b>834</b>  | <b>1112</b> | <b>86</b> | 1984/7/24 | 31.7 | 24.5 | 0    | 2.8 | 145.1 | 87 |
| <b>2002/7/26</b> | <b>30.0</b> | <b>25.6</b> | <b>0</b>    | <b>2.5</b> | <b>1059</b> | <b>1210</b> | <b>89</b> | 1984/7/25 | 32.2 | 26.4 | 0    | 2.3 | 84.7  | 94 |
| <b>2002/7/27</b> | <b>32.6</b> | <b>24.8</b> | <b>0</b>    | <b>2.8</b> | <b>900</b>  | <b>1145</b> | <b>82</b> | 1984/7/26 | 35.5 | 28.1 | 0    | 3.3 | 249.7 | 82 |
| <b>2002/7/28</b> | <b>34.3</b> | <b>26.6</b> | <b>0</b>    | <b>1.8</b> | <b>888</b>  | <b>1335</b> | <b>88</b> | 1984/7/27 | 35.5 | 27.7 | 0    | 2   | 133.6 | 90 |
| <b>2002/7/29</b> | <b>34.8</b> | <b>26.8</b> | <b>0</b>    | <b>2.3</b> | <b>887</b>  | <b>1205</b> | <b>81</b> | 1984/7/28 | 31.2 | 24   | 3.07 | 1.5 | 115.5 | 92 |
| 2002/7/30        | 34.0        | 26.4        | 0           | 3.3        | 939         | 1206        | 79        | 1984/7/29 | 32.7 | 25.7 | 0    | 2.3 | 142.5 | 90 |
| 2002/7/31        | 33.8        | 26.2        | 0           | 4.5        | 1074        | 1116        | 83        | 1984/7/30 | 31.6 | 25   | 0    | 3   | 236.2 | 87 |
| 2002/8/1         | 32.4        | 26.8        | 0           | 3.5        | 1148        | 1249        | 87        | 1984/7/31 | 29.4 | 24   | 0.69 | 5.5 | 163.2 | 88 |
| 2002/8/2         | 33.6        | 26.7        | 0           | 3.3        | 1142        | 1210        | 84        | 1984/8/1  | 29.7 | 24.4 | 1.64 | 5.3 | 77.8  | 92 |
| 2002/8/3         | 34.0        | 26.6        | 0           | 4.3        | 1147        | 1225        | 83        | 1984/8/2  | 32.6 | 24.6 | 0    | 2   | 196.1 | 86 |
| 2002/8/4         | 33.6        | 27.0        | 0           | 5.0        | 1127        | 1123        | 80        | 1984/8/3  | 33.2 | 26.8 | 0    | 3.8 | 244.9 | 91 |
| 2002/8/5         | 33.2        | 26.2        | 0           | 4.0        | 1215        | 1212        | 81        | 1984/8/4  | 34.3 | 26.6 | 0    | 3   | 238.9 | 80 |
| 2002/8/6         | 32.2        | 27.7        | 0           | 4.5        | 1244        | 1147        | 80        | 1984/8/5  | 34.7 | 27.1 | 0    | 2.8 | 191.3 | 85 |
| 2002/8/7         | 28.6        | 25.3        | 0.57        | 3.0        | 343         | 1145        | 93        | 1984/8/6  | 33   | 25.6 | 0    | 4.3 | 275.3 | 86 |
| 2002/8/8         | 29.1        | 24.4        | 0.19        | 2.8        | 1005        | 1405        | 86        | 1984/8/7  | 32.7 | 25.6 | 0    | 4.3 | 249.4 | 88 |
| 2002/8/9         | 25.7        | 21.7        | 0.59        | 1.0        | 434         | 1306        | 90        | 1984/8/8  | 31.1 | 26.5 | 0.03 | 5.8 | 79.4  | 90 |
| 2002/8/10        | 28.1        | 20.4        | 1.17        | 1.5        | 945         | 1335        | 83        | 1984/8/9  | 33.1 | 26.8 | 0    | 6.5 | 218.9 | 83 |
| 2002/8/11        | 27.4        | 22.2        | 0.16        | 1.0        | 245         | 1414        | 83        | 1984/8/10 | 32.9 | 26.1 | 0    | 6.5 | 264.9 | 80 |
| 2002/8/12        | 27.8        | 21.5        | 0.1         | 1.5        | 708         | 1402        | 83        | 1984/8/11 | 33.1 | 25.9 | 0    | 4   | 276.4 | 84 |
| 2002/8/13        | 28.0        | 22.7        | 0.11        | 2.0        | 635         | 1130        | 90        | 1984/8/12 | 33.2 | 25.2 | 0    | 4.5 | 256.8 | 83 |
| 2002/8/14        | 27.6        | 22.9        | 0.1         | 3.0        | 869         | 1245        | 95        | 1984/8/13 | 33.2 | 25.6 | 0    | 3.8 | 210.5 | 85 |
| 2002/8/15        | 24.9        | 21.8        | 1.31        | 2.8        | 209         | 1438        | 96        | 1984/8/14 | 31.9 | 23.5 | 0.81 | 2.5 | 96.2  | 89 |
| 2002/8/16        | 23.7        | 22.0        | 2.2         | 3.8        | 1080        | 1136        | 99        | 1984/8/15 | 27.8 | 22.5 | 4.54 | 4.5 | 196.3 | 76 |
| 2002/8/17        | 28.1        | 23.2        | 3.62        | 1.3        | 1007        | 1200        | 97        | 1984/8/16 | 27.8 | 18.9 | 0    | 3.5 | 258.9 | 77 |
| 2002/8/18        | 31.0        | 24.1        | 0           | 1.5        | 829         | 1232        | 86        | 1984/8/17 | 25.7 | 20.6 | 0.67 | 3.3 | 58.1  | 92 |

|                  |             |             |             |            |             |             |           |           |      |      |      |     |       |    |
|------------------|-------------|-------------|-------------|------------|-------------|-------------|-----------|-----------|------|------|------|-----|-------|----|
| 2002/8/19        | 32.0        | 23.4        | 0           | 1.3        | 856         | 1142        | 85        | 1984/8/18 | 31   | 24.1 | 0    | 4.3 | 94.4  | 91 |
| <b>2002/8/20</b> | <b>30.7</b> | <b>23.8</b> | <b>0</b>    | <b>2.0</b> | <b>916</b>  | <b>1220</b> | <b>86</b> | 1984/8/19 | 30   | 24.3 | 0    | 4.8 | 230.9 | 87 |
| <b>2002/8/21</b> | <b>31.8</b> | <b>23.6</b> | <b>0</b>    | <b>1.5</b> | <b>874</b>  | <b>1214</b> | <b>85</b> | 1984/8/20 | 27.3 | 24.1 | 1.12 | 3.8 | 83.6  | 92 |
| <b>2002/8/22</b> | <b>34.3</b> | <b>24.5</b> | <b>0</b>    | <b>2.3</b> | <b>872</b>  | <b>1200</b> | <b>83</b> | 1984/8/21 | 31.4 | 22.9 | 0    | 2.8 | 218.4 | 89 |
| <b>2002/8/23</b> | <b>36.1</b> | <b>27.6</b> | <b>0</b>    | <b>2.3</b> | <b>834</b>  | <b>1201</b> | <b>81</b> | 1984/8/22 | 32.9 | 24.8 | 0    | 2.5 | 226   | 81 |
| <b>2002/8/24</b> | <b>33.5</b> | <b>25.5</b> | <b>0.23</b> | <b>1.5</b> | <b>858</b>  | <b>1223</b> | <b>81</b> | 1984/8/23 | 31.9 | 25.1 | 0.36 | 2.8 | 131.9 | 85 |
| <b>2002/8/25</b> | <b>31.7</b> | <b>24.5</b> | <b>0.19</b> | <b>1.8</b> | <b>995</b>  | <b>1052</b> | <b>84</b> | 1984/8/24 | 32.5 | 25.2 | 0    | 2   | 178.7 | 86 |
| <b>2002/8/26</b> | <b>30.2</b> | <b>23.2</b> | <b>1.8</b>  | <b>2.5</b> | <b>953</b>  | <b>1227</b> | <b>94</b> | 1984/8/25 | 30.6 | 24.4 | 0    | 3.5 | 87.4  | 86 |
| <b>2002/8/27</b> | <b>30.2</b> | <b>23.9</b> | <b>0.58</b> | <b>1.8</b> | <b>792</b>  | <b>1319</b> | <b>91</b> | 1984/8/26 | 30.7 | 24.4 | 0    | 3   | 191   | 92 |
| <b>2002/8/28</b> | <b>30.3</b> | <b>23.7</b> | <b>0</b>    | <b>2.5</b> | <b>821</b>  | <b>1117</b> | <b>87</b> | 1984/8/27 | 31.3 | 23.4 | 0    | 2.3 | 193.5 | 88 |
| <b>2002/8/29</b> | <b>30.5</b> | <b>24.9</b> | <b>0</b>    | <b>2.0</b> | <b>957</b>  | <b>1202</b> | <b>89</b> | 1984/8/28 | 32.8 | 25.1 | 0    | 1   | 234.8 | 84 |
| <b>2002/8/30</b> | <b>29.8</b> | <b>24.9</b> | <b>0.27</b> | <b>4.3</b> | <b>1080</b> | <b>1128</b> | <b>85</b> | 1984/8/29 | 31.7 | 24.9 | 0    | 3.3 | 149.4 | 86 |
| <b>2002/8/31</b> | <b>31.9</b> | <b>24.3</b> | <b>0</b>    | <b>4.0</b> | <b>956</b>  | <b>1112</b> | <b>82</b> | 1984/8/30 | 31.7 | 24.7 | 2.04 | 4.3 | 161.1 | 91 |
| 2002/9/1         | 34.1        | 23.1        | 0           | 2.5        | 915         | 1147        | 75        | 1984/8/31 | 30.8 | 24.6 | 1.1  | 3   | 50    | 96 |
| 2002/9/2         | 34.7        | 25.1        | 0           | 2.0        | 758         | 1114        | 70        | 1984/9/1  | 30.2 | 22   | 4.26 | 2.8 | 0.6   | 97 |
| 2002/9/3         | 35.1        | 23.5        | 0           | 1.5        | 805         | 1224        | 70        | 1984/9/2  | 22.7 | 20.2 | 6.52 | 3.3 | 0     | 94 |
| 2002/9/4         | 32.3        | 24.0        | 0           | 2.5        | 779         | 1207        | 82        | 1984/9/3  | 26   | 20   | 0.52 | 1.8 | 253.6 | 73 |
| 2002/9/5         | 30.4        | 24.8        | 0           | 4.5        | 953         | 1126        | 79        | 1984/9/4  | 28.3 | 17.6 | 0    | 1.5 | 214.7 | 78 |
| 2002/9/6         | 27.9        | 21.5        | 0           | 4.3        | 859         | 1002        | 73        | 1984/9/5  | 28.7 | 20.7 | 0    | 2.3 | 184.6 | 81 |
| 2002/9/7         | 28.8        | 22.2        | 0.03        | 5.0        | 1018        | 1013        | 85        | 1984/9/6  | 30.6 | 22.4 | 2.31 | 2.3 | 63.1  | 94 |
| 2002/9/8         | 31.3        | 25.0        | 0           | 5.5        | 1000        | 1135        | 87        | 1984/9/7  | 28.1 | 21.7 | 3.29 | 1.8 | 106.6 | 94 |
| 2002/9/9         | 33.7        | 25.8        | 0.5         | 2.8        | 930         | 1152        | 88        | 1984/9/8  | 32.2 | 23.5 | 0    | 2.5 | 199   | 90 |
| 2002/9/10        | 31.3        | 24.7        | 0           | 2.8        | 878         | 1158        | 88        | 1984/9/9  | 27.3 | 20.7 | 1.42 | 2.8 | 10.8  | 94 |
| 2002/9/11        | 29.8        | 21.8        | 0           | 2.8        | 639         | 1138        | 81        | 1984/9/10 | 21.3 | 16.4 | 2.98 | 3.3 | 2.3   | 91 |
| 2002/9/12        | 29.4        | 21.6        | 0           | 2.8        | 857         | 1316        | 79        | 1984/9/11 | 19.7 | 17   | 0.46 | 1.5 | 12    | 78 |
| 2002/9/13        | 27.7        | 23.0        | 0.1         | 2.8        | 957         | 1044        | 81        | 1984/9/12 | 20.9 | 16.4 | 0.01 | 2   | 64.2  | 84 |

|           |      |      |      |     |      |      |     |           |      |      |      |     |       |    |
|-----------|------|------|------|-----|------|------|-----|-----------|------|------|------|-----|-------|----|
| 2002/9/14 | 24.4 | 19.3 | 1.44 | 3.3 | 211  | 1158 | 89  | 1984/9/13 | 26.3 | 14.8 | 0    | 1.3 | 123.4 | 81 |
| 2002/9/15 | 21.0 | 19.4 | 5.24 | 3.8 | 478  | 1019 | 100 | 1984/9/14 | 26.4 | 16.1 | 0.48 | 1.3 | 185.1 | 82 |
| 2002/9/16 | 25.4 | 19.8 | 0.64 | 3.5 | 1189 | 1200 | 85  | 1984/9/15 | 27.5 | 16.6 | 0    | 1   | 197.3 | 82 |
| 2002/9/17 | 26.1 | 18.7 | 0    | 2.5 | 1042 | 1110 | 79  | 1984/9/16 | 26.6 | 19   | 0    | 2.3 | 224   | 83 |
| 2002/9/18 | 27.1 | 19.1 | 0    | 2.0 | 995  | 1031 | 82  | 1984/9/17 | 26.2 | 19.6 | 0    | 2   | 200.9 | 83 |
| 2002/9/19 | 27.4 | 19.8 | 0    | 2.8 | 848  | 1201 | 76  | 1984/9/18 | 26.5 | 17.9 | 0.02 | 1   | 106.8 | 84 |
| 2002/9/20 | 26.7 | 18.5 | 0    | 2.5 | 1067 | 1120 | 74  | 1984/9/19 | 27.4 | 19.2 | 0    | 0.8 | 172.9 | 86 |
| 2002/9/21 | 25.9 | 20.1 | 0    | 3.8 | 791  | 1230 | 75  | 1984/9/20 | 27.3 | 18.2 | 0    | 2.5 | 190.4 | 82 |
| 2002/9/22 | 25.2 | 17.6 | 0    | 3.5 | 971  | 1328 | 69  | 1984/9/21 | 27.9 | 19.6 | 0    | 2.5 | 209.1 | 83 |
| 2002/9/23 | 27.6 | 15.5 | 0    | 2.0 | 809  | 1149 | 63  | 1984/9/22 | 27.9 | 19.5 | 0    | 3.3 | 180.1 | 81 |
| 2002/9/24 | 27.2 | 16.0 | 0    | 1.0 | 722  | 1050 | 74  | 1984/9/23 | 27.4 | 19.6 | 0    | 2.5 | 202.8 | 80 |
| 2002/9/25 | 23.9 | 19.6 | 0    | 1.8 | 289  | 950  | 76  | 1984/9/24 | 29.1 | 19.9 | 0    | 3   | 187.8 | 81 |
| 2002/9/26 | 26.8 | 17.0 | 0    | 1.8 | 1038 | 1113 | 73  | 1984/9/25 | 26.2 | 19.5 | 0    | 4   | 16.6  | 92 |
| 2002/9/27 | 25.1 | 18.4 | 0    | 1.5 | 886  | 1101 | 80  | 1984/9/26 | 22.9 | 19.1 | 0    | 3.5 | 23.4  | 87 |
| 2002/9/28 | 27.4 | 19.6 | 0    | 2.8 | 698  | 1132 | 72  | 1984/9/27 | 27.3 | 17.4 | 0    | 2.8 | 199.3 | 87 |
| 2002/9/29 | 26.4 | 17.0 | 0    | 1.3 | 694  | 1235 | 69  | 1984/9/28 | 26.9 | 20   | 0.01 | 2.3 | 54.9  | 91 |
| 2002/9/30 | 26.8 | 15.2 | 0    | 1.3 | 747  | 1119 | 72  | 1984/9/29 | 24.3 | 17.4 | 0    | 1.5 | 152.3 | 81 |
| 2002/10/1 | 28.3 | 17.4 | 0    | 1.5 | 785  | 1120 | 70  | 1984/9/30 | 27.8 | 19.5 | 0    | 2.3 | 183.9 | 85 |
| 2002/10/2 | 27.4 | 15.9 | 0    | 2.8 | 801  | 1121 | 62  | 1984/10/1 | 31.6 | 21.3 | 0    | 2.5 | 154.6 | 96 |
| 2002/10/3 | 31.3 | 18.9 | 0    | 3.0 | 730  | 1101 | 68  | 1984/10/2 | 27.7 | 20.5 | 0    | 2.5 | 33.1  | 97 |
| 2002/10/4 | 32.2 | 19.9 | 0    | 1.8 | 608  | 1142 | 71  | 1984/10/3 | 21   | 15.1 | 1.29 | 2.8 | 26.5  | 80 |
| 2002/10/5 | 30.5 | 20.6 | 0    | 2.8 | 837  | 1138 | 72  | 1984/10/4 | 20.8 | 13.6 | 0.02 | 1.8 | 214.5 | 59 |
| 2002/10/6 | 24.9 | 18.2 | 1.12 | 2.5 | 374  | 1053 | 71  | 1984/10/5 | 20.6 | 13.9 | 0.08 | 1.8 | 96.2  | 73 |
| 2002/10/7 | 22.6 | 13.3 | 0    | 2.3 | 718  | 1203 | 54  | 1984/10/6 | 23.1 | 14.5 | 0.06 | 1.8 | 165   | 75 |
| 2002/10/8 | 22.5 | 11.9 | 0    | 1.5 | 766  | 1223 | 64  | 1984/10/7 | 23.1 | 14.2 | 0    | 2.8 | 119.4 | 76 |
| 2002/10/9 | 23.4 | 12.7 | 0    | 1.5 | 1025 | 1154 | 72  | 1984/10/8 | 23.3 | 16.9 | 0    | 3.3 | 82.3  | 78 |

|            |      |      |      |     |                  |                   |    |            |      |      |      |     |       |    |
|------------|------|------|------|-----|------------------|-------------------|----|------------|------|------|------|-----|-------|----|
| 2002/10/10 | 24.4 | 14.6 | 0    | 2.5 | 893              | 1044              | 75 | 1984/10/9  | 19.9 | 16.3 | 0.68 | 3   | 0.5   | 90 |
| 2002/10/11 | 25.9 | 16.0 | 0    | 2.5 | 891              | 1039              | 83 | 1984/10/10 | 23.6 | 13.9 | 0    | 2.8 | 194   | 80 |
| 2002/10/12 | 28.6 | 18.1 | 0    | 1.5 | 724              | 1048              | 86 | 1984/10/11 | 23.9 | 13.1 | 0    | 2   | 227.4 | 79 |
| 2002/10/13 | 26.4 | 18.8 | 0    | 2.0 | 823              | 1054              | 84 | 1984/10/12 | 22.5 | 14.3 | 0    | 2   | 56    | 91 |
| 2002/10/14 | 26.7 | 17.2 | 0    | 2.0 | 641              | 1212              | 86 | 1984/10/13 | 19.6 | 15.7 | 0.26 | 2.3 | 126.2 | 74 |
| 2002/10/15 | 27.6 | 19.5 | 0    | 2.0 | 589              | 1136              | 71 | 1984/10/14 | 20.4 | 13.9 | 0    | 1.3 | 73.5  | 81 |
| 2002/10/16 | 27.4 | 16.1 | 0    | 2.8 | 703              | 1106              | 80 | 1984/10/15 | 21.4 | 14.9 | 0    | 0.3 | 119.4 | 82 |
| 2002/10/17 | 26.3 | 19.8 | 0.12 | 4.5 | 716              | 1126              | 89 | 1984/10/16 | 23.5 | 15.2 | 0    | 0.8 | 117   | 83 |
| 2002/10/18 | 22.5 | 18.1 | 2.31 | 4.0 | 715              | 1029              | 96 | 1984/10/17 | 23.5 | 15.2 | 0    | 0.8 | 118.9 | 80 |
| 2002/10/19 | 18.7 | 17.7 | 0.7  | 4.5 | 374              | 1200              | 94 | 1984/10/18 | 23.9 | 16.3 | 0    | 1.8 | 145.8 | 77 |
| 2002/10/20 | 18.2 | 16.6 | 0.86 | 3.3 | 379              | 1119              | 98 | 1984/10/19 | 25.3 | 12.8 | 0    | 3.3 | 185.8 | 70 |
| 2002/10/21 | 16.9 | 12.8 | 0.12 | 4.0 | 826              | 1058              | 81 | 1984/10/20 | 18.8 | 9.3  | 0    | 3.3 | 205.3 | 62 |
| 2002/10/22 | 16.4 | 10.5 | 0    | 3.0 | 919              | 1144              | 69 | 1984/10/21 | 20.6 | 7.3  | 0    | 1.5 | 196.8 | 63 |
| 2002/10/23 | 16.2 | 11.7 | 0    | 1.8 | 677              | 1258              | 69 | 1984/10/22 | 23.5 | 8.5  | 0    | 2.8 | 191.9 | 70 |
| 2002/10/24 | 19.0 | 9.8  | 0    | 1.8 | 657              | 1219              | 76 | 1984/10/23 | 23.5 | 11.2 | 0    | 0.3 | 136.5 | 72 |
| 2002/10/25 | 21.8 | 9.7  | 0    | 1.8 | 762              | 1201              | 78 | 1984/10/24 | 24.5 | 15.7 | 0    | 2   | 192.1 | 72 |
| 2002/10/26 | 18.5 | 9.7  | 0    | 4.8 | 715              | 1154              | 64 | 1984/10/25 | 25.1 | 14.9 | 0.01 | 1.8 | 141.6 | 94 |
| 2002/10/27 | 17.6 | 4.7  | 0    | 1.5 | 722              | 1154              | 61 | 1984/10/26 | 24.5 | 14.4 | 0    | 1   | 187.2 | 93 |
| 2002/10/28 | 19.5 | 9.1  | 0    | 1.8 | 606              | 1139              | 77 | 1984/10/27 | 20.7 | 13.4 | 0    | 2.3 | 138.5 | 73 |
| 2002/10/29 | 16.5 | 13.2 | 0    | 3.8 | 226              | 1148              | 79 | 1984/10/28 | 19.9 | 10.7 | 0    | 2   | 178.5 | 77 |
| 2002/10/30 | 16.1 | 12.1 | 0.43 | 2.5 | 321              | 1304              | 87 | 1984/10/29 | 17.9 | 9.3  | 0    | 2.8 | 190.9 | 63 |
| 2002/10/31 | 16.4 | 14.0 | 2.52 | 4.5 | 546 <sup>@</sup> | 1200 <sup>@</sup> | 98 | 1984/10/30 | 18.3 | 9.5  | 0    | 2.3 | 187.2 | 65 |
| 2002/11/1  | 16.0 | 11.0 | 0.02 | 3.3 | 770              | 1137              | 74 | 1984/10/31 | 19.3 | 8.8  | 0    | 1.8 | 168.9 | 71 |
| 2002/11/2  | 14.7 | 6.8  | 0    | 3.0 | 644              | 1131              | 52 | 1984/11/1  | 18.8 | 12.6 | 0    | 0.8 | 90.5  | 69 |
| 2002/11/3  | 13.9 | 8.1  | 0    | 4.5 | 627              | 1152              | 50 | 1984/11/2  | 17.4 | 11.6 | 0    | 1.5 | 83.8  | 78 |
| 2002/11/4  | 16.9 | 5.4  | 0    | 2.5 | 644              | 1127              | 45 | 1984/11/3  | 20.2 | 10.3 | 0    | 2   | 174.3 | 79 |

|            |      |      |      |     |                  |                   |    |            |      |      |      |     |       |    |
|------------|------|------|------|-----|------------------|-------------------|----|------------|------|------|------|-----|-------|----|
| 2002/11/5  | 19.1 | 9.7  | 0    | 2.5 | 686              | 1115              | 58 | 1984/11/4  | 22.2 | 10.4 | 0    | 3   | 173.4 | 73 |
| 2002/11/6  | 21.5 | 8.4  | 0    | 2.8 | 670              | 1238              | 77 | 1984/11/5  | 23.6 | 11.6 | 0    | 3.3 | 169.3 | 72 |
| 2002/11/7  | 22.4 | 13.5 | 0    | 3.3 | 624              | 1227              | 76 | 1984/11/6  | 26.2 | 14.7 | 0    | 1.5 | 146.6 | 84 |
| 2002/11/8  | 15.5 | 8.9  | 0    | 3.8 | 640              | 1148              | 56 | 1984/11/7  | 25.5 | 14.2 | 0    | 1.3 | 125.8 | 90 |
| 2002/11/9  | 13.9 | 5.1  | 0    | 2.0 | 676              | 1136              | 56 | 1984/11/8  | 21.7 | 15.3 | 0    | 0.8 | 87.4  | 92 |
| 2002/11/10 | 20.5 | 9.4  | 0    | 3.8 | 617              | 1023              | 65 | 1984/11/9  | 19.3 | 15.9 | 0    | 2   | 25.5  | 96 |
| 2002/11/11 | 23.4 | 14.4 | 0    | 2.3 | 467              | 1200              | 71 | 1984/11/10 | 20.3 | 18   | 0.88 | 1.8 | 0     | 98 |
| 2002/11/12 | 20.6 | 11.5 | 0    | 2.0 | 465              | 1212              | 80 | 1984/11/11 | 19.1 | 14.4 | 1.14 | 3.3 | 14.6  | 90 |
| 2002/11/13 | 16.4 | 13.7 | 0    | 4.0 | 269              | 1221              | 79 | 1984/11/12 | 16.9 | 13.8 | 0    | 2.8 | 44.2  | 75 |
| 2002/11/14 | 16.7 | 13.9 | 0    | 3.5 | 208 <sup>@</sup> | 1200 <sup>@</sup> | 85 | 1984/11/13 | 15.3 | 12.9 | 0.02 | 3.5 | 17.4  | 84 |
| 2002/11/15 | 14.4 | 11.1 | 0.21 | 3.3 | 147              | 1233              | 74 | 1984/11/14 | 19   | 13.7 | 0.33 | 2.5 | 5.8   | 97 |
| 2002/11/16 | 16.0 | 7.3  | 0    | 2.3 | 595              | 1239              | 68 | 1984/11/15 | 15.5 | 12.5 | 0.15 | 2.5 | 36.8  | 92 |
| 2002/11/17 | 13.7 | 7.8  | 0    | 2.5 | 529              | 1112              | 83 | 1984/11/16 | 19.2 | 8.5  | 0    | 1   | 168.4 | 89 |
| 2002/11/18 | 10.0 | 3.5  | 0    | 3.3 | 693              | 1120              | 65 | 1984/11/17 | 18.6 | 11.9 | 0    | 2   | 122.1 | 82 |
| 2002/11/19 | 15.7 | 2.9  | 0    | 3.8 | 608              | 1149              | 72 | 1984/11/18 | 20.4 | 10   | 0    | 1.3 | 135.6 | 85 |
| 2002/11/20 | 14.1 | 11.2 | 0.84 | 2.3 | 15               | 1126              | 92 | 1984/11/19 | 15.4 | 4.9  | 0    | 5.5 | 45    | 75 |
| 2002/11/21 | 12.2 | 10.6 | 0.7  | 3.5 | 174 <sup>@</sup> | 1200 <sup>@</sup> | 86 | 1984/11/20 | 8.2  | 4.1  | 0    | 3.3 | 97.2  | 74 |
| 2002/11/22 | 13.1 | 8.8  | 0    | 2.0 | 332              | 827               | 74 | 1984/11/21 | 12.1 | 6.9  | 0    | 3   | 69    | 72 |
| 2002/11/23 | 14.3 | 6.9  | 0    | 2.3 | 583              | 1140              | 79 | 1984/11/22 | 15.1 | 7.2  | 0    | 1.5 | 93.4  | 83 |
| 2002/11/24 | 11.3 | 8.5  | 0    | 2.5 | 392              | 935               | 82 | 1984/11/23 | 15.1 | 6.2  | 0    | 1   | 147.2 | 83 |
| 2002/11/25 | 11.7 | 2.8  | 0    | 2.5 | 587              | 1221              | 82 | 1984/11/24 | 11.9 | 6.6  | 0    | 2.8 | 18.5  | 80 |
| 2002/11/26 | 10.5 | 4.7  | 0    | 4.0 | 626              | 1218              | 49 | 1984/11/25 | 11.1 | 3.8  | 0    | 2.3 | 148.1 | 75 |
| 2002/11/27 | 11.6 | -1.4 | 0    | 1.5 | 579              | 1227              | 55 | 1984/11/26 | 13.9 | 3.2  | 0    | 0.5 | 137.8 | 80 |
| 2002/11/28 | 18.0 | 4.8  | 0    | 2.5 | 565              | 1201              | 68 | 1984/11/27 | 9.2  | 6.3  | 0    | 3.3 | 31.7  | 74 |
| 2002/11/29 | 18.9 | 6.7  | 0    | 1.5 | 434              | 1359              | 84 | 1984/11/28 | 10.5 | 2.4  | 0    | 1   | 94.3  | 80 |
| 2002/11/30 | 16.1 | 8.7  | 0    | 1.8 | 420              | 1329              | 90 | 1984/11/29 | 14.9 | 2    | 0    | 0.3 | 139   | 82 |

|            |      |      |      |     |                  |                   |    |            |      |      |      |     |       |    |
|------------|------|------|------|-----|------------------|-------------------|----|------------|------|------|------|-----|-------|----|
| 2002/12/1  | 16.1 | 4.4  | 0    | 2.0 | 586              | 1123              | 87 | 1984/11/30 | 16.7 | 3.1  | 0    | 1.5 | 123   | 81 |
| 2002/12/2  | 16.7 | 11.0 | 0.07 | 4.0 | 378              | 1416              | 84 | 1984/12/1  | 14.1 | 3.4  | 0    | 2   | 144.6 | 73 |
| 2002/12/3  | 15.1 | 12.0 | 1.07 | 5.0 | 427              | 1150              | 94 | 1984/12/2  | 13.2 | 0.3  | 0    | 2.5 | 152.1 | 69 |
| 2002/12/4  | 14.5 | 11.3 | 0    | 2.8 | 653              | 1212              | 87 | 1984/12/3  | 16.1 | 5.6  | 0    | 3.5 | 153.1 | 76 |
| 2002/12/5  | 13.8 | 9.7  | 0.77 | 3.5 | 84               | 905               | 95 | 1984/12/4  | 13.1 | 7    | 0    | 2.8 | 60.6  | 89 |
| 2002/12/6  | 11.6 | 8.0  | 0.74 | 4.8 | 102              | 1050              | 91 | 1984/12/5  | 7.4  | 2.6  | 0    | 2.8 | 46.5  | 69 |
| 2002/12/7  | 9.3  | 5.8  | 1.04 | 4.5 | 137              | 1158              | 90 | 1984/12/6  | 10.3 | -0.6 | 0    | 0.3 | 154.1 | 71 |
| 2002/12/8  | 5.8  | 0.9  | 0.05 | 5.3 | 665              | 1150              | 76 | 1984/12/7  | 14.4 | 2.9  | 0    | 3   | 122.9 | 78 |
| 2002/12/9  | 4.0  | -1.4 | 0    | 3.5 | 570              | 1206              | 68 | 1984/12/8  | 17.8 | 5.7  | 0    | 2   | 129.6 | 82 |
| 2002/12/10 | 6.6  | -2.1 | 0    | 0.8 | 519              | 1109              | 78 | 1984/12/9  | 12.2 | 7.8  | 0.04 | 1.8 | 13    | 97 |
| 2002/12/11 | 8.5  | -0.2 | 0    | 1.3 | 591              | 1138              | 77 | 1984/12/10 | 10.3 | 5.9  | 0    | 1.3 | 19.3  | 90 |
| 2002/12/12 | 9.0  | 2.3  | 0    | 1.5 | 507              | 1228              | 72 | 1984/12/11 | 11.3 | 6.9  | 0.01 | 2   | 28.9  | 81 |
| 2002/12/13 | 10.4 | 2.7  | 0    | 1.5 | 506              | 1149              | 72 | 1984/12/12 | 10.4 | 7.5  | 0    | 1.8 | 28.4  | 80 |
| 2002/12/14 | 14.7 | 2.9  | 0    | 3.8 | 586              | 1123              | 81 | 1984/12/13 | 9.9  | 8.4  | 0.98 | 0.8 | 2.4   | 94 |
| 2002/12/15 | 18.0 | 7.6  | 0    | 1.8 | 378              | 1416              | 84 | 1984/12/14 | 10.4 | 7.7  | 2.28 | 4.3 | 0     | 93 |
| 2002/12/16 | 13.4 | 5.7  | 0    | 3.8 | 427              | 1150              | 80 | 1984/12/15 | 9.5  | 7.2  | 1.07 | 3.5 | 7.4   | 89 |
| 2002/12/17 | 7.5  | 3.6  | 2.09 | 2.0 | 107              | 1200              | 89 | 1984/12/16 | 7.9  | 5.7  | 1.54 | 3   | 19.9  | 87 |
| 2002/12/18 | 9.0  | 7.3  | 2.05 | 4.5 | 342 <sup>@</sup> | 1200 <sup>@</sup> | 97 | 1984/12/17 | 6.9  | 1.2  | 0.45 | 2.5 | 42    | 87 |
| 2002/12/19 | 11.4 | 7.6  | 0.45 | 5.3 | 577              | 1212              | 86 | 1984/12/18 | 3.1  | -1.1 | 0.65 | 2.5 | 87.4  | 72 |
| 2002/12/20 | 11.5 | 7.7  | 0.07 | 5.0 | 200              | 1102              | 87 | 1984/12/19 | 1.5  | -1.8 | 0    | 1.8 | 52.1  | 66 |
| 2002/12/21 | 13.0 | 9.4  | 0.14 | 4.3 | 179              | 1408              | 87 | 1984/12/20 | 3.7  | -2.8 | 0    | 1.3 | 104.5 | 69 |
| 2002/12/22 | 10.2 | 8.2  | 0    | 4.3 | 680              | 1248              | 85 | 1984/12/21 | 3.8  | 0.2  | 0    | 2.8 | 66.7  | 64 |
| 2002/12/23 | 8.6  | 6.8  | 0.3  | 3.0 | 46               | 1045              | 95 | 1984/12/22 | 0.6  | -3.7 | 0    | 2.8 | 119.2 | 50 |
| 2002/12/24 | 6.8  | 3.0  | 0.09 | 3.3 | 59               | 1227              | 85 | 1984/12/23 | 0.6  | -3.9 | 0    | 2.8 | 109   | 53 |
| 2002/12/25 | 3.2  | -1.3 | 0    | 4.5 | 196              | 1312              | 67 | 1984/12/24 | 0.5  | -6.0 | 0    | 2   | 120.9 | 50 |
| 2002/12/26 | 0.8  | -3.6 | 0    | 4.5 | 550              | 1144              | 54 | 1984/12/25 | 2.9  | -6.2 | 0    | 0.5 | 129.3 | 66 |

| 2002/12/27 | 3.4        | −2.4       | 0   | 2.5 | 536              | 1203 | 52 | 1984/12/26 | 2.7        | −4.1       | 0    | 1.5 | 99.4             | 62 |
|------------|------------|------------|-----|-----|------------------|------|----|------------|------------|------------|------|-----|------------------|----|
| 2002/12/28 | 6.0        | −3.3       | 0   | 1.0 | 422              | 1059 | 54 | 1984/12/27 | 3.1        | −5.2       | 0    | 2.5 | 111.5            | 58 |
| 2002/12/29 | 6.1        | 1.3        | 0   | 1.3 | 335              | 1055 | 45 | 1984/12/28 | 2.3        | −4.8       | 0    | 2.8 | 112              | 53 |
| 2002/12/30 | 7.4        | 1.9        | 0   | 1.8 | 177              | 1123 | 63 | 1984/12/29 | 1.9        | −7.0       | 0    | 1.3 | 141.7            | 56 |
| 2002/12/31 | 5.4        | −0.1       | 0   | 2.5 | 415              | 1212 | 72 | 1984/12/30 | 5.1        | −6.2       | 0    | 0   | 102.2            | 64 |
|            |            |            |     |     |                  |      |    | 1984/12/31 | 8.2        | −3.0       | 0    | 2   | 134.7            | 61 |
| FQP        |            |            |     |     |                  |      |    | YTA        |            |            |      |     |                  |    |
| Date       | $T_{\max}$ | $T_{\min}$ | $P$ | $W$ | $R_{\text{ave}}$ | RH   |    | Date       | $T_{\max}$ | $T_{\min}$ | $P$  | $W$ | $R_{\text{ave}}$ | RH |
| 1986/1/1   | 3.6        | −6.4       | 0   | 0.8 | 139.0            | 89   |    | 1992/1/1   | 5.8        | 1.6        | 0    | 1.3 | 30.8             | 85 |
| 1986/1/2   | 3.1        | −4.2       | 0   | 3.5 | 70.4             | 91   |    | 1992/1/2   | 8.6        | 3.4        | 0    | 0.3 | 36.6             | 82 |
| 1986/1/3   | 9.4        | −2.1       | 0   | 6.8 | 125.7            | 32   |    | 1992/1/3   | 7.8        | 3.3        | 1.47 | 1.0 | 0.0              | 97 |
| 1986/1/4   | −2.0       | −8.1       | 0   | 1.0 | 131.8            | 35   |    | 1992/1/4   | 8.0        | 3.8        | 0.37 | 2.8 | 5.7              | 87 |
| 1986/1/5   | 3.7        | −8.2       | 0   | 2.8 | 144.8            | 49   |    | 1992/1/5   | 7.1        | 5.2        | 2.21 | 1.8 | 0.0              | 97 |
| 1986/1/6   | 8.4        | −6.9       | 0   | 3.0 | 106.9            | 54   |    | 1992/1/6   | 8.5        | 5.1        | 0.04 | 1.8 | 23.4             | 81 |
| 1986/1/7   | 7.8        | −1.4       | 0   | 3.5 | 141.4            | 41   |    | 1992/1/7   | 8.4        | 2.9        | 0    | 1.8 | 84.0             | 86 |
| 1986/1/8   | 8.1        | −5.9       | 0   | 3.3 | 148.6            | 51   |    | 1992/1/8   | 7.2        | 3.5        | 0.02 | 2.0 | 27.0             | 87 |
| 1986/1/9   | 6.6        | −4.7       | 0   | 1.8 | 131.7            | 56   |    | 1992/1/9   | 9.9        | −0.8       | 0    | 0.8 | 153.2            | 85 |
| 1986/1/10  | 4.1        | −5.9       | 0   | 2.5 | 118.3            | 60   |    | 1992/1/10  | 7.1        | 2.6        | 0    | 2.8 | 125.5            | 72 |
| 1986/1/11  | 3.3        | −4.7       | 0   | 1.8 | 106.8            | 77   |    | 1992/1/11  | 12.5       | 2.5        | 0    | 0.8 | 84.6             | 68 |
| 1986/1/12  | 4.5        | −5.3       | 0   | 2.0 | 116.8            | 70   |    | 1992/1/12  | 8.3        | 2.6        | 0.15 | 1.3 | 135.3            | 89 |
| 1986/1/13  | 3.6        | −8.2       | 0   | 2.3 | 91.0             | 51   |    | 1992/1/13  | 9.8        | 4.6        | 0.14 | 1.5 | 34.8             | 82 |
| 1986/1/14  | 3.5        | −1.5       | 0   | 3.8 | 116.7            | 67   |    | 1992/1/14  | 7.4        | −0.3       | 0    | 1.3 | 152.3            | 59 |
| 1986/1/15  | 12.5       | −4.3       | 0   | 3.8 | 141.0            | 65   |    | 1992/1/15  | 7.5        | −2.5       | 0    | 0.8 | 164.1            | 67 |
| 1986/1/16  | 11.4       | −3.7       | 0   | 1.3 | 109.5            | 69   |    | 1992/1/16  | 11.5       | −1.6       | 0    | 0.5 | 136.0            | 68 |
| 1986/1/17  | 6.3        | 2.4        | 0   | 1.8 | 30.9             | 79   |    | 1992/1/17  | 12.0       | −1.2       | 0    | 0.0 | 160.6            | 70 |
| 1986/1/18  | 7.1        | −1.0       | 0   | 3.0 | 127.7            | 62   |    | 1992/1/18  | 11.3       | 3.0        | 0    | 3.5 | 152.3            | 43 |

|           |      |      |   |     |       |    |
|-----------|------|------|---|-----|-------|----|
| 1986/1/19 | 8.0  | -2.3 | 0 | 3.3 | 124.1 | 94 |
| 1986/1/20 | 3.6  | -1.0 | 0 | 4.0 | 35.5  | 92 |
| 1986/1/21 | -0.1 | -3.8 | 0 | 4.5 | 53.9  | 64 |
| 1986/1/22 | 6.3  | -6.4 | 0 | 2.8 | 151.0 | 64 |
| 1986/1/23 | 9.1  | -5.0 | 0 | 3.3 | 163.9 | 27 |
| 1986/1/24 | 8.0  | -5.0 | 0 | 1.0 | 122.5 | 45 |
| 1986/1/25 | 7.0  | -2.3 | 0 | 2.5 | 144.2 | 57 |
| 1986/1/26 | 6.7  | -3.8 | 0 | 1.8 | 150.8 | 56 |
| 1986/1/27 | 7.7  | -7.1 | 0 | 3.0 | 148.3 | 61 |
| 1986/1/28 | 9.8  | -3.1 | 0 | 2.0 | 81.0  | 66 |
| 1986/1/29 | 11.8 | -2.0 | 0 | 1.8 | 119.3 | 63 |
| 1986/1/30 | 6.5  | 0.8  | 0 | 4.3 | 71.1  | 56 |
| 1986/1/31 | 4.0  | -3.5 | 0 | 1.8 | 107.4 | 66 |
| 1986/2/1  | 8.2  | -4.2 | 0 | 3.8 | 143.8 | 63 |
| 1986/2/2  | 2.3  | -1.9 | 0 | 4.3 | 105.9 | 49 |
| 1986/2/3  | 4.3  | -7.7 | 0 | 1.5 | 167.4 | 40 |
| 1986/2/4  | 4.9  | -4.6 | 0 | 2.5 | 84.7  | 46 |
| 1986/2/5  | 5.3  | -3.5 | 0 | 2.3 | 146.9 | 42 |
| 1986/2/6  | 4.3  | -8.6 | 0 | 1.5 | 169.1 | 43 |
| 1986/2/7  | 6.1  | -6.3 | 0 | 2.5 | 155.6 | 45 |
| 1986/2/8  | 8.2  | -7.7 | 0 | 2.0 | 144.4 | 48 |
| 1986/2/9  | 7.5  | 0.6  | 0 | 2.5 | 77.0  | 49 |
| 1986/2/10 | 7.5  | -3.5 | 0 | 3.8 | 160.1 | 55 |
| 1986/2/11 | 10.2 | -6.1 | 0 | 2.0 | 176.4 | 63 |
| 1986/2/12 | 4.5  | -1.5 | 0 | 2.0 | 32.9  | 69 |
| 1986/2/13 | 13.7 | -1.2 | 0 | 1.5 | 164.6 | 59 |

|           |      |      |      |     |       |    |
|-----------|------|------|------|-----|-------|----|
| 1992/1/19 | 7.6  | 4.1  | 0    | 2.8 | 95.7  | 52 |
| 1992/1/20 | 6.3  | 2.0  | 0.36 | 0.5 | 28.2  | 87 |
| 1992/1/21 | 10.9 | 2.6  | 0    | 0.3 | 159.1 | 81 |
| 1992/1/22 | 13.0 | -0.4 | 0    | 0.5 | 115.6 | 80 |
| 1992/1/23 | 14.8 | 3.5  | 0    | 0.5 | 72.1  | 74 |
| 1992/1/24 | 14.7 | 2.2  | 0    | 1.5 | 80.3  | 72 |
| 1992/1/25 | 16.4 | 7.5  | 0.22 | 1.0 | 88.4  | 76 |
| 1992/1/26 | 16.0 | 4.7  | 0    | 1.0 | 141.9 | 79 |
| 1992/1/27 | 18.7 | 3.5  | 0    | 0.5 | 145.8 | 73 |
| 1992/1/28 | 20.2 | 9.5  | 0    | 2.0 | 147.7 | 61 |
| 1992/1/29 | 20.3 | 13.1 | 0    | 2.0 | 150.9 | 63 |
| 1992/1/30 | 18.0 | 9.3  | 1.46 | 1.3 | 112.8 | 83 |
| 1992/1/31 | 10.0 | 4.6  | 1.45 | 2.5 | 96.4  | 82 |
| 1992/2/1  | 8.5  | -0.1 | 0    | 3.3 | 188.1 | 64 |
| 1992/2/2  | 7.9  | 4.2  | 0.34 | 2.5 | 75.2  | 75 |
| 1992/2/3  | 8.2  | 3.5  | 3.62 | 2.8 | 30.9  | 96 |
| 1992/2/4  | 4.4  | 3.0  | 1.37 | 2.0 | 10.6  | 94 |
| 1992/2/5  | 8.1  | 2.5  | 0.01 | 2.0 | 28.1  | 76 |
| 1992/2/6  | 10.4 | 2.9  | 0    | 0.3 | 89.6  | 82 |
| 1992/2/7  | 8.7  | 2.6  | 1.89 | 3.3 | 56.2  | 89 |
| 1992/2/8  | 6.2  | 2.3  | 0.07 | 3.8 | 39.4  | 83 |
| 1992/2/9  | 3.3  | 0.2  | 1.79 | 1.3 | 22.7  | 96 |
| 1992/2/10 | 5.3  | 2.2  | 0    | 2.8 | 25.5  | 89 |
| 1992/2/11 | 5.7  | 2.8  | 0.15 | 2.5 | 108.7 | 85 |
| 1992/2/12 | 11.1 | 3.8  | 0.03 | 0.0 | 150.3 | 84 |
| 1992/2/13 | 15.2 | 2.2  | 0    | 2.0 | 191.9 | 68 |

|           |      |      |      |     |       |    |
|-----------|------|------|------|-----|-------|----|
| 1986/2/14 | 7.9  | -0.4 | 0    | 5.8 | 151.7 | 55 |
| 1986/2/15 | 6.6  | -3.3 | 0    | 2.3 | 170.3 | 48 |
| 1986/2/16 | 4.2  | 0.3  | 0    | 2.3 | 51.5  | 54 |
| 1986/2/17 | 6.9  | -0.3 | 0    | 1.5 | 171.3 | 60 |
| 1986/2/18 | 10.8 | -5.0 | 0    | 1.3 | 165.6 | 71 |
| 1986/2/19 | 9.2  | -0.9 | 0    | 4.0 | 151.0 | 77 |
| 1986/2/20 | 7.4  | -1.3 | 0    | 3.5 | 197.1 | 60 |
| 1986/2/21 | 11.5 | -3.9 | 0    | 2.3 | 202.9 | 51 |
| 1986/2/22 | 12.5 | -4.2 | 0    | 1.8 | 172.0 | 47 |
| 1986/2/23 | 13.7 | -3.1 | 0    | 2.5 | 201.7 | 50 |
| 1986/2/24 | 10.0 | -2.6 | 0    | 2.5 | 182.1 | 61 |
| 1986/2/25 | 12.5 | -1.0 | 0    | 3.0 | 124.5 | 61 |
| 1986/2/26 | 6.0  | -4.3 | 0    | 4.3 | 101.2 | 28 |
| 1986/2/27 | 2.8  | -7.4 | 0    | 1.3 | 205.2 | 40 |
| 1986/2/28 | 4.4  | -6.7 | 0    | 1.0 | 153.1 | 50 |
| 1986/3/1  | 8.1  | -6.7 | 0    | 2.5 | 215.6 | 36 |
| 1986/3/2  | 12.6 | -5.0 | 0    | 3.5 | 231.0 | 35 |
| 1986/3/3  | 17.4 | 1.1  | 0    | 3.5 | 238.3 | 29 |
| 1986/3/4  | 19.5 | -1.2 | 0    | 1.8 | 242.1 | 31 |
| 1986/3/5  | 20.7 | -0.4 | 0    | 2.0 | 232.3 | 32 |
| 1986/3/6  | 21.4 | 0.4  | 0    | 1.5 | 214.7 | 41 |
| 1986/3/7  | 22.8 | 6.1  | 0    | 3.5 | 193.1 | 28 |
| 1986/3/8  | 15.3 | 5.6  | 0.65 | 3.8 | 20.5  | 67 |
| 1986/3/9  | 9.5  | 1.5  | 0.16 | 2.8 | 144.6 | 63 |
| 1986/3/10 | 8.7  | 0.0  | 0    | 3.5 | 95.8  | 71 |
| 1986/3/11 | 16.5 | -0.2 | 0    | 2.0 | 191.9 | 76 |

|           |      |      |      |     |       |    |
|-----------|------|------|------|-----|-------|----|
| 1992/2/14 | 12.7 | 8.0  | 0.74 | 2.3 | 58.0  | 69 |
| 1992/2/15 | 15.9 | 8.0  | 0.78 | 0.5 | 52.0  | 77 |
| 1992/2/16 | 15.2 | 5.1  | 0    | 2.8 | 57.3  | 60 |
| 1992/2/17 | 13.0 | 8.3  | 0    | 2.0 | 76.9  | 68 |
| 1992/2/18 | 12.7 | 8.2  | 0.36 | 2.8 | 28.6  | 85 |
| 1992/2/19 | 10.4 | 4.8  | 2.1  | 4.5 | 0.7   | 86 |
| 1992/2/20 | 11.3 | 3.4  | 0.04 | 1.5 | 88.1  | 74 |
| 1992/2/21 | 12.3 | 4.9  | 0    | 1.5 | 81.2  | 66 |
| 1992/2/22 | 14.9 | 6.8  | 0    | 1.3 | 125.3 | 64 |
| 1992/2/23 | 17.2 | 6.4  | 0    | 0.8 | 187.6 | 63 |
| 1992/2/24 | 15.0 | 3.5  | 0    | 0.8 | 217.7 | 49 |
| 1992/2/25 | 18.2 | 2.9  | 0    | 0.3 | 172.8 | 60 |
| 1992/2/26 | 21.9 | 10.2 | 0    | 0.3 | 147.9 | 55 |
| 1992/2/27 | 25.2 | 12.2 | 0    | 0.8 | 149.0 | 60 |
| 1992/2/28 | 19.9 | 13.6 | 0    | 1.3 | 93.1  | 76 |
| 1992/2/29 | 28.5 | 13.5 | 0    | 1.8 | 42.7  | 69 |
| 1992/3/1  | 23.6 | 16.6 | 1.16 | 1.5 | 104.7 | 72 |
| 1992/3/2  | 18.2 | 12.6 | 1.88 | 1.5 | 50.9  | 95 |
| 1992/3/3  | 14.0 | 7.7  | 1.73 | 2.3 | 12.0  | 92 |
| 1992/3/4  | 9.9  | 4.1  | 3.01 | 3.5 | 26.9  | 96 |
| 1992/3/5  | 5.0  | 2.6  | 0.47 | 2.5 | 41.7  | 90 |
| 1992/3/6  | 9.1  | 2.3  | 0    | 0.8 | 112.5 | 76 |
| 1992/3/7  | 9.2  | 5.5  | 0    | 1.8 | 80.6  | 65 |
| 1992/3/8  | 11.2 | 6.0  | 0    | 0.3 | 21.2  | 69 |
| 1992/3/9  | 17.1 | 8.5  | 0    | 0.3 | 63.0  | 71 |
| 1992/3/10 | 16.6 | 11.5 | 0.02 | 2.0 | 37.6  | 75 |

|           |      |      |      |     |       |    |
|-----------|------|------|------|-----|-------|----|
| 1986/3/12 | 16.6 | 3.8  | 0    | 2.5 | 185.8 | 78 |
| 1986/3/13 | 14.3 | 5.0  | 0.08 | 5.0 | 39.5  | 76 |
| 1986/3/14 | 15.3 | 2.0  | 0    | 2.3 | 212.8 | 83 |
| 1986/3/15 | 10.7 | 2.7  | 0    | 7.3 | 123.7 | 48 |
| 1986/3/16 | 10.9 | 1.0  | 0    | 4.5 | 174.4 | 32 |
| 1986/3/17 | 7.8  | 0.0  | 1.57 | 2.8 | 7.8   | 87 |
| 1986/3/18 | 12.6 | -0.7 | 0    | 3.8 | 241.0 | 80 |
| 1986/3/19 | 12.8 | 0.6  | 0    | 3.0 | 136.3 | 65 |
| 1986/3/20 | 11.0 | 6.6  | 0    | 2.0 | 101.0 | 64 |
| 1986/3/21 | 12.2 | 3.7  | 0    | 1.0 | 177.5 | 65 |
| 1986/3/22 | 14.7 | 4.0  | 0    | 1.0 | 146.5 | 67 |
| 1986/3/23 | 16.2 | 4.1  | 0    | 3.3 | 170.9 | 62 |
| 1986/3/24 | 16.0 | 4.2  | 0    | 2.5 | 176.0 | 74 |
| 1986/3/25 | 18.9 | 5.2  | 0    | 2.0 | 166.0 | 65 |
| 1986/3/26 | 18.0 | 7.9  | 0    | 3.0 | 149.4 | 66 |
| 1986/3/27 | 16.8 | 6.2  | 0    | 2.8 | 179.5 | 82 |
| 1986/3/28 | 17.3 | 7.8  | 0    | 2.8 | 115.0 | 81 |
| 1986/3/29 | 15.0 | 7.4  | 0    | 4.0 | 126.5 | 68 |
| 1986/3/30 | 16.9 | 7.6  | 0    | 2.3 | 264.7 | 51 |
| 1986/3/31 | 20.0 | 4.3  | 0    | 4.3 | 205.6 | 51 |
| 1986/4/1  | 22.2 | 5.5  | 0    | 3.0 | 212.6 | 47 |
| 1986/4/2  | 16.7 | 10.6 | 0    | 1.8 | 68.5  | 64 |
| 1986/4/3  | 21.1 | 8.2  | 0    | 2.0 | 229.2 | 68 |
| 1986/4/4  | 20.7 | 10.2 | 0    | 2.5 | 213.2 | 50 |
| 1986/4/5  | 24.4 | 10.6 | 0    | 3.3 | 231.0 | 43 |
| 1986/4/6  | 23.0 | 10.4 | 0    | 3.3 | 258.2 | 32 |

|           |      |      |      |     |       |    |
|-----------|------|------|------|-----|-------|----|
| 1992/3/11 | 21.0 | 10.4 | 0    | 1.0 | 57.5  | 67 |
| 1992/3/12 | 17.1 | 11.7 | 0.31 | 0.8 | 0.0   | 89 |
| 1992/3/13 | 23.3 | 13.0 | 0.46 | 1.3 | 155.8 | 86 |
| 1992/3/14 | 25.5 | 16.5 | 0.02 | 2.5 | 158.6 | 77 |
| 1992/3/15 | 28.0 | 17.2 | 1.28 | 1.3 | 183.6 | 85 |
| 1992/3/16 | 20.1 | 8.2  | 0.44 | 3.0 | 125.3 | 94 |
| 1992/3/17 | 9.3  | 4.7  | 1.67 | 2.8 | 2.7   | 87 |
| 1992/3/18 | 5.4  | 2.5  | 1.35 | 2.0 | 12.6  | 90 |
| 1992/3/19 | 7.5  | 4.7  | 5.82 | 0.5 | 19.0  | 95 |
| 1992/3/20 | 8.6  | 6.7  | 3.51 | 2.3 | 31.9  | 95 |
| 1992/3/21 | 11.9 | 6.0  | 1.53 | 2.3 | 116.6 | 87 |
| 1992/3/22 | 7.6  | 6.2  | 2.33 | 2.8 | 28.8  | 94 |
| 1992/3/23 | 9.4  | 5.6  | 0.91 | 1.0 | 30.3  | 91 |
| 1992/3/24 | 8.5  | 5.7  | 2.64 | 1.3 | 1.9   | 94 |
| 1992/3/25 | 8.7  | 6.4  | 5.03 | 2.5 | 17.8  | 97 |
| 1992/3/26 | 8.5  | 6.2  | 2.3  | 1.3 | 11.7  | 97 |
| 1992/3/27 | 8.9  | 7.4  | 2.21 | 2.0 | 22.3  | 96 |
| 1992/3/28 | 10.0 | 7.5  | 0.83 | 1.0 | 33.4  | 95 |
| 1992/3/29 | 15.2 | 8.6  | 1.08 | 0.8 | 117.1 | 87 |
| 1992/3/30 | 13.2 | 9.8  | 0.6  | 1.3 | 17.2  | 94 |
| 1992/3/31 | 12.8 | 10.7 | 1.31 | 0.3 | 33.3  | 96 |
| 1992/4/1  | 18.1 | 11.5 | 0    | 0.3 | 82.2  | 88 |
| 1992/4/2  | 20.1 | 12.7 | 0.01 | 3.3 | 44.4  | 78 |
| 1992/4/3  | 17.6 | 14.0 | 0.1  | 0.8 | 50.5  | 80 |
| 1992/4/4  | 23.8 | 12.1 | 0    | 0.5 | 210.6 | 80 |
| 1992/4/5  | 27.9 | 13.1 | 0    | 2.8 | 136.1 | 66 |

|           |      |      |      |     |       |    |
|-----------|------|------|------|-----|-------|----|
| 1986/4/7  | 22.2 | 8.5  | 0    | 2.3 | 171.3 | 54 |
| 1986/4/8  | 23.3 | 8.3  | 0    | 3.5 | 277.8 | 67 |
| 1986/4/9  | 23.9 | 10.2 | 0    | 3.8 | 254.5 | 68 |
| 1986/4/10 | 18.9 | 12.6 | 0    | 5.3 | 97.8  | 52 |
| 1986/4/11 | 19.5 | 4.7  | 0    | 0.8 | 229.4 | 57 |
| 1986/4/12 | 21.2 | 9.5  | 0    | 3.8 | 185.2 | 55 |
| 1986/4/13 | 23.6 | 9.2  | 0    | 3.0 | 215.2 | 63 |
| 1986/4/14 | 24.4 | 13.9 | 0    | 3.5 | 271.1 | 52 |
| 1986/4/15 | 20.1 | 11.0 | 0    | 3.5 | 264.6 | 59 |
| 1986/4/16 | 23.3 | 9.3  | 0    | 4.8 | 197.5 | 67 |
| 1986/4/17 | 24.2 | 14.3 | 0    | 4.0 | 188.9 | 62 |
| 1986/4/18 | 26.3 | 12.0 | 0    | 5.0 | 271.5 | 69 |
| 1986/4/19 | 27.2 | 14.5 | 0    | 3.3 | 185.2 | 55 |
| 1986/4/20 | 18.5 | 6.9  | 0    | 3.3 | 253.5 | 34 |
| 1986/4/21 | 20.1 | 9.9  | 0.07 | 3.3 | 244.8 | 59 |
| 1986/4/22 | 23.3 | 4.9  | 0    | 1.8 | 299.3 | 46 |
| 1986/4/23 | 29.9 | 11.0 | 0    | 3.8 | 262.0 | 47 |
| 1986/4/24 | 23.6 | 13.2 | 0    | 4.3 | 200.7 | 54 |
| 1986/4/25 | 18.5 | 11.8 | 0    | 4.5 | 72.5  | 63 |
| 1986/4/26 | 13.2 | 10.1 | 0.3  | 1.3 | 20.7  | 84 |
| 1986/4/27 | 17.6 | 9.6  | 0    | 2.0 | 88.2  | 74 |
| 1986/4/28 | 20.0 | 8.6  | 0    | 0.3 | 117.0 | 68 |
| 1986/4/29 | 16.4 | 13.0 | 0.48 | 1.5 | 25.5  | 79 |
| 1986/4/30 | 14.9 | 11.2 | 0.21 | 2.0 | 65.2  | 80 |
| 1986/5/1  | 20.1 | 8.5  | 0.02 | 1.5 | 277.8 | 75 |
| 1986/5/2  | 23.2 | 9.3  | 0    | 2.0 | 295.5 | 70 |

|           |      |      |      |     |       |    |
|-----------|------|------|------|-----|-------|----|
| 1992/4/6  | 24.4 | 17.0 | 0.7  | 1.0 | 126.9 | 90 |
| 1992/4/7  | 22.5 | 16.4 | 0    | 2.8 | 203.5 | 81 |
| 1992/4/8  | 21.3 | 16.5 | 0.01 | 2.3 | 73.4  | 79 |
| 1992/4/9  | 19.4 | 16.4 | 1.7  | 1.8 | 77.0  | 95 |
| 1992/4/10 | 20.5 | 13.8 | 0.18 | 1.0 | 121.8 | 78 |
| 1992/4/11 | 20.7 | 12.8 | 0.73 | 1.5 | 36.9  | 81 |
| 1992/4/12 | 21.2 | 12.9 | 0    | 1.5 | 156.0 | 65 |
| 1992/4/13 | 23.2 | 12.5 | 0    | 0.5 | 190.2 | 63 |
| 1992/4/14 | 25.4 | 12.3 | 0    | 1.0 | 234.0 | 57 |
| 1992/4/15 | 24.2 | 13.8 | 0    | 0.3 | 201.6 | 65 |
| 1992/4/16 | 25.4 | 11.9 | 0    | 2.0 | 271.9 | 64 |
| 1992/4/17 | 29.5 | 15.1 | 0    | 2.0 | 240.2 | 58 |
| 1992/4/18 | 22.8 | 18.7 | 0.03 | 0.8 | 83.3  | 78 |
| 1992/4/19 | 27.0 | 16.6 | 0.01 | 1.0 | 115.3 | 79 |
| 1992/4/20 | 32.7 | 17.6 | 0    | 1.5 | 238.9 | 70 |
| 1992/4/21 | 29.1 | 18.6 | 1.34 | 2.8 | 104.9 | 77 |
| 1992/4/22 | 25.4 | 17.3 | 0.06 | 2.0 | 132.3 | 79 |
| 1992/4/23 | 25.8 | 18.6 | 0.11 | 1.8 | 244.2 | 72 |
| 1992/4/24 | 23.3 | 19.4 | 3.95 | 2.0 | 45.4  | 92 |
| 1992/4/25 | 20.7 | 14.2 | 1.23 | 4.5 | 45.6  | 87 |
| 1992/4/26 | 17.1 | 13.6 | 2.04 | 1.0 | 174.7 | 96 |
| 1992/4/27 | 22.5 | 15.7 | 1.96 | 0.8 | 117.6 | 95 |
| 1992/4/28 | 30.5 | 18.6 | 0.03 | 1.0 | 199.1 | 84 |
| 1992/4/29 | 32.3 | 19.5 | 1.56 | 3.8 | 152.7 | 78 |
| 1992/4/30 | 28.6 | 19.0 | 0.01 | 0.3 | 195.3 | 82 |
| 1992/5/1  | 26.0 | 19.5 | 3.3  | 1.8 | 149.2 | 86 |

|           |      |      |      |     |       |    |
|-----------|------|------|------|-----|-------|----|
| 1986/5/3  | 24.2 | 9.4  | 0    | 1.5 | 252.3 | 68 |
| 1986/5/4  | 25.0 | 11.6 | 0    | 2.5 | 301.7 | 65 |
| 1986/5/5  | 25.8 | 12.7 | 0    | 1.8 | 262.0 | 69 |
| 1986/5/6  | 32.9 | 13.2 | 0    | 2.0 | 316.8 | 57 |
| 1986/5/7  | 32.0 | 15.3 | 0    | 5.0 | 251.6 | 49 |
| 1986/5/8  | 36.1 | 18.8 | 0    | 5.3 | 275.7 | 53 |
| 1986/5/9  | 25.1 | 15.8 | 0    | 3.5 | 284.4 | 55 |
| 1986/5/10 | 23.9 | 13.6 | 0    | 3.3 | 193.4 | 60 |
| 1986/5/11 | 28.3 | 12.9 | 0    | 3.3 | 300.0 | 66 |
| 1986/5/12 | 24.6 | 18.1 | 0    | 2.0 | 111.0 | 77 |
| 1986/5/13 | 31.2 | 19.5 | 0    | 2.3 | 274.9 | 58 |
| 1986/5/14 | 30.9 | 13.5 | 0    | 2.0 | 314.6 | 37 |
| 1986/5/15 | 32.2 | 14.4 | 0    | 2.0 | 289.8 | 56 |
| 1986/5/16 | 35.2 | 20.9 | 0    | 3.3 | 316.8 | 45 |
| 1986/5/17 | 34.4 | 18.4 | 0.05 | 2.5 | 279.4 | 57 |
| 1986/5/18 | 25.6 | 14.6 | 4.01 | 5.0 | 17.9  | 96 |
| 1986/5/19 | 22.5 | 13.7 | 0.07 | 3.0 | 190.7 | 83 |
| 1986/5/20 | 23.4 | 16.0 | 0    | 1.8 | 109.8 | 84 |
| 1986/5/21 | 28.0 | 12.5 | 0    | 1.3 | 304.9 | 73 |
| 1986/5/22 | 28.1 | 13.4 | 0    | 3.8 | 301.5 | 61 |
| 1986/5/23 | 29.4 | 13.9 | 0    | 3.3 | 310.3 | 60 |
| 1986/5/24 | 27.2 | 16.9 | 0    | 4.5 | 191.6 | 67 |
| 1986/5/25 | 20.3 | 12.8 | 0.71 | 5.3 | 10.9  | 79 |
| 1986/5/26 | 22.7 | 12.0 | 0.63 | 1.3 | 269.3 | 86 |
| 1986/5/27 | 28.0 | 13.9 | 0    | 2.3 | 308.7 | 76 |
| 1986/5/28 | 29.9 | 17.9 | 0    | 3.8 | 319.7 | 68 |

|           |      |      |      |     |       |    |
|-----------|------|------|------|-----|-------|----|
| 1992/5/2  | 26.2 | 19.2 | 0.42 | 3.5 | 93.8  | 85 |
| 1992/5/3  | 24.5 | 18.1 | 0    | 5.0 | 139.5 | 76 |
| 1992/5/4  | 29.2 | 19.7 | 0.33 | 2.0 | 185.1 | 78 |
| 1992/5/5  | 33.5 | 22.4 | 0.09 | 1.3 | 210.8 | 70 |
| 1992/5/6  | 33.8 | 21.3 | 0.19 | 2.5 | 263.2 | 70 |
| 1992/5/7  | 25.0 | 20.4 | 4.25 | 1.3 | 127.0 | 92 |
| 1992/5/8  | 25.9 | 20.4 | 0    | 2.0 | 190.9 | 83 |
| 1992/5/9  | 22.7 | 17.2 | 0.03 | 5.0 | 158.2 | 73 |
| 1992/5/10 | 22.3 | 15.2 | 0    | 3.5 | 230.3 | 53 |
| 1992/5/11 | 26.3 | 15.6 | 0    | 3.5 | 306.4 | 53 |
| 1992/5/12 | 30.1 | 17.9 | 0    | 2.3 | 295.3 | 65 |
| 1992/5/13 | 28.4 | 18.5 | 0    | 2.3 | 216.8 | 79 |
| 1992/5/14 | 24.8 | 19.4 | 2.74 | 1.8 | 109.5 | 90 |
| 1992/5/15 | 26.1 | 19.4 | 0.22 | 1.3 | 235.2 | 87 |
| 1992/5/16 | 27.9 | 19.2 | 2.23 | 3.5 | 238.9 | 86 |
| 1992/5/17 | 23.1 | 16.8 | 4.76 | 2.0 | 78.2  | 98 |
| 1992/5/18 | 21.6 | 16.8 | 0.05 | 1.5 | 45.7  | 81 |
| 1992/5/19 | 20.0 | 16.8 | 0    | 1.3 | 54.6  | 81 |
| 1992/5/20 | 25.6 | 14.6 | 0    | 0.3 | 234.3 | 77 |
| 1992/5/21 | 23.7 | 18.4 | 0.12 | 1.5 | 84.7  | 80 |
| 1992/5/22 | 28.5 | 16.9 | 0    | 0.5 | 209.1 | 80 |
| 1992/5/23 | 31.0 | 19.7 | 0    | 1.3 | 289.4 | 71 |
| 1992/5/24 | 31.9 | 20.4 | 0    | 0.5 | 245.9 | 66 |
| 1992/5/25 | 28.6 | 20.6 | 0    | 1.0 | 70.1  | 69 |
| 1992/5/26 | 28.3 | 19.5 | 0.1  | 1.8 | 70.9  | 75 |
| 1992/5/27 | 30.1 | 19.5 | 0    | 1.5 | 272.0 | 63 |

|                  |             |             |          |            |              |           |
|------------------|-------------|-------------|----------|------------|--------------|-----------|
| 1986/5/29        | 31.1        | 15.4        | 1.18     | 0.8        | 328.7        | 77        |
| 1986/5/30        | 32.7        | 18.6        | 0        | 2.0        | 235.9        | 69        |
| 1986/5/31        | 34.3        | 19.3        | 0        | 0.8        | 266.7        | 64        |
| 1986/6/1         | 31.9        | 20.8        | 0        | 2.0        | 211.6        | 72        |
| 1986/6/2         | 37.7        | 21.7        | 0        | 1.0        | 312.7        | 61        |
| 1986/6/3         | 35.7        | 20.6        | 0        | 1.5        | 226.5        | 54        |
| 1986/6/4         | 35.6        | 22.7        | 0        | 2.0        | 167.0        | 57        |
| 1986/6/5         | 29.8        | 19.4        | 0.41     | 3.3        | 239.5        | 62        |
| 1986/6/6         | 32.0        | 17.4        | 0        | 0.8        | 301.9        | 60        |
| 1986/6/7         | 32.5        | 18.9        | 0        | 1.0        | 286.1        | 51        |
| 1986/6/8         | 32.0        | 19.6        | 0        | 2.8        | 267.1        | 46        |
| 1986/6/9         | 30.7        | 17.4        | 0        | 2.3        | 121.9        | 56        |
| 1986/6/10        | 31.3        | 20.1        | 0        | 1.5        | 304.5        | 60        |
| 1986/6/11        | 28.0        | 21.4        | 0.02     | 2.8        | 101.6        | 74        |
| 1986/6/12        | 22.5        | 16.7        | 0.32     | 5.3        | 156.5        | 85        |
| 1986/6/13        | 24.6        | 18.0        | 0        | 4.5        | 185.9        | 77        |
| 1986/6/14        | 23.0        | 16.5        | 0        | 2.3        | 175.0        | 84        |
| 1986/6/15        | 23.1        | 18.2        | 0        | 1.5        | 76.4         | 88        |
| 1986/6/16        | 30.9        | 17.3        | 0        | 1.8        | 300.5        | 77        |
| 1986/6/17        | 35.2        | 18.0        | 0        | 0.8        | 306.6        | 63        |
| 1986/6/18        | 36.7        | 20.0        | 0        | 2.3        | 282.4        | 54        |
| 1986/6/19        | 33.3        | 19.6        | 0        | 2.0        | 203.5        | 59        |
| 1986/6/20        | 32.8        | 22.2        | 0        | 1.3        | 208.2        | 63        |
| <b>1986/6/21</b> | <b>32.5</b> | <b>21.4</b> | <b>0</b> | <b>1.1</b> | <b>242.9</b> | <b>69</b> |
| <b>1986/6/22</b> | <b>33.5</b> | <b>20.0</b> | <b>0</b> | <b>1.6</b> | <b>299.0</b> | <b>66</b> |
| <b>1986/6/23</b> | <b>33.0</b> | <b>21.6</b> | <b>0</b> | <b>2.4</b> | <b>289.0</b> | <b>61</b> |

|           |      |      |      |     |       |    |
|-----------|------|------|------|-----|-------|----|
| 1992/5/28 | 31.8 | 18.3 | 0    | 1.0 | 294.6 | 56 |
| 1992/5/29 | 28.4 | 22.2 | 0.03 | 0.3 | 116.7 | 75 |
| 1992/5/30 | 22.7 | 19.5 | 2.82 | 2.8 | 46.8  | 94 |
| 1992/5/31 | 28.0 | 20.5 | 0    | 3.0 | 150.2 | 79 |
| 1992/6/1  | 30.2 | 21.8 | 0    | 2.8 | 143.1 | 75 |
| 1992/6/2  | 32.3 | 21.6 | 0    | 1.0 | 316.4 | 67 |
| 1992/6/3  | 33.3 | 23.6 | 0    | 1.3 | 260.4 | 67 |
| 1992/6/4  | 31.3 | 24.1 | 3.14 | 1.5 | 46.6  | 85 |
| 1992/6/5  | 33.9 | 23.8 | 0    | 1.0 | 255.6 | 76 |
| 1992/6/6  | 30.4 | 23.7 | 0.83 | 2.8 | 149.4 | 83 |
| 1992/6/7  | 30.0 | 20.7 | 0.74 | 0.8 | 123.5 | 69 |
| 1992/6/8  | 30.8 | 20.3 | 0    | 0.5 | 232.6 | 64 |
| 1992/6/9  | 33.4 | 19.2 | 0    | 1.0 | 232.5 | 53 |
| 1992/6/10 | 34.2 | 21.0 | 0    | 0.3 | 220.1 | 59 |
| 1992/6/11 | 34.6 | 23.0 | 0    | 1.0 | 213.8 | 60 |
| 1992/6/12 | 33.9 | 25.3 | 0    | 0.8 | 210.7 | 69 |
| 1992/6/13 | 34.6 | 25.5 | 0    | 2.3 | 209.2 | 62 |
| 1992/6/14 | 32.6 | 26.0 | 0.19 | 2.8 | 207.6 | 69 |
| 1992/6/15 | 27.1 | 23.0 | 4.7  | 1.3 | 71.1  | 96 |
| 1992/6/16 | 27.4 | 22.2 | 5.23 | 1.0 | 112.5 | 94 |
| 1992/6/17 | 24.5 | 22.0 | 0.49 | 1.5 | 121.5 | 96 |
| 1992/6/18 | 29.4 | 18.6 | 0    | 2.0 | 212.4 | 69 |
| 1992/6/19 | 28.3 | 23.0 | 0    | 2.3 | 103.9 | 75 |
| 1992/6/20 | 25.6 | 21.8 | 1.98 | 2.0 | 65.3  | 91 |
| 1992/6/21 | 30.7 | 21.5 | 0.11 | 2.3 | 217.8 | 86 |
| 1992/6/22 | 25.9 | 20.5 | 2.16 | 0.8 | 175.7 | 96 |

|                  |             |             |             |            |              |           |
|------------------|-------------|-------------|-------------|------------|--------------|-----------|
| <b>1986/6/24</b> | <b>32.0</b> | <b>18.9</b> | <b>0.07</b> | <b>1.3</b> | <b>302.0</b> | <b>66</b> |
| <b>1986/6/25</b> | <b>34.4</b> | <b>21.8</b> | <b>0</b>    | <b>1.9</b> | <b>278.5</b> | <b>65</b> |
| <b>1986/6/26</b> | <b>35.5</b> | <b>24.9</b> | <b>0</b>    | <b>3.0</b> | <b>152.3</b> | <b>62</b> |
| <b>1986/6/27</b> | <b>34.0</b> | <b>25.2</b> | <b>0.11</b> | <b>2.1</b> | <b>295.8</b> | <b>67</b> |
| <b>1986/6/28</b> | <b>37.6</b> | <b>23.3</b> | <b>0</b>    | <b>0.8</b> | <b>330.0</b> | <b>55</b> |
| <b>1986/6/29</b> | <b>36.2</b> | <b>25.8</b> | <b>0</b>    | <b>1.6</b> | <b>241.3</b> | <b>46</b> |
| <b>1986/6/30</b> | <b>34.8</b> | <b>26.2</b> | <b>0</b>    | <b>0.5</b> | <b>131.6</b> | <b>56</b> |
| 1986/7/1         | 32.1        | 26.0        | 0           | 1.8        | 57.8         | 58        |
| 1986/7/2         | 27.5        | 21.7        | 0.35        | 1.0        | 25.6         | 86        |
| 1986/7/3         | 23.4        | 20.1        | 0.48        | 2.0        | 34.8         | 92        |
| 1986/7/4         | 25.1        | 17.7        | 0.21        | 2.0        | 114.4        | 81        |
| 1986/7/5         | 29.4        | 17.3        | 0           | 2.0        | 264.6        | 78        |
| 1986/7/6         | 32.3        | 19.9        | 0           | 2.5        | 319.3        | 66        |
| 1986/7/7         | 32.7        | 20.9        | 0           | 2.3        | 307.9        | 71        |
| 1986/7/8         | 34.5        | 22.0        | 0           | 1.5        | 292.9        | 66        |
| 1986/7/9         | 33.4        | 23.5        | 0           | 2.5        | 148.4        | 66        |
| 1986/7/10        | 32.2        | 23.4        | 0.12        | 2.3        | 257.2        | 64        |
| 1986/7/11        | 34.0        | 18.9        | 0           | 1.5        | 300.3        | 66        |
| 1986/7/12        | 35.6        | 21.5        | 0           | 1.8        | 298.7        | 61        |
| 1986/7/13        | 36.2        | 21.0        | 0           | 1.8        | 235.8        | 66        |
| 1986/7/14        | 38.1        | 26.4        | 0           | 3.8        | 280.8        | 64        |
| 1986/7/15        | 32.3        | 28.2        | 0           | 3.3        | 79.9         | 76        |
| 1986/7/16        | 31.6        | 24.6        | 0           | 1.8        | 219.8        | 76        |
| 1986/7/17        | 31.9        | 23.0        | 0           | 3.8        | 214.2        | 77        |
| 1986/7/18        | 33.2        | 21.8        | 0           | 1.3        | 277.5        | 70        |
| 1986/7/19        | 29.1        | 23.6        | 0.02        | 3.3        | 93.3         | 85        |

|           |      |      |       |     |       |    |
|-----------|------|------|-------|-----|-------|----|
| 1992/6/23 | 26.5 | 19.0 | 2.15  | 1.0 | 69.0  | 88 |
| 1992/6/24 | 24.8 | 21.0 | 0.51  | 2.0 | 53.8  | 91 |
| 1992/6/25 | 23.0 | 21.1 | 7.42  | 1.8 | 102.3 | 98 |
| 1992/6/26 | 23.4 | 20.3 | 2.77  | 2.3 | 190.6 | 96 |
| 1992/6/27 | 26.8 | 20.3 | 0     | 3.5 | 182.1 | 80 |
| 1992/6/28 | 28.4 | 21.2 | 0     | 3.3 | 215.9 | 77 |
| 1992/6/29 | 31.9 | 21.5 | 0     | 0.8 | 236.9 | 73 |
| 1992/6/30 | 32.2 | 24.4 | 0.05  | 1.3 | 141.6 | 82 |
| 1992/7/1  | 29.7 | 24.9 | 0.24  | 1.3 | 172.0 | 89 |
| 1992/7/2  | 31.6 | 23.9 | 0.43  | 1.5 | 193.9 | 91 |
| 1992/7/3  | 27.5 | 22.6 | 0.36  | 2.3 | 191.7 | 92 |
| 1992/7/4  | 23.8 | 21.5 | 16.54 | 1.8 | 32.4  | 98 |
| 1992/7/5  | 23.5 | 21.0 | 11.04 | 2.8 | 12.6  | 97 |
| 1992/7/6  | 25.2 | 20.0 | 0.51  | 0.8 | 39.9  | 91 |
| 1992/7/7  | 29.5 | 20.3 | 0     | 0.8 | 64.8  | 80 |
| 1992/7/8  | 29.1 | 21.9 | 0     | 1.8 | 215.4 | 75 |
| 1992/7/9  | 30.7 | 21.5 | 0     | 1.3 | 152.9 | 78 |
| 1992/7/10 | 28.0 | 23.2 | 0.56  | 1.5 | 121.6 | 88 |
| 1992/7/11 | 27.5 | 22.6 | 7.44  | 1.0 | 266.8 | 98 |
| 1992/7/12 | 33.0 | 22.6 | 0     | 1.5 | 277.2 | 84 |
| 1992/7/13 | 34.0 | 24.8 | 0.01  | 0.8 | 286.9 | 74 |
| 1992/7/14 | 35.3 | 24.6 | 0     | 1.0 | 292.7 | 73 |
| 1992/7/15 | 34.4 | 24.5 | 0     | 1.0 | 283.4 | 75 |
| 1992/7/16 | 36.5 | 25.5 | 0     | 1.3 | 292.6 | 69 |
| 1992/7/17 | 36.9 | 25.9 | 0     | 1.0 | 290.4 | 64 |
| 1992/7/18 | 36.6 | 26.9 | 0     | 1.3 | 284.4 | 66 |

|           |      |      |      |     |       |    |
|-----------|------|------|------|-----|-------|----|
| 1986/7/20 | 29.4 | 22.6 | 0.1  | 1.8 | 190.3 | 77 |
| 1986/7/21 | 32.7 | 22.0 | 0    | 3.3 | 275.9 | 75 |
| 1986/7/22 | 35.4 | 22.2 | 0    | 3.3 | 251.7 | 72 |
| 1986/7/23 | 36.6 | 24.6 | 0    | 3.8 | 302.2 | 71 |
| 1986/7/24 | 32.4 | 25.2 | 0    | 4.8 | 153.7 | 78 |
| 1986/7/25 | 31.7 | 22.8 | 0    | 2.8 | 192.8 | 77 |
| 1986/7/26 | 31.6 | 22.2 | 0    | 1.3 | 207.8 | 77 |
| 1986/7/27 | 33.9 | 22.8 | 0    | 2.8 | 294.7 | 74 |
| 1986/7/28 | 35.3 | 25.5 | 0    | 2.8 | 234.5 | 74 |
| 1986/7/29 | 36.3 | 26.2 | 0    | 3.5 | 224.5 | 71 |
| 1986/7/30 | 32.0 | 23.1 | 1.37 | 1.3 | 146.6 | 88 |
| 1986/7/31 | 28.0 | 23.3 | 0.14 | 2.0 | 187.8 | 86 |
| 1986/8/1  | 30.8 | 20.4 | 0    | 2.0 | 302.8 | 73 |
| 1986/8/2  | 31.6 | 20.6 | 0    | 2.5 | 302.1 | 70 |
| 1986/8/3  | 30.5 | 21.9 | 0    | 0.8 | 271.2 | 76 |
| 1986/8/4  | 32.1 | 21.4 | 0    | 0.5 | 239.1 | 75 |
| 1986/8/5  | 27.6 | 21.7 | 0    | 3.3 | 126.2 | 80 |
| 1986/8/6  | 28.0 | 18.5 | 0.06 | 2.5 | 261.7 | 75 |
| 1986/8/7  | 32.1 | 18.8 | 0    | 0.0 | 286.3 | 69 |
| 1986/8/8  | 32.4 | 20.2 | 0    | 2.5 | 289.6 | 72 |
| 1986/8/9  | 33.1 | 22.2 | 0    | 2.5 | 247.1 | 78 |
| 1986/8/10 | 31.6 | 23.5 | 0    | 2.8 | 214.6 | 80 |
| 1986/8/11 | 34.9 | 23.4 | 0.23 | 2.8 | 269.7 | 78 |
| 1986/8/12 | 37.0 | 27.6 | 0    | 5.5 | 253.8 | 64 |
| 1986/8/13 | 35.5 | 24.5 | 0    | 2.0 | 267.8 | 64 |
| 1986/8/14 | 33.5 | 24.3 | 2.91 | 2.5 | 140.5 | 86 |

|                  |             |             |             |            |              |           |
|------------------|-------------|-------------|-------------|------------|--------------|-----------|
| 1992/7/19        | 33.0        | 26.5        | 0.01        | 2.3        | 297.5        | 77        |
| 1992/7/20        | 37.2        | 24.6        | 0           | 2.3        | 313.0        | 61        |
| 1992/7/21        | 38.1        | 25.9        | 0           | 0.8        | 310.9        | 60        |
| 1992/7/22        | 37.5        | 27.2        | 0           | 1.5        | 269.9        | 65        |
| 1992/7/23        | 37.0        | 25.5        | 0           | 1.3        | 320.9        | 57        |
| 1992/7/24        | 36.6        | 27.7        | 0           | 0.5        | 304.6        | 62        |
| 1992/7/25        | 37.8        | 27.5        | 0.4         | 1.0        | 312.5        | 66        |
| 1992/7/26        | 35.6        | 26.0        | 0           | 1.5        | 303.4        | 67        |
| 1992/7/27        | 37.3        | 26.0        | 0           | 0.8        | 292.0        | 64        |
| 1992/7/28        | 37.8        | 27.2        | 0           | 1.5        | 304.1        | 58        |
| <b>1992/7/29</b> | <b>39.0</b> | <b>27.6</b> | <b>0</b>    | <b>1.0</b> | <b>292.2</b> | <b>54</b> |
| <b>1992/7/30</b> | <b>39.4</b> | <b>28.1</b> | <b>0</b>    | <b>1.0</b> | <b>281.8</b> | <b>58</b> |
| <b>1992/7/31</b> | <b>39.3</b> | <b>25.7</b> | <b>0.01</b> | <b>1.0</b> | <b>188.2</b> | <b>62</b> |
| <b>1992/8/1</b>  | <b>38.0</b> | <b>25.2</b> | <b>0</b>    | <b>1.5</b> | <b>279.1</b> | <b>61</b> |
| <b>1992/8/2</b>  | <b>38.4</b> | <b>28.0</b> | <b>0</b>    | <b>1.8</b> | <b>287.2</b> | <b>63</b> |
| <b>1992/8/3</b>  | <b>38.1</b> | <b>26.9</b> | <b>0</b>    | <b>1.0</b> | <b>266.8</b> | <b>65</b> |
| <b>1992/8/4</b>  | <b>38.7</b> | <b>27.6</b> | <b>0</b>    | <b>1.8</b> | <b>243.5</b> | <b>61</b> |
| <b>1992/8/5</b>  | <b>37.4</b> | <b>26.2</b> | <b>0.44</b> | <b>1.5</b> | <b>257.5</b> | <b>70</b> |
| <b>1992/8/6</b>  | <b>36.8</b> | <b>25.6</b> | <b>0.91</b> | <b>1.0</b> | <b>269.7</b> | <b>74</b> |
| 1992/8/7         | 34.3        | 24.0        | 1.84        | 1.0        | 251.9        | 79        |
| 1992/8/8         | 34.0        | 23.9        | 1.57        | 1.5        | 236.5        | 88        |
| 1992/8/9         | 36.2        | 25.7        | 0           | 1.0        | 251.6        | 74        |
| 1992/8/10        | 35.6        | 26.9        | 0           | 0.5        | 285.8        | 71        |
| 1992/8/11        | 36.8        | 25.8        | 0           | 1.5        | 286.9        | 65        |
| 1992/8/12        | 37.4        | 28.0        | 0           | 1.8        | 274.4        | 60        |
| 1992/8/13        | 37.5        | 28.2        | 0           | 0.8        | 281.9        | 58        |

|           |      |      |      |     |       |    |
|-----------|------|------|------|-----|-------|----|
| 1986/8/15 | 24.8 | 19.4 | 2.36 | 3.8 | 84.0  | 89 |
| 1986/8/16 | 28.1 | 20.9 | 0    | 2.3 | 189.9 | 80 |
| 1986/8/17 | 30.1 | 20.5 | 0    | 0.5 | 168.3 | 81 |
| 1986/8/18 | 30.2 | 21.4 | 1.32 | 2.5 | 96.3  | 84 |
| 1986/8/19 | 24.8 | 20.9 | 0.36 | 1.5 | 85.9  | 92 |
| 1986/8/20 | 28.8 | 17.9 | 0    | 1.5 | 253.8 | 83 |
| 1986/8/21 | 28.5 | 19.2 | 0    | 1.5 | 212.2 | 77 |
| 1986/8/22 | 30.7 | 17.1 | 0    | 1.8 | 287.0 | 77 |
| 1986/8/23 | 30.3 | 16.7 | 0    | 2.5 | 257.8 | 72 |
| 1986/8/24 | 30.8 | 21.1 | 0    | 1.8 | 277.1 | 68 |
| 1986/8/25 | 30.3 | 21.4 | 0    | 1.0 | 248.1 | 76 |
| 1986/8/26 | 29.5 | 18.4 | 0    | 0.8 | 218.4 | 81 |
| 1986/8/27 | 30.5 | 21.9 | 0    | 1.8 | 255.7 | 65 |
| 1986/8/28 | 31.3 | 19.2 | 0    | 2.0 | 262.0 | 61 |
| 1986/8/29 | 32.0 | 16.7 | 0    | 1.5 | 246.2 | 72 |
| 1986/8/30 | 31.5 | 19.3 | 0    | 2.3 | 203.0 | 71 |
| 1986/8/31 | 33.4 | 19.2 | 0    | 2.0 | 195.1 | 70 |
| 1986/9/1  | 31.0 | 21.6 | 0.01 | 1.5 | 269.9 | 81 |
| 1986/9/2  | 31.3 | 18.7 | 0    | 2.3 | 285.9 | 71 |
| 1986/9/3  | 30.5 | 16.3 | 0    | 1.8 | 246.3 | 59 |
| 1986/9/4  | 28.2 | 16.7 | 0    | 1.3 | 200.3 | 78 |
| 1986/9/5  | 31.0 | 15.8 | 0    | 1.8 | 253.0 | 68 |
| 1986/9/6  | 28.3 | 18.6 | 0.05 | 1.5 | 101.6 | 83 |
| 1986/9/7  | 23.7 | 20.7 | 0.37 | 1.5 | 21.9  | 91 |
| 1986/9/8  | 25.9 | 19.2 | 0.96 | 1.3 | 33.7  | 93 |
| 1986/9/9  | 23.6 | 17.0 | 1.63 | 1.5 | 43.6  | 92 |

|           |      |      |      |     |       |    |
|-----------|------|------|------|-----|-------|----|
| 1992/8/14 | 33.5 | 26.0 | 1.03 | 1.5 | 251.9 | 72 |
| 1992/8/15 | 28.0 | 24.5 | 0.09 | 1.5 | 209.4 | 85 |
| 1992/8/16 | 31.8 | 22.1 | 0    | 1.8 | 96.8  | 74 |
| 1992/8/17 | 31.0 | 23.6 | 0    | 3.5 | 69.8  | 74 |
| 1992/8/18 | 33.3 | 24.4 | 0    | 2.0 | 105.0 | 72 |
| 1992/8/19 | 29.8 | 24.9 | 0.01 | 2.8 | 55.1  | 74 |
| 1992/8/20 | 33.8 | 23.2 | 0    | 2.0 | 243.3 | 64 |
| 1992/8/21 | 35.7 | 25.6 | 0    | 2.5 | 267.0 | 58 |
| 1992/8/22 | 35.7 | 24.0 | 1.8  | 1.3 | 278.8 | 72 |
| 1992/8/23 | 29.8 | 25.5 | 0.22 | 2.8 | 265.5 | 87 |
| 1992/8/24 | 26.8 | 23.6 | 0.25 | 2.0 | 228.0 | 93 |
| 1992/8/25 | 30.8 | 24.1 | 0.03 | 1.8 | 269.2 | 86 |
| 1992/8/26 | 33.2 | 24.6 | 0    | 1.8 | 245.0 | 79 |
| 1992/8/27 | 34.6 | 25.1 | 3.19 | 2.0 | 241.2 | 81 |
| 1992/8/28 | 34.6 | 25.5 | 0.01 | 2.3 | 200.0 | 74 |
| 1992/8/29 | 34.3 | 25.9 | 0    | 1.3 | 153.6 | 71 |
| 1992/8/30 | 33.3 | 26.8 | 0.01 | 3.5 | 107.2 | 68 |
| 1992/8/31 | 29.8 | 24.0 | 4.03 | 2.8 | 174.2 | 88 |
| 1992/9/1  | 28.7 | 22.9 | 3.22 | 2.8 | 207.7 | 92 |
| 1992/9/2  | 30.1 | 23.1 | 0    | 0.8 | 241.2 | 82 |
| 1992/9/3  | 31.2 | 22.0 | 0    | 0.5 | 246.9 | 83 |
| 1992/9/4  | 32.8 | 23.3 | 0    | 2.0 | 163.2 | 76 |
| 1992/9/5  | 31.0 | 25.6 | 0.19 | 2.0 | 84.1  | 78 |
| 1992/9/6  | 34.5 | 26.3 | 0    | 3.8 | 163.5 | 67 |
| 1992/9/7  | 34.2 | 25.7 | 0    | 2.3 | 194.0 | 70 |
| 1992/9/8  | 34.5 | 25.5 | 0    | 0.5 | 184.4 | 75 |

|           |      |      |      |     |       |    |
|-----------|------|------|------|-----|-------|----|
| 1986/9/10 | 21.5 | 15.4 | 0.11 | 1.8 | 67.6  | 93 |
| 1986/9/11 | 25.4 | 14.8 | 0    | 1.8 | 174.1 | 88 |
| 1986/9/12 | 25.5 | 17.5 | 0    | 2.3 | 123.4 | 86 |
| 1986/9/13 | 26.0 | 16.6 | 0    | 1.8 | 195.7 | 70 |
| 1986/9/14 | 28.7 | 16.9 | 0    | 1.5 | 203.7 | 75 |
| 1986/9/15 | 28.3 | 19.0 | 0    | 2.3 | 155.8 | 79 |
| 1986/9/16 | 27.2 | 18.6 | 0    | 2.5 | 241.4 | 64 |
| 1986/9/17 | 25.1 | 11.0 | 0    | 2.5 | 174.1 | 61 |
| 1986/9/18 | 28.0 | 12.8 | 0    | 0.5 | 208.2 | 69 |
| 1986/9/19 | 29.8 | 13.8 | 0    | 1.5 | 239.4 | 68 |
| 1986/9/20 | 24.7 | 14.1 | 0    | 2.3 | 219.7 | 66 |
| 1986/9/21 | 27.8 | 10.8 | 0    | 1.3 | 241.7 | 66 |
| 1986/9/22 | 32.1 | 11.5 | 0    | 2.3 | 250.6 | 59 |
| 1986/9/23 | 29.9 | 13.9 | 0    | 2.5 | 233.3 | 51 |
| 1986/9/24 | 30.4 | 15.2 | 0    | 0.8 | 217.7 | 63 |
| 1986/9/25 | 29.7 | 16.1 | 0    | 1.0 | 115.5 | 71 |
| 1986/9/26 | 29.2 | 15.4 | 0    | 1.0 | 187.5 | 77 |
| 1986/9/27 | 20.9 | 14.4 | 0.81 | 4.0 | 60.8  | 80 |
| 1986/9/28 | 15.8 | 12.1 | 1.06 | 1.5 | 25.2  | 84 |
| 1986/9/29 | 19.0 | 10.9 | 0    | 0.8 | 122.6 | 81 |
| 1986/9/30 | 25.6 | 7.6  | 0    | 0.5 | 224.8 | 77 |
| 1986/10/1 | 26.5 | 8.5  | 0    | 1.0 | 220.8 | 70 |
| 1986/10/2 | 26.2 | 7.6  | 0    | 0.3 | 215.4 | 70 |
| 1986/10/3 | 25.9 | 11.0 | 0    | 0.8 | 164.2 | 67 |
| 1986/10/4 | 26.0 | 11.5 | 0    | 1.3 | 196.2 | 66 |
| 1986/10/5 | 26.4 | 11.1 | 0    | 1.5 | 183.2 | 67 |

|           |      |      |      |     |       |    |
|-----------|------|------|------|-----|-------|----|
| 1992/9/9  | 28.5 | 21.6 | 0.27 | 2.3 | 179.5 | 92 |
| 1992/9/10 | 28.6 | 21.0 | 0    | 2.3 | 174.7 | 78 |
| 1992/9/11 | 31.3 | 22.2 | 0    | 1.3 | 189.1 | 75 |
| 1992/9/12 | 36.2 | 24.0 | 0    | 2.3 | 215.3 | 68 |
| 1992/9/13 | 35.1 | 27.0 | 0    | 1.0 | 240.9 | 73 |
| 1992/9/14 | 34.1 | 24.6 | 0    | 1.8 | 203.9 | 77 |
| 1992/9/15 | 33.2 | 23.2 | 2.47 | 2.5 | 138.7 | 88 |
| 1992/9/16 | 27.9 | 23.1 | 0    | 1.5 | 197.0 | 92 |
| 1992/9/17 | 23.6 | 20.2 | 0.02 | 1.3 | 149.0 | 95 |
| 1992/9/18 | 27.7 | 22.2 | 0    | 2.0 | 229.6 | 86 |
| 1992/9/19 | 30.9 | 22.7 | 0    | 2.5 | 231.7 | 77 |
| 1992/9/20 | 31.1 | 22.8 | 0    | 4.3 | 235.5 | 68 |
| 1992/9/21 | 30.6 | 23.3 | 0    | 3.8 | 165.0 | 66 |
| 1992/9/22 | 27.3 | 22.7 | 0    | 2.0 | 67.4  | 71 |
| 1992/9/23 | 25.7 | 22.1 | 0.02 | 3.0 | 80.2  | 81 |
| 1992/9/24 | 30.8 | 22.9 | 0    | 1.8 | 191.2 | 77 |
| 1992/9/25 | 30.3 | 20.9 | 0    | 1.8 | 220.0 | 68 |
| 1992/9/26 | 26.3 | 20.0 | 0    | 4.5 | 219.9 | 53 |
| 1992/9/27 | 26.3 | 17.2 | 0    | 4.0 | 249.9 | 55 |
| 1992/9/28 | 26.0 | 17.5 | 0    | 1.0 | 238.1 | 79 |
| 1992/9/29 | 26.2 | 15.4 | 0    | 0.3 | 175.6 | 78 |
| 1992/9/30 | 28.0 | 18.7 | 0    | 0.8 | 34.8  | 76 |
| 1992/10/1 | 32.4 | 21.1 | 0    | 0.8 | 192.2 | 77 |
| 1992/10/2 | 35.6 | 24.0 | 0    | 1.3 | 203.6 | 68 |
| 1992/10/3 | 35.4 | 24.0 | 0    | 1.0 | 214.9 | 69 |
| 1992/10/4 | 29.3 | 14.7 | 0.17 | 3.0 | 203.0 | 93 |

|            |      |      |      |     |       |    |
|------------|------|------|------|-----|-------|----|
| 1986/10/6  | 25.9 | 10.5 | 0    | 2.3 | 187.5 | 68 |
| 1986/10/7  | 23.7 | 10.6 | 0    | 2.0 | 115.4 | 74 |
| 1986/10/8  | 25.9 | 11.0 | 0.01 | 1.5 | 215.0 | 68 |
| 1986/10/9  | 21.5 | 8.0  | 0    | 3.3 | 219.4 | 50 |
| 1986/10/10 | 20.2 | 5.2  | 0    | 1.0 | 212.3 | 59 |
| 1986/10/11 | 22.5 | 4.4  | 0    | 1.0 | 206.2 | 66 |
| 1986/10/12 | 22.8 | 5.5  | 0    | 1.3 | 183.1 | 63 |
| 1986/10/13 | 26.1 | 8.3  | 0    | 2.5 | 187.3 | 60 |
| 1986/10/14 | 23.5 | 11.4 | 0    | 2.3 | 190.4 | 54 |
| 1986/10/15 | 25.0 | 7.2  | 0    | 1.8 | 182.9 | 58 |
| 1986/10/16 | 18.7 | 11.6 | 0    | 5.0 | 40.9  | 69 |
| 1986/10/17 | 14.2 | 7.9  | 3.74 | 5.8 | 0.0   | 93 |
| 1986/10/18 | 12.0 | 7.6  | 0.13 | 2.3 | 35.0  | 80 |
| 1986/10/19 | 11.5 | 8.5  | 0.37 | 2.0 | 19.0  | 87 |
| 1986/10/20 | 10.9 | 7.6  | 2.52 | 1.3 | 19.7  | 97 |
| 1986/10/21 | 14.2 | 7.9  | 0.15 | 0.8 | 136.3 | 93 |
| 1986/10/22 | 13.7 | 6.6  | 0    | 1.3 | 112.6 | 84 |
| 1986/10/23 | 15.3 | 7.5  | 0    | 3.0 | 113.8 | 86 |
| 1986/10/24 | 20.9 | 6.2  | 0    | 3.3 | 180.3 | 86 |
| 1986/10/25 | 20.4 | 9.2  | 0    | 2.5 | 162.3 | 85 |
| 1986/10/26 | 19.8 | 10.0 | 0    | 1.3 | 160.4 | 70 |
| 1986/10/27 | 21.4 | 7.4  | 0    | 3.3 | 123.3 | 70 |
| 1986/10/28 | 10.2 | 5.0  | 0.01 | 3.5 | 126.9 | 49 |
| 1986/10/29 | 13.1 | -0.2 | 0    | 2.8 | 195.6 | 49 |
| 1986/10/30 | 16.2 | 0.5  | 0    | 3.0 | 173.7 | 58 |
| 1986/10/31 | 21.3 | 4.3  | 0    | 2.5 | 167.0 | 66 |

|            |      |      |      |     |       |    |
|------------|------|------|------|-----|-------|----|
| 1992/10/5  | 21.3 | 14.7 | 0.14 | 2.0 | 61.8  | 81 |
| 1992/10/6  | 20.3 | 15.1 | 0    | 2.0 | 225.2 | 62 |
| 1992/10/7  | 19.3 | 14.5 | 0    | 1.8 | 208.0 | 77 |
| 1992/10/8  | 22.9 | 16.3 | 0    | 1.0 | 141.0 | 73 |
| 1992/10/9  | 24.3 | 14.0 | 0    | 2.5 | 154.6 | 64 |
| 1992/10/10 | 20.6 | 14.8 | 0.14 | 1.0 | 106.0 | 81 |
| 1992/10/11 | 21.8 | 16.0 | 0.05 | 0.5 | 171.5 | 86 |
| 1992/10/12 | 24.2 | 15.3 | 0    | 3.0 | 108.3 | 70 |
| 1992/10/13 | 20.4 | 16.8 | 0    | 2.3 | 31.4  | 65 |
| 1992/10/14 | 23.4 | 14.6 | 0    | 1.5 | 107.2 | 58 |
| 1992/10/15 | 22.2 | 14.7 | 0    | 2.0 | 179.4 | 62 |
| 1992/10/16 | 24.7 | 14.6 | 0    | 0.8 | 197.8 | 63 |
| 1992/10/17 | 24.6 | 11.5 | 0    | 0.5 | 192.2 | 60 |
| 1992/10/18 | 24.0 | 12.8 | 0    | 1.3 | 144.1 | 47 |
| 1992/10/19 | 23.8 | 10.5 | 0    | 1.5 | 211.1 | 51 |
| 1992/10/20 | 24.5 | 11.6 | 0    | 2.8 | 178.8 | 47 |
| 1992/10/21 | 24.6 | 15.3 | 0    | 3.8 | 197.2 | 49 |
| 1992/10/22 | 24.2 | 14.8 | 0    | 1.0 | 196.2 | 56 |
| 1992/10/23 | 22.4 | 15.0 | 0.07 | 1.0 | 128.5 | 71 |
| 1992/10/24 | 21.6 | 10.6 | 0    | 1.0 | 171.9 | 51 |
| 1992/10/25 | 21.4 | 9.4  | 0    | 1.0 | 199.9 | 47 |
| 1992/10/26 | 22.2 | 12.0 | 0    | 3.0 | 195.9 | 41 |
| 1992/10/27 | 22.7 | 13.1 | 0    | 3.8 | 199.8 | 48 |
| 1992/10/28 | 23.8 | 11.5 | 0    | 1.5 | 182.9 | 59 |
| 1992/10/29 | 26.2 | 11.7 | 0    | 0.8 | 183.9 | 62 |
| 1992/10/30 | 26.6 | 10.7 | 0    | 0.3 | 175.8 | 58 |

|            |      |      |      |     |       |    |
|------------|------|------|------|-----|-------|----|
| 1986/11/1  | 16.0 | 6.1  | 0    | 2.5 | 155.8 | 63 |
| 1986/11/2  | 21.2 | 5.5  | 0    | 2.0 | 129.5 | 68 |
| 1986/11/3  | 15.2 | 4.4  | 0    | 1.5 | 177.9 | 53 |
| 1986/11/4  | 19.8 | 1.9  | 0    | 2.8 | 162.4 | 68 |
| 1986/11/5  | 19.3 | 2.2  | 0    | 1.8 | 132.6 | 78 |
| 1986/11/6  | 15.3 | 8.2  | 0    | 1.3 | 101.2 | 76 |
| 1986/11/7  | 12.5 | 5.7  | 0    | 2.8 | 75.7  | 63 |
| 1986/11/8  | 14.2 | 4.2  | 0    | 3.8 | 169.4 | 48 |
| 1986/11/9  | 18.7 | -1.5 | 0    | 1.3 | 179.5 | 60 |
| 1986/11/10 | 17.2 | -0.9 | 0    | 1.0 | 136.5 | 55 |
| 1986/11/11 | 12.0 | 7.5  | 0    | 1.0 | 38.0  | 63 |
| 1986/11/12 | 16.0 | 2.8  | 0    | 1.8 | 114.7 | 78 |
| 1986/11/13 | 18.3 | 3.7  | 0    | 2.5 | 146.4 | 87 |
| 1986/11/14 | 11.9 | 4.5  | 0    | 7.0 | 25.2  | 41 |
| 1986/11/15 | 8.6  | 0.9  | 0    | 2.3 | 117.8 | 37 |
| 1986/11/16 | 8.5  | 0.2  | 0    | 1.5 | 57.2  | 55 |
| 1986/11/17 | 13.1 | 4.3  | 0    | 0.3 | 80.8  | 68 |
| 1986/11/18 | 13.1 | 0.7  | 0    | 0.8 | 75.5  | 72 |
| 1986/11/19 | 10.3 | 3.9  | 0.11 | 0.5 | 44.3  | 85 |
| 1986/11/20 | 12.5 | -2.2 | 0    | 1.5 | 110.9 | 89 |
| 1986/11/21 | 9.8  | 4.2  | 0    | 1.8 | 19.9  | 90 |
| 1986/11/22 | 8.4  | 5.4  | 0.11 | 4.3 | 2.5   | 95 |
| 1986/11/23 | 6.3  | 3.3  | 0.03 | 3.5 | 16.0  | 95 |
| 1986/11/24 | 5.2  | 3.4  | 0    | 3.5 | 22.7  | 80 |
| 1986/11/25 | 4.5  | -1.7 | 0    | 2.3 | 59.6  | 54 |
| 1986/11/26 | 4.3  | 0.0  | 0    | 0.3 | 31.1  | 51 |

|            |      |      |      |     |       |    |
|------------|------|------|------|-----|-------|----|
| 1992/10/31 | 27.8 | 10.4 | 0    | 0.0 | 185.3 | 56 |
| 1992/11/1  | 25.7 | 12.8 | 0    | 3.8 | 172.6 | 39 |
| 1992/11/2  | 23.5 | 13.5 | 0    | 2.8 | 174.2 | 50 |
| 1992/11/3  | 24.7 | 13.0 | 0    | 1.3 | 170.0 | 62 |
| 1992/11/4  | 17.8 | 12.9 | 0.01 | 0.3 | 118.3 | 68 |
| 1992/11/5  | 23.1 | 13.9 | 0    | 0.0 | 157.2 | 72 |
| 1992/11/6  | 24.1 | 13.9 | 0    | 2.5 | 156.9 | 71 |
| 1992/11/7  | 24.8 | 15.5 | 0    | 3.3 | 156.5 | 65 |
| 1992/11/8  | 21.2 | 9.2  | 2.28 | 2.3 | 0.0   | 88 |
| 1992/11/9  | 11.5 | 5.6  | 0.03 | 2.0 | 97.5  | 62 |
| 1992/11/10 | 13.7 | 2.3  | 0    | 0.3 | 194.9 | 61 |
| 1992/11/11 | 15.8 | 2.7  | 0    | 0.0 | 173.4 | 66 |
| 1992/11/12 | 19.2 | 5.7  | 0    | 0.5 | 161.6 | 68 |
| 1992/11/13 | 21.2 | 5.9  | 0    | 0.5 | 106.2 | 63 |
| 1992/11/14 | 20.0 | 11.9 | 0    | 1.0 | 112.8 | 63 |
| 1992/11/15 | 22.3 | 9.6  | 0    | 0.8 | 62.3  | 63 |
| 1992/11/16 | 16.1 | 11.2 | 0.14 | 3.3 | 59.6  | 77 |
| 1992/11/17 | 18.8 | 9.5  | 0    | 2.0 | 127.9 | 79 |
| 1992/11/18 | 25.9 | 13.8 | 0    | 2.8 | 122.0 | 67 |
| 1992/11/19 | 24.3 | 11.7 | 0.72 | 2.3 | 134.3 | 85 |
| 1992/11/20 | 13.2 | 8.0  | 0.2  | 3.0 | 140.5 | 57 |
| 1992/11/21 | 12.8 | 2.3  | 0    | 0.0 | 143.5 | 65 |
| 1992/11/22 | 14.6 | 3.4  | 0    | 0.3 | 145.1 | 73 |
| 1992/11/23 | 19.0 | 4.0  | 0    | 0.5 | 145.8 | 69 |
| 1992/11/24 | 19.8 | 5.7  | 0    | 0.0 | 146.2 | 70 |
| 1992/11/25 | 20.8 | 7.1  | 0    | 0.3 | 146.6 | 64 |

|            |      |      |      |     |       |    |
|------------|------|------|------|-----|-------|----|
| 1986/11/27 | 6.3  | -3.0 | 0    | 3.3 | 98.0  | 54 |
| 1986/11/28 | 4.2  | -0.1 | 0    | 3.3 | 49.0  | 59 |
| 1986/11/29 | 3.4  | -6.5 | 0    | 2.0 | 93.9  | 54 |
| 1986/11/30 | 11.1 | -6.2 | 0    | 3.0 | 141.9 | 52 |
| 1986/12/1  | 9.5  | -3.5 | 0    | 1.5 | 90.5  | 70 |
| 1986/12/2  | 10.8 | 4.0  | 0    | 3.3 | 113.0 | 64 |
| 1986/12/3  | 11.5 | 1.5  | 0    | 6.8 | 133.8 | 35 |
| 1986/12/4  | 14.1 | -4.0 | 0    | 2.8 | 133.9 | 52 |
| 1986/12/5  | 13.0 | -1.4 | 0    | 2.5 | 112.7 | 57 |
| 1986/12/6  | 9.4  | 0.4  | 0    | 2.0 | 136.2 | 46 |
| 1986/12/7  | 8.2  | -5.2 | 0    | 1.0 | 134.6 | 50 |
| 1986/12/8  | 3.6  | -2.5 | 0    | 2.5 | 19.3  | 46 |
| 1986/12/9  | 12.8 | -1.6 | 0    | 3.3 | 101.0 | 49 |
| 1986/12/10 | 14.4 | -3.7 | 0    | 3.3 | 116.4 | 55 |
| 1986/12/11 | 14.7 | 0.8  | 0    | 3.5 | 114.6 | 56 |
| 1986/12/12 | 9.2  | 3.6  | 0    | 3.3 | 10.5  | 67 |
| 1986/12/13 | 6.0  | 3.5  | 0.75 | 4.0 | 13.7  | 87 |
| 1986/12/14 | 6.1  | 2.2  | 0    | 5.5 | 43.3  | 69 |
| 1986/12/15 | 2.7  | -1.1 | 0    | 3.0 | 17.4  | 54 |
| 1986/12/16 | 1.2  | -2.4 | 0.26 | 3.3 | 28.1  | 84 |
| 1986/12/17 | 0.0  | -1.7 | 0.74 | 0.8 | 31.1  | 99 |
| 1986/12/18 | 3.2  | -9.4 | 0    | 1.3 | 131.0 | 74 |
| 1986/12/19 | 1.8  | -6.0 | 0    | 2.0 | 127.3 | 59 |
| 1986/12/20 | 0.7  | -5.3 | 0    | 3.5 | 70.1  | 79 |
| 1986/12/21 | 2.7  | -5.0 | 0    | 2.0 | 104.3 | 78 |
| 1986/12/22 | 2.7  | -6.2 | 0    | 2.0 | 76.2  | 83 |

|            |      |      |      |     |       |    |
|------------|------|------|------|-----|-------|----|
| 1992/11/26 | 16.5 | 7.9  | 0    | 4.3 | 145.9 | 45 |
| 1992/11/27 | 14.5 | 6.8  | 0    | 4.5 | 160.4 | 52 |
| 1992/11/28 | 16.5 | 6.9  | 0    | 1.3 | 161.8 | 60 |
| 1992/11/29 | 17.8 | 4.8  | 0    | 1.0 | 135.9 | 70 |
| 1992/11/30 | 16.2 | 10.5 | 0    | 1.0 | 78.2  | 73 |
| 1992/12/1  | 18.6 | 10.0 | 0    | 1.0 | 137.6 | 70 |
| 1992/12/2  | 17.1 | 10.4 | 0    | 3.8 | 139.5 | 55 |
| 1992/12/3  | 15.0 | 8.2  | 0    | 3.5 | 107.1 | 62 |
| 1992/12/4  | 16.4 | 9.5  | 0    | 3.5 | 137.4 | 57 |
| 1992/12/5  | 22.5 | 11.0 | 0    | 1.0 | 144.6 | 66 |
| 1992/12/6  | 23.7 | 11.1 | 0.03 | 1.3 | 141.3 | 79 |
| 1992/12/7  | 15.5 | 12.6 | 1.78 | 1.8 | 108.1 | 92 |
| 1992/12/8  | 16.7 | 8.5  | 0    | 1.0 | 91.6  | 88 |
| 1992/12/9  | 15.3 | 11.8 | 0.04 | 1.3 | 103.7 | 85 |
| 1992/12/10 | 16.7 | 9.0  | 0    | 1.0 | 102.9 | 79 |
| 1992/12/11 | 13.2 | 4.3  | 0    | 0.3 | 102.0 | 68 |
| 1992/12/12 | 12.5 | 7.7  | 0.39 | 1.0 | 34.8  | 89 |
| 1992/12/13 | 17.4 | 8.4  | 0.1  | 3.5 | 70.6  | 84 |
| 1992/12/14 | 12.5 | 5.6  | 1.95 | 4.8 | 10.2  | 87 |
| 1992/12/15 | 8.0  | 5.6  | 0    | 0.8 | 15.6  | 79 |
| 1992/12/16 | 11.5 | 2.2  | 0    | 0.8 | 99.5  | 83 |
| 1992/12/17 | 13.1 | 2.3  | 0    | 0.8 | 151.3 | 84 |
| 1992/12/18 | 16.7 | 4.3  | 0    | 0.8 | 117.8 | 79 |
| 1992/12/19 | 20.7 | 7.6  | 0    | 1.0 | 113.0 | 77 |
| 1992/12/20 | 20.7 | 11.0 | 0    | 0.3 | 108.0 | 82 |
| 1992/12/21 | 16.7 | 10.8 | 0.12 | 1.5 | 69.7  | 81 |

|            |     |      |      |     |       |    |  |            |      |      |      |     |       |    |
|------------|-----|------|------|-----|-------|----|--|------------|------|------|------|-----|-------|----|
| 1986/12/23 | 7.8 | -2.2 | 0    | 3.0 | 109.0 | 85 |  | 1992/12/22 | 13.5 | 8.4  | 0.07 | 1.8 | 87.4  | 84 |
| 1986/12/24 | 8.5 | -3.5 | 0    | 2.0 | 108.2 | 79 |  | 1992/12/23 | 9.0  | 3.3  | 0.58 | 1.5 | 60.8  | 75 |
| 1986/12/25 | 8.9 | -2.3 | 0    | 3.0 | 109.4 | 63 |  | 1992/12/24 | 9.9  | -0.2 | 0    | 0.5 | 105.8 | 66 |
| 1986/12/26 | 0.0 | -3.7 | 0.1  | 3.0 | 26.4  | 72 |  | 1992/12/25 | 9.8  | 6.2  | 0.03 | 2.0 | 75.6  | 64 |
| 1986/12/27 | 3.9 | -2.8 | 0.04 | 2.0 | 75.0  | 90 |  | 1992/12/26 | 11.8 | 7.4  | 0.9  | 2.0 | 2.7   | 91 |
| 1986/12/28 | 0.0 | -8.0 | 0.01 | 2.3 | 36.9  | 86 |  | 1992/12/27 | 11.6 | 10.4 | 0.66 | 1.0 | 3.8   | 97 |
| 1986/12/29 | 0.6 | -3.3 | 0    | 1.0 | 54.7  | 96 |  | 1992/12/28 | 13.7 | 8.3  | 0    | 1.8 | 45.1  | 82 |
| 1986/12/30 | 0.5 | -2.6 | 0    | 2.0 | 23.3  | 95 |  | 1992/12/29 | 10.7 | 4.8  | 0    | 1.5 | 65.7  | 78 |
| 1986/12/31 | 1.0 | -3.1 | 0    | 5.0 | 78.9  | 77 |  | 1992/12/30 | 11.4 | 6.0  | 0.29 | 2.3 | 76.0  | 88 |
|            |     |      |      |     |       |    |  | 1992/12/31 | 10.0 | 7.1  | 0.12 | 1.3 | 86.3  | 93 |

# SZ

| Date      | $T_{\max}$ | $T_{\min}$ | $P$  | $W^*$ | $W^\#$ | $R_{\max}$ | $M$  | RH |
|-----------|------------|------------|------|-------|--------|------------|------|----|
| 2010/1/1  | 19.1       | 14.2       | 0    | 2.4   |        | 308        | 1252 | 65 |
| 2010/1/2  | 20.0       | 15.5       | 0.28 | 2.2   |        | 55         | 928  | 84 |
| 2010/1/3  | 18.9       | 15.0       | 0.88 | 1.6   |        | 834        | 1135 | 82 |
| 2010/1/4  | 22.8       | 15.0       | 0    | 2.3   |        | 656        | 1243 | 69 |
| 2010/1/5  | 18.7       | 16.8       | 0    | 3.8   |        | 391        | 1117 | 71 |
| 2010/1/6  | 17.4       | 12.6       | 0.15 | 3.2   |        | 114        | 1120 | 81 |
| 2010/1/7  | 12.6       | 9.6        | 0.06 | 2.9   |        | 144        | 1137 | 78 |
| 2010/1/8  | 13.5       | 9.0        | 0.08 | 2.2   |        | 223        | 1243 | 78 |
| 2010/1/9  | 18.7       | 10.5       | 0    | 2.3   |        | 680        | 1402 | 73 |
| 2010/1/10 | 21.3       | 14.8       | 0    | 2.5   |        | 412        | 1322 | 72 |
| 2010/1/11 | 18.4       | 11.8       | 1.25 | 2.0   |        | 276        | 1209 | 86 |
| 2010/1/12 | 13.8       | 8.2        | 0    | 3.8   |        | 613        | 1202 | 61 |
| 2010/1/13 | 16.2       | 7.9        | 0    | 2.8   |        | 794        | 1325 | 37 |
| 2010/1/14 | 17.9       | 11.4       | 0    | 2.6   |        | 653        | 1204 | 46 |

|           |      |      |      |     |                  |                   |    |
|-----------|------|------|------|-----|------------------|-------------------|----|
| 2010/1/15 | 21.8 | 12.0 | 0    | 2.7 | 747              | 1214              | 55 |
| 2010/1/16 | 22.7 | 13.8 | 0    | 1.4 | 805              | 1158              | 57 |
| 2010/1/17 | 22.1 | 13.4 | 0    | 1.8 | 640              | 1134              | 65 |
| 2010/1/18 | 22.1 | 13.6 | 0    | 2.1 | 593              | 1216              | 72 |
| 2010/1/19 | 22.2 | 14.8 | 0    | 2.6 | 683              | 1154              | 75 |
| 2010/1/20 | 24.7 | 19.7 | 0    | 2.2 | 291              | 1224              | 76 |
| 2010/1/21 | 25.0 | 21.4 | 0    | 1.7 | 218              | 1451              | 78 |
| 2010/1/22 | 22.9 | 16.5 | 0    | 2.3 | 67               | 1540              | 79 |
| 2010/1/23 | 16.6 | 11.8 | 0.01 | 2.5 | 113              | 1344              | 79 |
| 2010/1/24 | 15.4 | 10.8 | 0    | 1.6 | 193              | 1111              | 77 |
| 2010/1/25 | 20.4 | 14.1 | 0    | 1.5 | 553              | 1240              | 74 |
| 2010/1/26 | 17.9 | 13.3 | 0    | 2.1 | 660              | 1439              | 72 |
| 2010/1/27 | 19.4 | 15.3 | 0    | 1.8 | 242              | 1108              | 77 |
| 2010/1/28 | 23.4 | 17.6 | 0    | 1.0 | 668              | 1339              | 82 |
| 2010/1/29 | 20.0 | 17.6 | 0.07 | 2.5 | 482              | 1447              | 81 |
| 2010/1/30 | 23.5 | 17.1 | 0    | 2.7 | 791              | 1153              | 73 |
| 2010/1/31 | 27.0 | 19.0 | 0    | 2.3 | 779              | 1303              | 74 |
| 2010/2/1  | 25.7 | 19.0 | 0    | 1.9 | 665              | 1125              | 79 |
| 2010/2/2  | 21.0 | 18.4 | 0    | 2.5 | 617              | 1025              | 81 |
| 2010/2/3  | 22.4 | 17.9 | 0    | 2.7 | 138              | 1055              | 81 |
| 2010/2/4  | 20.5 | 16.9 | 0    | 2.8 | 152 <sup>@</sup> | 1200 <sup>@</sup> | 82 |
| 2010/2/5  | 21.5 | 17.0 | 0    | 3.2 | 166              | 1218              | 79 |
| 2010/2/6  | 20.3 | 17.4 | 0    | 3.1 | 536              | 1155              | 82 |
| 2010/2/7  | 18.6 | 16.8 | 6.54 | 2.6 | 111              | 1250              | 90 |
| 2010/2/8  | 20.9 | 17.3 | 2.03 | 2.7 | 833              | 1040              | 90 |
| 2010/2/9  | 27.3 | 18.9 | 0    | 2.4 | 680              | 1057              | 84 |

|           |      |      |      |     |     |      |    |
|-----------|------|------|------|-----|-----|------|----|
| 2010/2/10 | 27.7 | 21.8 | 0    | 1.9 | 788 | 1246 | 80 |
| 2010/2/11 | 26.0 | 23.2 | 0    | 2.5 | 898 | 1216 | 80 |
| 2010/2/12 | 24.1 | 10.3 | 0    | 3.7 | 235 | 1010 | 68 |
| 2010/2/13 | 12.5 | 7.4  | 0    | 2.8 | 137 | 1123 | 83 |
| 2010/2/14 | 15.8 | 11.8 | 0.17 | 1.9 | 304 | 1125 | 92 |
| 2010/2/15 | 12.7 | 8.4  | 0.15 | 2.3 | 208 | 1129 | 90 |
| 2010/2/16 | 8.6  | 6.6  | 0.09 | 3.0 | 219 | 1211 | 82 |
| 2010/2/17 | 8.4  | 6.6  | 0.2  | 3.5 | 262 | 1239 | 84 |
| 2010/2/18 | 9.0  | 6.7  | 0.06 | 3.1 | 337 | 1101 | 68 |
| 2010/2/19 | 9.3  | 5.9  | 0.55 | 2.0 | 818 | 1119 | 84 |
| 2010/2/20 | 17.6 | 8.2  | 0    | 1.8 | 765 | 1125 | 68 |
| 2010/2/21 | 19.5 | 12.9 | 0    | 1.8 | 256 | 1121 | 75 |
| 2010/2/22 | 20.4 | 16.2 | 0    | 2.1 | 366 | 1107 | 81 |
| 2010/2/23 | 25.9 | 17.0 | 0    | 1.8 | 856 | 1233 | 76 |
| 2010/2/24 | 25.1 | 19.5 | 0    | 1.5 | 238 | 1046 | 81 |
| 2010/2/25 | 25.9 | 22.2 | 0    | 1.7 | 828 | 1221 | 84 |
| 2010/2/26 | 26.6 | 22.9 | 0    | 1.8 | 786 | 1053 | 85 |
| 2010/2/27 | 27.9 | 23.5 | 0    | 1.7 | 721 | 1153 | 83 |
| 2010/2/28 | 28.8 | 23.2 | 0    | 1.4 | 910 | 1119 | 80 |
| 2010/3/1  | 27.4 | 21.5 | 0    | 2.3 | 762 | 1138 | 80 |
| 2010/3/2  | 27.3 | 22.9 | 0    | 2.1 | 435 | 1422 | 81 |
| 2010/3/3  | 28.8 | 23.5 | 0    | 1.7 | 873 | 1230 | 75 |
| 2010/3/4  | 26.7 | 23.2 | 0    | 1.6 | 346 | 1451 | 81 |
| 2010/3/5  | 29.4 | 24.0 | 0    | 1.7 | 817 | 1245 | 74 |
| 2010/3/6  | 28.2 | 23.5 | 0    | 1.8 | 489 | 1008 | 81 |
| 2010/3/7  | 24.9 | 13.1 | 2.15 | 3.3 | 183 | 1233 | 88 |

|           |      |      |      |     |     |      |    |
|-----------|------|------|------|-----|-----|------|----|
| 2010/3/8  | 15.4 | 12.4 | 0.09 | 2.0 | 83  | 1045 | 90 |
| 2010/3/9  | 12.4 | 7.6  | 0.27 | 5.0 | 915 | 1229 | 69 |
| 2010/3/10 | 15.4 | 6.3  | 0    | 4.1 | 843 | 1223 | 37 |
| 2010/3/11 | 20.7 | 9.8  | 0    | 1.5 | 820 | 1043 | 46 |
| 2010/3/12 | 16.7 | 14.3 | 0.08 | 1.6 | 153 | 1036 | 81 |
| 2010/3/13 | 24.1 | 15.6 | 0    | 1.8 | 151 | 920  | 85 |
| 2010/3/14 | 27.2 | 19.6 | 0    | 2.9 | 849 | 1222 | 84 |
| 2010/3/15 | 28.2 | 21.3 | 0    | 1.9 | 828 | 1122 | 80 |
| 2010/3/16 | 24.2 | 17.6 | 0    | 2.3 | 281 | 1228 | 76 |
| 2010/3/17 | 22.6 | 17.0 | 0    | 2.1 | 477 | 1354 | 70 |
| 2010/3/18 | 26.1 | 18.0 | 0    | 1.7 | 792 | 1206 | 71 |
| 2010/3/19 | 26.8 | 18.3 | 0    | 1.6 | 702 | 1240 | 72 |
| 2010/3/20 | 26.0 | 18.7 | 0    | 1.5 | 627 | 1145 | 73 |
| 2010/3/21 | 28.5 | 19.6 | 0    | 1.9 | 794 | 1237 | 76 |
| 2010/3/22 | 27.5 | 18.7 | 0    | 2.3 | 912 | 1307 | 70 |
| 2010/3/23 | 28.4 | 20.6 | 0    | 1.8 | 812 | 1140 | 75 |
| 2010/3/24 | 29.3 | 22.0 | 0    | 1.8 | 915 | 1120 | 79 |
| 2010/3/25 | 24.5 | 13.3 | 0.8  | 5.9 | 724 | 1200 | 65 |
| 2010/3/26 | 21.2 | 14.7 | 0    | 3.2 | 873 | 1042 | 39 |
| 2010/3/27 | 20.0 | 16.0 | 0    | 1.9 | 539 | 1157 | 59 |
| 2010/3/28 | 25.1 | 15.9 | 0    | 2.2 | 831 | 1145 | 51 |
| 2010/3/29 | 20.5 | 16.6 | 0    | 2.0 | 734 | 1300 | 46 |
| 2010/3/30 | 21.8 | 17.9 | 0    | 3.6 | 278 | 1300 | 70 |
| 2010/3/31 | 26.2 | 19.9 | 0    | 2.3 | 929 | 1231 | 74 |
| 2010/4/1  | 28.4 | 21.2 | 0    | 2.5 | 799 | 1214 | 76 |
| 2010/4/2  | 23.6 | 18.5 | 0.57 | 1.4 | 86  | 1452 | 86 |

|           |      |      |      |     |      |      |    |
|-----------|------|------|------|-----|------|------|----|
| 2010/4/3  | 18.8 | 15.9 | 0.01 | 2.4 | 198  | 749  | 83 |
| 2010/4/4  | 23.1 | 17.5 | 0    | 2.8 | 318  | 935  | 82 |
| 2010/4/5  | 24.6 | 19.9 | 0    | 2.3 | 193  | 953  | 86 |
| 2010/4/6  | 26.5 | 21.7 | 0    | 1.6 | 347  | 1111 | 83 |
| 2010/4/7  | 24.4 | 17.8 | 0.07 | 3.0 | 167  | 1015 | 83 |
| 2010/4/8  | 18.6 | 15.0 | 0.73 | 2.4 | 577  | 1214 | 83 |
| 2010/4/9  | 22.3 | 16.7 | 0    | 1.4 | 589  | 1226 | 78 |
| 2010/4/10 | 20.7 | 19.1 | 0.03 | 3.2 | 150  | 1158 | 87 |
| 2010/4/11 | 28.2 | 20.4 | 0.01 | 1.9 | 345  | 1141 | 84 |
| 2010/4/12 | 29.6 | 23.6 | 0    | 1.6 | 819  | 1107 | 81 |
| 2010/4/13 | 30.9 | 21.6 | 0    | 2.7 | 356  | 1210 | 80 |
| 2010/4/14 | 21.7 | 18.3 | 0    | 3.4 | 398  | 1143 | 78 |
| 2010/4/15 | 20.0 | 11.6 | 2.35 | 3.1 | 66   | 838  | 84 |
| 2010/4/16 | 17.8 | 11.4 | 0.03 | 2.4 | 363  | 1036 | 70 |
| 2010/4/17 | 22.8 | 16.9 | 0    | 1.8 | 475  | 1308 | 74 |
| 2010/4/18 | 22.5 | 17.5 | 0.48 | 2.9 | 348  | 1228 | 84 |
| 2010/4/19 | 28.7 | 20.0 | 0    | 1.6 | 895  | 1323 | 80 |
| 2010/4/20 | 28.3 | 21.9 | 0    | 1.7 | 1033 | 1155 | 82 |
| 2010/4/21 | 29.1 | 23.8 | 0    | 1.4 | 1031 | 1147 | 80 |
| 2010/4/22 | 27.5 | 21.0 | 2.18 | 1.9 | 237  | 1442 | 88 |
| 2010/4/23 | 24.8 | 17.2 | 0.01 | 4.1 | 1153 | 1153 | 61 |
| 2010/4/24 | 25.5 | 19.2 | 0    | 1.8 | 1088 | 1207 | 55 |
| 2010/4/25 | 23.4 | 18.7 | 0    | 2.9 | 352  | 1240 | 56 |
| 2010/4/26 | 25.4 | 19.3 | 0.03 | 2.0 | 141  | 1203 | 76 |
| 2010/4/27 | 26.2 | 17.8 | 0.06 | 2.2 | 1006 | 1319 | 68 |
| 2010/4/28 | 25.4 | 21.0 | 0.35 | 1.0 | 715  | 1250 | 77 |

|                  |             |             |          |            |            |             |             |             |
|------------------|-------------|-------------|----------|------------|------------|-------------|-------------|-------------|
| 2010/4/29        | 25.5        | 18.2        | 4.07     | 2.5        |            | 146         | 853         | 87          |
| 2010/4/30        | 27.4        | 18.1        | 0.23     | 2.4        |            | 1004        | 1106        | 72          |
| 2010/5/1         | 28.8        | 20.0        | 0        | 1.5        |            | 1006        | 1128        | 71          |
| 2010/5/2         | 29.0        | 22.0        | 0        | 2.1        |            | 881         | 1108        | 73          |
| 2010/5/3         | 28.3        | 21.8        | 0        | 1.8        |            | 991         | 1113        | 73          |
| 2010/5/4         | 27.9        | 21.9        | 0        | 2.4        |            | 1121        | 1155        | 75          |
| 2010/5/5         | 29.3        | 23.6        | 0        | 1.3        |            | 432         | 1127        | 79          |
| 2010/5/6         | 29.9        | 25.6        | 0        | 1.5        |            | 865         | 1019        | 84          |
| 2010/5/7         | 28.9        | 21.7        | 10.08    | 1.4        |            | 515         | 939         | 84          |
| 2010/5/8         | 31.1        | 25.1        | 0        | 1.6        |            | 960         | 1243        | 81          |
| 2010/5/9         | 30.9        | 24.7        | 0.01     | 3.4        |            | 983         | 1227        | 78          |
| 2010/5/10        | 27.8        | 21.1        | 3.49     | 1.6        |            | 85          | 1444        | 89          |
| 2010/5/11        | 28.2        | 22.1        | 0.01     | 2.2        |            | 613         | 803         | 78          |
| 2010/5/12        | 28.5        | 22.9        | 0        | 2.7        |            | 920         | 1331        | 75          |
| 2010/5/13        | 27.3        | 22.7        | 0        | 2.9        |            | 919         | 1331        | 78          |
| 2010/5/14        | 29.8        | 23.6        | 0        | 2.1        |            | 993         | 1231        | 80          |
| 2010/5/15        | 28.3        | 22.7        | 1.34     | 3.2        |            | 588         | 1133        | 83          |
| <b>2010/5/16</b> | <b>30.0</b> | <b>23.2</b> | <b>0</b> | <b>2.1</b> | <b>2.1</b> | <b>1020</b> | <b>1146</b> | <b>82.4</b> |
| <b>2010/5/17</b> | <b>31.2</b> | <b>24.0</b> | <b>0</b> | <b>1.8</b> | <b>1.8</b> | <b>1158</b> | <b>1154</b> | <b>77.3</b> |
| <b>2010/5/18</b> | <b>30.6</b> | <b>24.8</b> | <b>0</b> | <b>1.0</b> | <b>1</b>   | <b>1075</b> | <b>1159</b> | <b>79.3</b> |
| <b>2010/5/19</b> | <b>30.6</b> | <b>23.1</b> | <b>0</b> | <b>0.9</b> | <b>0.9</b> | <b>286</b>  | <b>1446</b> | <b>85.4</b> |
| <b>2010/5/20</b> | <b>30.4</b> | <b>22.0</b> | <b>0</b> | <b>1.0</b> | <b>1</b>   | <b>886</b>  | <b>1055</b> | <b>80.3</b> |
| <b>2010/5/21</b> | <b>31.6</b> | <b>26.0</b> | <b>0</b> | <b>1.3</b> | <b>1.3</b> | <b>1087</b> | <b>1145</b> | <b>80.3</b> |
| <b>2010/5/22</b> | <b>29.0</b> | <b>26.7</b> | <b>0</b> | <b>2.6</b> | <b>2.6</b> | <b>859</b>  | <b>832</b>  | <b>83.4</b> |
| <b>2010/5/23</b> | <b>28.3</b> | <b>23.8</b> | <b>0</b> | <b>1.7</b> | <b>1.7</b> | <b>1049</b> | <b>1404</b> | <b>79.3</b> |
| <b>2010/5/24</b> | <b>31.9</b> | <b>22.4</b> | <b>0</b> | <b>1.2</b> | <b>1.2</b> | <b>1005</b> | <b>1147</b> | <b>51.9</b> |

|                  |             |             |          |            |            |                         |                          |             |
|------------------|-------------|-------------|----------|------------|------------|-------------------------|--------------------------|-------------|
| <b>2010/5/25</b> | <b>31.5</b> | <b>22.1</b> | <b>0</b> | <b>1.2</b> | <b>1.2</b> | <b>956</b>              | <b>1131</b>              | <b>61</b>   |
| <b>2010/5/26</b> | <b>30.9</b> | <b>23.4</b> | <b>0</b> | <b>1.3</b> | <b>1.3</b> | <b>951</b>              | <b>1203</b>              | <b>67.1</b> |
| <b>2010/5/27</b> | <b>28.3</b> | <b>25.2</b> | <b>0</b> | <b>1.3</b> | <b>1.3</b> | <b>991</b>              | <b>1118</b>              | <b>78.3</b> |
| <b>2010/5/28</b> | <b>31.7</b> | <b>25.2</b> | <b>0</b> | <b>1.1</b> | <b>1.1</b> | <b>1084</b>             | <b>1110</b>              | <b>76.3</b> |
| <b>2010/5/29</b> | <b>30.1</b> | <b>24.6</b> | <b>0</b> | <b>1.6</b> | <b>1.6</b> | <b>958</b>              | <b>1237</b>              | <b>84.4</b> |
| <b>2010/5/30</b> | <b>29.4</b> | <b>24.9</b> | <b>0</b> | <b>0.3</b> | <b>0.3</b> | <b>802</b>              | <b>1353</b>              | <b>88.5</b> |
| <b>2010/5/31</b> | <b>27.1</b> | <b>24.4</b> | <b>0</b> | <b>1.7</b> | <b>1.7</b> | <b>784</b>              | <b>1101</b>              | <b>80.3</b> |
| <b>2010/6/1</b>  | <b>27.4</b> | <b>21.9</b> | <b>0</b> | <b>2.3</b> | <b>2.3</b> | <b>617</b>              | <b>903</b>               | <b>65.1</b> |
| <b>2010/6/2</b>  | <b>23.7</b> | <b>19.8</b> | <b>0</b> | <b>2.1</b> | <b>2.1</b> | <b>856</b> <sup>@</sup> | <b>1200</b> <sup>@</sup> | <b>88.5</b> |
| <b>2010/6/3</b>  | <b>26.5</b> | <b>19.5</b> | <b>0</b> | <b>0.7</b> | <b>0.7</b> | <b>1094</b>             | <b>1039</b>              | <b>82.4</b> |
| <b>2010/6/4</b>  | <b>28.4</b> | <b>22.5</b> | <b>0</b> | <b>0.8</b> | <b>0.8</b> | <b>1067</b>             | <b>1229</b>              | <b>82.4</b> |
| 2010/6/5         | 28.8        | 23.6        | 0.07     | 1.4        |            | 917                     | 1229                     | 76          |
| 2010/6/6         | 29.5        | 23.0        | 0        | 1.4        |            | 872                     | 1133                     | 71          |
| 2010/6/7         | 29.5        | 23.1        | 0        | 2.0        |            | 974                     | 1221                     | 67          |
| 2010/6/8         | 29.4        | 23.4        | 0        | 2.3        |            | 1019                    | 948                      | 69          |
| 2010/6/9         | 28.8        | 23.9        | 0.63     | 1.7        |            | 954                     | 1413                     | 87          |
| 2010/6/10        | 27.5        | 24.6        | 3.89     | 1.2        |            | 506                     | 1536                     | 90          |
| 2010/6/11        | 30.7        | 25.3        | 0        | 1.5        |            | 615                     | 1407                     | 82          |
| 2010/6/12        | 30.4        | 24.7        | 0.92     | 1.5        |            | 873                     | 1347                     | 80          |
| 2010/6/13        | 30.1        | 26.4        | 0.17     | 4.4        |            | 900                     | 1252                     | 88          |
| 2010/6/14        | 30.4        | 27.3        | 0.07     | 6.1        |            | 1147                    | 1132                     | 83          |
| 2010/6/15        | 30.0        | 27.7        | 0.02     | 5.5        |            | 622                     | 1213                     | 87          |
| 2010/6/16        | 30.2        | 27.9        | 0        | 3.7        |            | 526                     | 1059                     | 84          |
| 2010/6/17        | 31.0        | 28.3        | 0        | 5.5        |            | 908                     | 1236                     | 79          |
| 2010/6/18        | 31.0        | 28.0        | 0        | 6.2        |            | 982                     | 1138                     | 76          |
| 2010/6/19        | 31.8        | 27.6        | 0        | 3.5        |            | 1229                    | 1042                     | 75          |

|                  |             |             |          |            |            |             |             |             |
|------------------|-------------|-------------|----------|------------|------------|-------------|-------------|-------------|
| 2010/6/20        | 30.9        | 28.0        | 0        | 3.4        |            | 703         | 917         | 78          |
| 2010/6/21        | 32.1        | 27.5        | 0        | 2.6        |            | 1015        | 1319        | 77          |
| <b>2010/6/22</b> | <b>32.3</b> | <b>27.4</b> | <b>0</b> | <b>1.2</b> | <b>0.8</b> | <b>1194</b> | <b>1312</b> | <b>74.3</b> |
| <b>2010/6/23</b> | <b>30.4</b> | <b>24.5</b> | <b>0</b> | <b>0.6</b> | <b>0.4</b> | <b>1029</b> | <b>1122</b> | <b>83.1</b> |
| <b>2010/6/24</b> | <b>30.7</b> | <b>27.1</b> | <b>0</b> | <b>1.9</b> | <b>1.3</b> | <b>928</b>  | <b>1017</b> | <b>83.1</b> |
| <b>2010/6/25</b> | <b>29.3</b> | <b>26.6</b> | <b>0</b> | <b>1.7</b> | <b>1.2</b> | <b>350</b>  | <b>1331</b> | <b>81.2</b> |
| <b>2010/6/26</b> | <b>27.7</b> | <b>25.2</b> | <b>0</b> | <b>1.0</b> | <b>0.7</b> | <b>144</b>  | <b>1232</b> | <b>90</b>   |
| <b>2010/6/27</b> | <b>27.3</b> | <b>24.8</b> | <b>0</b> | <b>0.7</b> | <b>0.5</b> | <b>194</b>  | <b>1503</b> | <b>87</b>   |
| <b>2010/6/28</b> | <b>27.7</b> | <b>24.2</b> | <b>0</b> | <b>0.7</b> | <b>0.5</b> | <b>126</b>  | <b>738</b>  | <b>89</b>   |
| <b>2010/6/29</b> | <b>32.4</b> | <b>24.6</b> | <b>0</b> | <b>1.0</b> | <b>0.7</b> | <b>1150</b> | <b>1320</b> | <b>76.3</b> |
| <b>2010/6/30</b> | <b>33.1</b> | <b>26.4</b> | <b>0</b> | <b>0.5</b> | <b>0.3</b> | <b>1012</b> | <b>1313</b> | <b>74.3</b> |
| <b>2010/7/1</b>  | <b>32.9</b> | <b>26.4</b> | <b>0</b> | <b>1.0</b> | <b>0.7</b> | <b>1025</b> | <b>1143</b> | <b>69.4</b> |
| <b>2010/7/2</b>  | <b>33.0</b> | <b>27.6</b> | <b>0</b> | <b>1.3</b> | <b>0.9</b> | <b>1048</b> | <b>1139</b> | <b>74.3</b> |
| <b>2010/7/3</b>  | <b>32.5</b> | <b>27.9</b> | <b>0</b> | <b>1.6</b> | <b>1.1</b> | <b>1053</b> | <b>1203</b> | <b>73.3</b> |
| <b>2010/7/4</b>  | <b>32.1</b> | <b>28.3</b> | <b>0</b> | <b>2.1</b> | <b>1.4</b> | <b>1108</b> | <b>1120</b> | <b>76.3</b> |
| <b>2010/7/5</b>  | <b>33.3</b> | <b>28.1</b> | <b>0</b> | <b>2.1</b> | <b>1.5</b> | <b>977</b>  | <b>1258</b> | <b>74.3</b> |
| <b>2010/7/6</b>  | <b>31.7</b> | <b>28.4</b> | <b>0</b> | <b>1.9</b> | <b>1.3</b> | <b>1029</b> | <b>1149</b> | <b>76.3</b> |
| <b>2010/7/7</b>  | <b>32.0</b> | <b>28.4</b> | <b>0</b> | <b>1.9</b> | <b>1.3</b> | <b>959</b>  | <b>1012</b> | <b>74.3</b> |
| <b>2010/7/8</b>  | <b>33.0</b> | <b>28.5</b> | <b>0</b> | <b>1.4</b> | <b>0.9</b> | <b>1032</b> | <b>1242</b> | <b>74.3</b> |
| <b>2010/7/9</b>  | <b>31.5</b> | <b>25.8</b> | <b>0</b> | <b>1.6</b> | <b>1.1</b> | <b>1089</b> | <b>1302</b> | <b>76.3</b> |
| <b>2010/7/10</b> | <b>33.2</b> | <b>25.7</b> | <b>0</b> | <b>0.8</b> | <b>0.5</b> | <b>1056</b> | <b>1209</b> | <b>71.4</b> |
| <b>2010/7/11</b> | <b>32.3</b> | <b>27.0</b> | <b>0</b> | <b>1.1</b> | <b>0.8</b> | <b>1120</b> | <b>1228</b> | <b>73.3</b> |
| <b>2010/7/12</b> | <b>32.8</b> | <b>27.5</b> | <b>0</b> | <b>0.9</b> | <b>0.6</b> | <b>1023</b> | <b>1310</b> | <b>71.4</b> |
| 2010/7/13        | 33.2        | 27.5        | 0.25     | 1.3        |            | 1027        | 1147        | 70          |
| 2010/7/14        | 34.8        | 27.6        | 0        | 2.6        |            | 927         | 1110        | 71          |
| 2010/7/15        | 33.0        | 27.6        | 0.05     | 2.2        |            | 1010        | 1009        | 70          |

|                  |             |             |          |            |            |             |             |             |
|------------------|-------------|-------------|----------|------------|------------|-------------|-------------|-------------|
| 2010/7/16        | 32.5        | 24.8        | 1.76     | 3.6        |            | 1148        | 1101        | 75          |
| 2010/7/17        | 32.0        | 23.7        | 1.63     | 2.5        |            | 1139        | 1157        | 80          |
| 2010/7/18        | 33.1        | 24.7        | 0.39     | 1.6        |            | 1030        | 1049        | 74          |
| 2010/7/19        | 33.7        | 26.5        | 0        | 1.7        |            | 1020        | 1140        | 71          |
| 2010/7/20        | 33.7        | 27.2        | 0        | 1.4        |            | 996         | 1205        | 67          |
| 2010/7/21        | 31.2        | 25.1        | 2.05     | 2.6        |            | 980         | 1248        | 83          |
| 2010/7/22        | 29.5        | 24.8        | 3.13     | 3.3        |            | 838         | 1010        | 85          |
| 2010/7/23        | 31.6        | 25.0        | 1.02     | 1.9        |            | 849         | 1340        | 83          |
| 2010/7/24        | 32.1        | 25.6        | 0.47     | 1.9        |            | 1007        | 1126        | 80          |
| 2010/7/25        | 33.2        | 26.1        | 0        | 1.2        |            | 993         | 1235        | 77          |
| 2010/7/26        | 32.6        | 26.6        | 0.04     | 2.7        |            | 956         | 1241        | 78          |
| 2010/7/27        | 28.7        | 25.0        | 6.27     | 2.3        |            | 230         | 1238        | 90          |
| 2010/7/28        | 28.5        | 24.4        | 14.49    | 2.5        |            | 721         | 1121        | 92          |
| 2010/7/29        | 31.1        | 22.1        | 2.52     | 1.8        |            | 1146        | 1319        | 93          |
| 2010/7/30        | 31.9        | 23.1        | 0.07     | 1.2        |            | 1021        | 1157        | 84          |
| <b>2010/7/31</b> | <b>32.8</b> | <b>27.6</b> | <b>0</b> | <b>1.4</b> | <b>1.2</b> | <b>1057</b> | <b>1240</b> | <b>77.4</b> |
| <b>2010/8/1</b>  | <b>34.1</b> | <b>27.6</b> | <b>0</b> | <b>0.5</b> | <b>0.5</b> | <b>1032</b> | <b>1122</b> | <b>80.5</b> |
| <b>2010/8/2</b>  | <b>32.5</b> | <b>27.3</b> | <b>0</b> | <b>1.4</b> | <b>1.2</b> | <b>1019</b> | <b>1232</b> | <b>74.4</b> |
| <b>2010/8/3</b>  | <b>32.8</b> | <b>26.9</b> | <b>0</b> | <b>2.5</b> | <b>2.1</b> | <b>1018</b> | <b>1132</b> | <b>75.4</b> |
| <b>2010/8/4</b>  | <b>33.4</b> | <b>27.1</b> | <b>0</b> | <b>1.7</b> | <b>1.5</b> | <b>1011</b> | <b>1051</b> | <b>76.4</b> |
| <b>2010/8/5</b>  | <b>35.0</b> | <b>24.2</b> | <b>0</b> | <b>1.5</b> | <b>1.3</b> | <b>859</b>  | <b>1206</b> | <b>74.4</b> |
| <b>2010/8/6</b>  | <b>32.1</b> | <b>24.0</b> | <b>0</b> | <b>1.2</b> | <b>1</b>   | <b>730</b>  | <b>1214</b> | <b>78.4</b> |
| <b>2010/8/7</b>  | <b>33.5</b> | <b>26.8</b> | <b>0</b> | <b>1.5</b> | <b>1.3</b> | <b>849</b>  | <b>1009</b> | <b>72.3</b> |
| <b>2010/8/8</b>  | <b>33.0</b> | <b>27.4</b> | <b>0</b> | <b>1.5</b> | <b>1.3</b> | <b>1150</b> | <b>1255</b> | <b>73.3</b> |
| <b>2010/8/9</b>  | <b>33.6</b> | <b>27.8</b> | <b>0</b> | <b>1.5</b> | <b>1.3</b> | <b>1002</b> | <b>1209</b> | <b>72.3</b> |
| <b>2010/8/10</b> | <b>33.8</b> | <b>27.2</b> | <b>0</b> | <b>0.8</b> | <b>0.7</b> | <b>1040</b> | <b>1212</b> | <b>76.4</b> |

|           |      |      |      |     |     |      |      |      |
|-----------|------|------|------|-----|-----|------|------|------|
| 2010/8/11 | 31.4 | 27.4 | 0    | 0.8 | 0.7 | 1059 | 1223 | 79.4 |
| 2010/8/12 | 32.8 | 27.0 | 0    | 2.1 | 1.8 | 1087 | 1152 | 73.3 |
| 2010/8/13 | 32.7 | 27.6 | 0    | 1.6 | 1.4 | 1042 | 1159 | 77.4 |
| 2010/8/14 | 32.7 | 27.6 | 0    | 0.9 | 0.8 | 1024 | 1133 | 78.4 |
| 2010/8/15 | 31.6 | 25.6 | 0    | 1.5 | 1.3 | 711  | 1158 | 81.5 |
| 2010/8/16 | 30.4 | 24.4 | 0    | 1.5 | 1.3 | 1264 | 1052 | 90.6 |
| 2010/8/17 | 31.8 | 24.9 | 0    | 0.9 | 0.8 | 1169 | 1300 | 83.5 |
| 2010/8/18 | 32.2 | 26.1 | 0    | 1.6 | 1.4 | 822  | 1353 | 75.4 |
| 2010/8/19 | 31.3 | 27.7 | 0    | 1.6 | 1.4 | 1010 | 1116 | 75.4 |
| 2010/8/20 | 32.8 | 25.5 | 0    | 1.5 | 1.3 | 997  | 1134 | 73.3 |
| 2010/8/21 | 33.6 | 26.9 | 0    | 1.7 |     | 923  | 1111 | 68   |
| 2010/8/22 | 33.4 | 28.2 | 0    | 3.0 |     | 970  | 1231 | 67   |
| 2010/8/23 | 31.7 | 26.7 | 0    | 2.6 |     | 1017 | 1221 | 71   |
| 2010/8/24 | 30.2 | 23.8 | 0.98 | 2.6 |     | 729  | 920  | 83   |
| 2010/8/25 | 31.5 | 25.7 | 0.21 | 1.3 |     | 1131 | 1245 | 76   |
| 2010/8/26 | 31.7 | 26.2 | 0    | 0.9 | 0.8 | 971  | 1121 | 82.9 |
| 2010/8/27 | 32.3 | 25.8 | 0    | 0.8 | 0.7 | 832  | 1120 | 77.6 |
| 2010/8/28 | 32.6 | 25.0 | 0    | 0.8 | 0.7 | 952  | 1220 | 78.7 |
| 2010/8/29 | 33.5 | 26.0 | 0    | 1.0 | 0.9 | 903  | 1136 | 74.5 |
| 2010/8/30 | 34.2 | 27.2 | 0    | 1.5 | 1.3 | 915  | 1157 | 67.1 |
| 2010/8/31 | 35.3 | 28.3 | 0    | 1.2 | 1.1 | 919  | 1200 | 56.6 |
| 2010/9/1  | 34.4 | 29.1 | 0    | 2.0 | 1.7 | 880  | 1203 | 53.5 |
| 2010/9/2  | 32.5 | 25.7 | 0    | 1.6 | 1.4 | 772  | 1344 | 69.2 |
| 2010/9/3  | 27.9 | 24.5 | 0    | 1.4 | 1.2 | 23   | 649  | 92.3 |
| 2010/9/4  | 27.8 | 23.9 | 0    | 0.9 | 0.8 | 295  | 1352 | 92.3 |
| 2010/9/5  | 32.7 | 25.9 | 0    | 0.8 | 0.7 | 996  | 1139 | 77.6 |

|                  |             |             |          |            |            |             |             |             |
|------------------|-------------|-------------|----------|------------|------------|-------------|-------------|-------------|
| <b>2010/9/6</b>  | <b>32.4</b> | <b>26.4</b> | <b>0</b> | <b>1.2</b> | <b>1.1</b> | <b>880</b>  | <b>1240</b> | <b>79.7</b> |
| <b>2010/9/7</b>  | <b>31.9</b> | <b>27.3</b> | <b>0</b> | <b>1.2</b> | <b>1.1</b> | <b>872</b>  | <b>1235</b> | <b>81.8</b> |
| <b>2010/9/8</b>  | <b>34.7</b> | <b>28.0</b> | <b>0</b> | <b>1.4</b> | <b>1.2</b> | <b>822</b>  | <b>1215</b> | <b>83.9</b> |
| <b>2010/9/9</b>  | <b>31.8</b> | <b>24.5</b> | <b>0</b> | <b>0.9</b> | <b>0.8</b> | <b>846</b>  | <b>1108</b> | <b>91.3</b> |
| <b>2010/9/10</b> | <b>32.0</b> | <b>23.3</b> | <b>0</b> | <b>1.1</b> | <b>1</b>   | <b>890</b>  | <b>1158</b> | <b>86</b>   |
| <b>2010/9/11</b> | <b>29.1</b> | <b>24.1</b> | <b>0</b> | <b>0.6</b> | <b>0.5</b> | <b>1025</b> | <b>1216</b> | <b>96.5</b> |
| <b>2010/9/12</b> | <b>30.2</b> | <b>24.5</b> | <b>0</b> | <b>0.7</b> | <b>0.6</b> | <b>244</b>  | <b>1036</b> | <b>93.3</b> |
| <b>2010/9/13</b> | <b>30.9</b> | <b>23.9</b> | <b>0</b> | <b>0.9</b> | <b>0.8</b> | <b>1037</b> | <b>1229</b> | <b>91.3</b> |
| <b>2010/9/14</b> | <b>31.5</b> | <b>25.7</b> | <b>0</b> | <b>1.2</b> | <b>1.1</b> | <b>999</b>  | <b>1138</b> | <b>83.9</b> |
| 2010/9/15        | 33.0        | 25.6        | 0        | 2.1        |            | 972         | 1155        | 77          |
| 2010/9/16        | 33.2        | 25.7        | 0        | 1.7        |            | 792         | 1130        | 76          |
| 2010/9/17        | 32.5        | 25.9        | 0        | 2.4        |            | 718         | 1129        | 73          |
| 2010/9/18        | 33.1        | 26.9        | 0        | 3.9        |            | 868         | 1233        | 76          |
| 2010/9/19        | 34.4        | 25.6        | 0        | 1.4        |            | 874         | 1214        | 70          |
| 2010/9/20        | 32.6        | 24.7        | 3.13     | 2.5        |            | 925         | 1237        | 77          |
| 2010/9/21        | 26.5        | 23.4        | 5.19     | 2.9        |            | 179         | 1535        | 92          |
| 2010/9/22        | 27.1        | 23.0        | 1.36     | 1.9        |            | 127         | 856         | 88          |
| 2010/9/23        | 29.7        | 24.4        | 0.71     | 1.5        |            | 832         | 1330        | 88          |
| 2010/9/24        | 31.8        | 24.9        | 0.01     | 1.5        |            | 986         | 1038        | 76          |
| 2010/9/25        | 30.6        | 25.4        | 0        | 2.1        |            | 789         | 1017        | 79          |
| 2010/9/26        | 31.7        | 25.2        | 0        | 1.8        |            | 859         | 1109        | 71          |
| 2010/9/27        | 31.0        | 25.3        | 0        | 1.6        |            | 799         | 1053        | 76          |
| 2010/9/28        | 32.4        | 25.9        | 0        | 2.1        |            | 858         | 1207        | 72          |
| 2010/9/29        | 31.5        | 26.9        | 0        | 2.2        |            | 846         | 1055        | 70          |
| 2010/9/30        | 28.9        | 24.3        | 0.84     | 2.2        |            | 750         | 1406        | 81          |
| 2010/10/1        | 30.6        | 24.4        | 0.23     | 3.3        |            | 965         | 1219        | 75          |

|            |      |      |      |     |      |      |    |
|------------|------|------|------|-----|------|------|----|
| 2010/10/2  | 31.6 | 25.1 | 0.11 | 2.5 | 994  | 1206 | 71 |
| 2010/10/3  | 30.3 | 25.4 | 0    | 3.5 | 1021 | 1026 | 62 |
| 2010/10/4  | 28.2 | 22.9 | 0    | 3.1 | 644  | 1101 | 52 |
| 2010/10/5  | 25.1 | 23.0 | 0    | 2.6 | 666  | 1029 | 54 |
| 2010/10/6  | 27.1 | 21.5 | 0.02 | 1.9 | 1135 | 1038 | 70 |
| 2010/10/7  | 27.7 | 23.3 | 0    | 2.3 | 635  | 902  | 63 |
| 2010/10/8  | 28.9 | 24.1 | 0    | 2.2 | 916  | 1100 | 67 |
| 2010/10/9  | 26.3 | 23.5 | 1    | 2.0 | 209  | 1309 | 85 |
| 2010/10/10 | 26.2 | 23.3 | 0.1  | 2.4 | 886  | 1039 | 84 |
| 2010/10/11 | 29.9 | 25.2 | 0    | 2.9 | 1064 | 1331 | 83 |
| 2010/10/12 | 32.0 | 25.2 | 0    | 1.8 | 976  | 1117 | 77 |
| 2010/10/13 | 32.1 | 25.0 | 0    | 2.3 | 710  | 1055 | 73 |
| 2010/10/14 | 31.8 | 26.0 | 0    | 1.6 | 715  | 1030 | 75 |
| 2010/10/15 | 27.7 | 23.3 | 2.32 | 2.7 | 1031 | 1229 | 74 |
| 2010/10/16 | 27.1 | 22.3 | 0    | 2.7 | 1097 | 1133 | 68 |
| 2010/10/17 | 29.6 | 23.4 | 0    | 2.1 | 1004 | 1142 | 70 |
| 2010/10/18 | 29.6 | 24.1 | 0    | 2.5 | 829  | 1247 | 65 |
| 2010/10/19 | 28.5 | 23.2 | 0    | 2.5 | 803  | 1157 | 57 |
| 2010/10/20 | 28.3 | 23.9 | 0    | 4.0 | 898  | 1121 | 56 |
| 2010/10/21 | 27.1 | 23.1 | 0    | 5.7 | 975  | 1232 | 62 |
| 2010/10/22 | 24.6 | 21.0 | 0    | 3.1 | 827  | 1156 | 62 |
| 2010/10/23 | 28.0 | 20.9 | 0    | 2.4 | 795  | 1142 | 56 |
| 2010/10/24 | 27.9 | 21.3 | 0    | 1.7 | 930  | 1226 | 62 |
| 2010/10/25 | 26.7 | 22.4 | 0    | 3.0 | 850  | 948  | 62 |
| 2010/10/26 | 24.5 | 19.8 | 0    | 4.5 | 146  | 1139 | 65 |
| 2010/10/27 | 21.4 | 16.9 | 0    | 4.0 | 790  | 1151 | 54 |

|            |      |      |      |     |     |      |    |
|------------|------|------|------|-----|-----|------|----|
| 2010/10/28 | 21.0 | 14.4 | 0    | 3.6 | 796 | 1137 | 47 |
| 2010/10/29 | 21.5 | 15.0 | 0    | 3.3 | 786 | 1144 | 41 |
| 2010/10/30 | 21.7 | 14.9 | 0    | 3.6 | 778 | 1134 | 39 |
| 2010/10/31 | 24.5 | 15.8 | 0    | 2.8 | 788 | 1154 | 40 |
| 2010/11/1  | 25.2 | 16.1 | 0    | 1.6 | 798 | 1131 | 53 |
| 2010/11/2  | 25.1 | 17.0 | 0    | 2.4 | 780 | 1201 | 59 |
| 2010/11/3  | 24.7 | 17.3 | 0    | 2.6 | 749 | 1139 | 56 |
| 2010/11/4  | 21.8 | 17.0 | 0.2  | 2.3 | 810 | 1135 | 56 |
| 2010/11/5  | 19.4 | 16.1 | 0.83 | 1.3 | 372 | 1102 | 90 |
| 2010/11/6  | 20.5 | 16.3 | 1.4  | 1.7 | 733 | 1317 | 91 |
| 2010/11/7  | 27.2 | 18.2 | 0    | 1.6 | 731 | 1122 | 74 |
| 2010/11/8  | 26.9 | 18.8 | 0    | 1.5 | 789 | 1156 | 54 |
| 2010/11/9  | 25.5 | 18.9 | 0    | 2.7 | 749 | 1138 | 44 |
| 2010/11/10 | 26.5 | 17.3 | 0    | 2.4 | 837 | 1146 | 64 |
| 2010/11/11 | 26.7 | 16.4 | 0    | 1.2 | 725 | 1213 | 50 |
| 2010/11/12 | 26.8 | 17.4 | 0    | 2.4 | 747 | 1142 | 58 |
| 2010/11/13 | 27.2 | 18.8 | 0    | 1.8 | 879 | 1125 | 64 |
| 2010/11/14 | 27.5 | 19.9 | 0    | 1.6 | 791 | 1240 | 72 |
| 2010/11/15 | 27.1 | 21.9 | 0    | 2.3 | 626 | 936  | 70 |
| 2010/11/16 | 24.6 | 19.4 | 0    | 2.3 | 648 | 1209 | 65 |
| 2010/11/17 | 23.6 | 16.3 | 0    | 3.3 | 678 | 1122 | 63 |
| 2010/11/18 | 25.2 | 19.3 | 0    | 2.5 | 658 | 1149 | 67 |
| 2010/11/19 | 25.2 | 18.3 | 0    | 1.7 | 653 | 1138 | 69 |
| 2010/11/20 | 23.6 | 17.7 | 0    | 2.5 | 696 | 1136 | 67 |
| 2010/11/21 | 26.6 | 18.8 | 0    | 2.3 | 708 | 1124 | 73 |
| 2010/11/22 | 25.8 | 19.4 | 0    | 1.9 | 656 | 1204 | 73 |

|            |      |      |      |     |     |      |    |
|------------|------|------|------|-----|-----|------|----|
| 2010/11/23 | 24.8 | 17.4 | 0    | 1.8 | 650 | 1149 | 60 |
| 2010/11/24 | 24.0 | 17.9 | 0    | 2.0 | 786 | 1208 | 69 |
| 2010/11/25 | 23.5 | 17.5 | 0    | 2.8 | 669 | 1130 | 54 |
| 2010/11/26 | 23.5 | 16.3 | 0    | 2.2 | 654 | 1154 | 49 |
| 2010/11/27 | 24.0 | 17.5 | 0    | 1.9 | 647 | 1317 | 67 |
| 2010/11/28 | 25.9 | 18.3 | 0    | 1.9 | 831 | 1143 | 62 |
| 2010/11/29 | 25.4 | 17.9 | 0    | 1.3 | 552 | 1201 | 74 |
| 2010/11/30 | 25.0 | 18.6 | 0    | 1.6 | 628 | 1213 | 69 |
| 2010/12/1  | 25.0 | 17.2 | 0    | 2.2 | 682 | 1153 | 63 |
| 2010/12/2  | 25.5 | 17.7 | 0    | 1.7 | 672 | 1138 | 64 |
| 2010/12/3  | 25.2 | 18.0 | 0    | 2.5 | 689 | 1138 | 49 |
| 2010/12/4  | 25.1 | 17.8 | 0    | 1.7 | 638 | 1157 | 52 |
| 2010/12/5  | 28.0 | 18.5 | 0    | 1.8 | 724 | 1009 | 65 |
| 2010/12/6  | 27.3 | 20.6 | 0    | 2.1 | 603 | 1156 | 57 |
| 2010/12/7  | 24.5 | 17.3 | 0    | 3.6 | 585 | 1151 | 44 |
| 2010/12/8  | 20.1 | 13.2 | 0    | 2.4 | 674 | 1147 | 30 |
| 2010/12/9  | 21.1 | 12.6 | 0    | 2.4 | 985 | 1204 | 37 |
| 2010/12/10 | 22.5 | 16.1 | 0    | 2.5 | 197 | 1109 | 64 |
| 2010/12/11 | 21.4 | 17.6 | 0    | 1.9 | 112 | 919  | 64 |
| 2010/12/12 | 20.7 | 18.7 | 0    | 3.3 | 324 | 1052 | 77 |
| 2010/12/13 | 26.7 | 20.2 | 0    | 2.0 | 698 | 1235 | 82 |
| 2010/12/14 | 22.7 | 20.0 | 0    | 2.2 | 145 | 1226 | 83 |
| 2010/12/15 | 20.6 | 12.9 | 0.98 | 3.4 | 66  | 922  | 86 |
| 2010/12/16 | 12.9 | 5.9  | 0.6  | 5.8 | 544 | 1436 | 70 |
| 2010/12/17 | 14.4 | 2.4  | 0    | 2.4 | 722 | 1132 | 46 |
| 2010/12/18 | 19.1 | 7.4  | 0    | 1.7 | 670 | 1135 | 50 |

|            |      |      |      |     |     |      |    |
|------------|------|------|------|-----|-----|------|----|
| 2010/12/19 | 23.8 | 14.2 | 0    | 1.2 | 642 | 1131 | 64 |
| 2010/12/20 | 24.4 | 16.7 | 0    | 1.0 | 771 | 1100 | 70 |
| 2010/12/21 | 24.6 | 18.4 | 0    | 1.3 | 789 | 1258 | 66 |
| 2010/12/22 | 23.7 | 17.1 | 0    | 2.3 | 637 | 1205 | 52 |
| 2010/12/23 | 24.5 | 14.3 | 0    | 1.8 | 676 | 941  | 59 |
| 2010/12/24 | 22.1 | 16.3 | 0    | 2.2 | 713 | 1058 | 66 |
| 2010/12/25 | 18.5 | 10.2 | 0    | 3.9 | 81  | 1358 | 78 |
| 2010/12/26 | 14.8 | 7.7  | 0.05 | 3.3 | 693 | 1204 | 55 |
| 2010/12/27 | 18.7 | 7.7  | 0    | 1.8 | 694 | 1143 | 40 |
| 2010/12/28 | 22.2 | 9.8  | 0    | 1.3 | 650 | 1124 | 55 |
| 2010/12/29 | 23.9 | 12.0 | 0    | 1.5 | 623 | 1205 | 58 |
| 2010/12/30 | 21.2 | 14.0 | 0    | 2.8 | 662 | 1211 | 51 |
| 2010/12/31 | 18.7 | 12.1 | 0    | 3.5 | 678 | 1204 | 24 |

---

The sites are Changshu (CS), Danyang (DY), Fengqiu with rice paddy fields (FQP), Shenzhen (SZ), and Yingtian (YTA).  $T_{\max}$ ,  $T_{\min}$ ,  $P$ ,  $W$ ,  $R_{\max}$ ,  $M$ ,  $R_{\text{ave}}$  and RH denote the maximum and minimum daily air temperature ( $^{\circ}\text{C}$ ), daily precipitation ( $\text{cm d}^{-1}$ ), wind speed ( $\text{m s}^{-1}$ ), maximum daily solar radiation ( $\text{W m}^{-2}$ ), the moment of  $R_{\max}$  appearing ( $M$ , hour), average daily solar radiation ( $\text{W m}^{-2}$ ), and average daily relative humidity (%), respectively. The bold texts indicate the exact period(s) with daily observations of ammonia fluxes at each field site.  $W^*$  is for the simulation of P11, P13, P15 and P17 at Shenzhen.  $W^{\#}$  is for the simulation of P12, P14, P16 and P18 at Shenzhen. The definitions of the case codes are referred to Table 3. For  $R_{\max}$  and  $M$  with <sup>@</sup> are lack of measurement, and thus  $R_{\max}$  is arbitrarily set by referring to the average of the  $R_{\max}$  value of the day before and after;  $M$  is arbitrarily set at 12:00 o'clock this study.
