# Supplementary material for: Update a biogeochemical model with process-based algorithms to predict ammonia volatilization from fertilized uplands and rice paddy fields
Source: Copernicus journal article supplement (doi:10.5194/bg-2021-341), 2022-01-17
Supplement: Supplementary file [file bg-2021-341-AC1-supplement.zip]

**Table S84** Sources of the daily meteorological data of the individual rice paddy field sites for each period with ammonia observation (PAO) and for those beyond the PAO, and simulation configurations.

|               |                                                                                                                                                                                                                                                                                                                                                                                                                                                                                                                                                                                                                                                               |
|---------------|---------------------------------------------------------------------------------------------------------------------------------------------------------------------------------------------------------------------------------------------------------------------------------------------------------------------------------------------------------------------------------------------------------------------------------------------------------------------------------------------------------------------------------------------------------------------------------------------------------------------------------------------------------------|
| Changshu      |                                                                                                                                                                                                                                                                                                                                                                                                                                                                                                                                                                                                                                                               |
| PAO           | The maximum daily air temperature ( $T_{\max}$ , °C), the minimum daily air temperature ( $T_{\min}$ , °C), the average daily wind speed ( $W$ , m s <sup>-1</sup> ) and the average daily relative humidity (RH, %) in 2002/2003 and daily precipitation ( $P$ , mm d <sup>-1</sup> ) in 2003: Measured in Nantong (station no.: 58259; downloaded from the online database of China Meteorological Administration (CMA, <a href="http://www.data.cma.cn">http://www.data.cma.cn</a> ).                                                                                                                                                                      |
|               | Daily precipitation ( $P$ , mm d <sup>-1</sup> ) in 2002: Adapted from the observations in Nantong (station no.: 58259; downloaded from CMA) by referring to the periodically maximum value (45.2 mm) from 06/22 to 06/30, the periodically few amount (< 5 mm, arbitrarily) from 07/20 to 07/29, and the total value (29.1 mm) from 08/20 to 08/31 measured onsite by Song et al. (2004).<br>The maximum daily solar radiation ( $R_{\max}$ , W m <sup>-2</sup> ) and the moment of $R_{\max}$ appearing ( $M$ , hour) in 2002/2003: Measured in Shanghai (station no.: 58362; downloaded from CMA).                                                         |
| Beyond PAO    | $T_{\max}$ , $T_{\min}$ , $P$ , $W$ and RH in 2002/2003: Measured in Nantong (station no.: 58259; downloaded from CMA).<br>$R_{\max}$ and $M$ in 2002/2003: Measured in Shanghai (station no.: 58362; downloaded from CMA).                                                                                                                                                                                                                                                                                                                                                                                                                                   |
| Configuration | Ten years for spin-up, which was driven by the inputs of 2002; the last 2 years (2002–2003) for simulation.                                                                                                                                                                                                                                                                                                                                                                                                                                                                                                                                                   |
| Danyang       |                                                                                                                                                                                                                                                                                                                                                                                                                                                                                                                                                                                                                                                               |
| PAO           | $T_{\max}$ and $T_{\min}$ in 1984: Measured in Changzhou (station no.: 58343; downloaded from CMA).<br>$P$ in 1984: No precipitation, measured onsite by Cai et al. (1986).<br>$W$ in 1984: Adapted from the observations in Changzhou (station no.: 58343; downloaded from CMA) by referring to the periodically low values (1 m s <sup>-1</sup> , arbitrarily) from 06/20 to 06/27 measured onsite by Cai et al. (1986).<br>RH in 1984: Measured in Gaoyou (station no.: 58241; downloaded from CMA).<br>The average daily solar radiation ( $R_{\text{ave}}$ , W m <sup>-2</sup> ) in 1984: Measured in Nanjing (station no.: 58238; downloaded from CMA). |
|               | $T_{\max}$ , $T_{\min}$ , $P$ and $W$ in 1984: Measured in Changzhou (station no.: 58343; downloaded from CMA).<br>RH in 1984: Measured in Gaoyou (station no.: 58241; downloaded from CMA).<br>$R_{\text{ave}}$ in 1984: Measured in Nanjing (station no.: 58238; downloaded from CMA).                                                                                                                                                                                                                                                                                                                                                                      |
| Beyond PAO    |                                                                                                                                                                                                                                                                                                                                                                                                                                                                                                                                                                                                                                                               |

|               |                                                                                                                                                                                                                                                                                                                                                                                                                                                                                                                                                                                                                                                                                                                                                                                                                                                                                                                                                                                                                                                                                                                                                                                                                                                                                                                                                                                                                                                                                                               |
|---------------|---------------------------------------------------------------------------------------------------------------------------------------------------------------------------------------------------------------------------------------------------------------------------------------------------------------------------------------------------------------------------------------------------------------------------------------------------------------------------------------------------------------------------------------------------------------------------------------------------------------------------------------------------------------------------------------------------------------------------------------------------------------------------------------------------------------------------------------------------------------------------------------------------------------------------------------------------------------------------------------------------------------------------------------------------------------------------------------------------------------------------------------------------------------------------------------------------------------------------------------------------------------------------------------------------------------------------------------------------------------------------------------------------------------------------------------------------------------------------------------------------------------|
| Configuration | Ten years for spin-up, which was driven by the inputs of 1984; the last year (1984) for simulation.                                                                                                                                                                                                                                                                                                                                                                                                                                                                                                                                                                                                                                                                                                                                                                                                                                                                                                                                                                                                                                                                                                                                                                                                                                                                                                                                                                                                           |
| Fengqiu       |                                                                                                                                                                                                                                                                                                                                                                                                                                                                                                                                                                                                                                                                                                                                                                                                                                                                                                                                                                                                                                                                                                                                                                                                                                                                                                                                                                                                                                                                                                               |
| PAO           | $T_{\max}$ , $T_{\min}$ , $P$ , $W$ and RH in 1986: Measured in Kaifeng (station no.: 57091; downloaded from CMA).<br>$R_{\text{ave}}$ in 1986: Measured in Zhengzhou (station no.: 57083; downloaded from CMA).                                                                                                                                                                                                                                                                                                                                                                                                                                                                                                                                                                                                                                                                                                                                                                                                                                                                                                                                                                                                                                                                                                                                                                                                                                                                                              |
| Beyond PAO    | $T_{\max}$ , $T_{\min}$ , $P$ , $W$ and RH in 1986: Measured in Kaifeng (station no.: 57091; downloaded from CMA).<br>$R_{\text{ave}}$ in 1986: Measured in Zhengzhou (station no.: 57083; downloaded from CMA).                                                                                                                                                                                                                                                                                                                                                                                                                                                                                                                                                                                                                                                                                                                                                                                                                                                                                                                                                                                                                                                                                                                                                                                                                                                                                              |
| Configuration | Ten years for spin-up, which was driven by the inputs of 1986; the last year (1986) for simulation.                                                                                                                                                                                                                                                                                                                                                                                                                                                                                                                                                                                                                                                                                                                                                                                                                                                                                                                                                                                                                                                                                                                                                                                                                                                                                                                                                                                                           |
| Shenzhen      |                                                                                                                                                                                                                                                                                                                                                                                                                                                                                                                                                                                                                                                                                                                                                                                                                                                                                                                                                                                                                                                                                                                                                                                                                                                                                                                                                                                                                                                                                                               |
| PAO           | $T_{\max}$ and $T_{\min}$ in 2010: Measured in Shenzhen (station no.: 59493; downloaded from CMA).<br>$P$ in 2010: No data because the wind tunnel could not receive rainfall (Gong et al., 2013).<br>$W$ in 2010: Adapted from the observations in Shenzhen (station no.: 59493; downloaded from CMA) by referring to periodically average value $1.4 \text{ m s}^{-1}$ (for P11 and P12 cases) from 05/16 to 06/04, $1.3 \text{ m s}^{-1}$ (for P13 case) from 06/22 to 07/11, $0.89 \text{ m s}^{-1}$ (for P14 case) from 06/22 to 07/11, $1.4 \text{ m s}^{-1}$ (for P15 case) from 07/31 to 08/19, $1.2 \text{ m s}^{-1}$ (for P16 case) from 07/31 to 08/19, $1.1 \text{ m s}^{-1}$ (for P17 case) from 08/26 to 09/14, $0.96 \text{ m s}^{-1}$ (for P18 case) from 08/26 to 09/14 inside the wind tunnel measured onsite by Gong et al. (2013).<br>RH: Adapted from the observations in Shenzhen (station no.: 59493; downloaded from CMA) by referring to the periodically average value (77.7 %, 76.5 %, 77.3 %, 75.8 %, 77.1 %, 76.2 %, 80.5 % and 79.5 %) from 05/16 to 06/04 (for P11 case), from 05/16 to 06/04 (for P12 case), from 06/22 to 07/11 (for P13 case), from 06/22 to 07/11 (for P14 case), from 07/31 to 08/19 (for P15 case), from 07/31 to 08/19 (for P16 case), from 08/26 to 09/14 (for P17 case) and from 08/26 to 09/14 (for P18 case) measured onsite by Gong et al. (2013).<br>$R_{\max}$ and $M$ in 2010: Measured in Guangzhou (station no.: 59287; downloaded from CMA). |
| Beyond PAO    | $T_{\max}$ , $T_{\min}$ , $P$ , $W$ and RH in 2010: Measured in Shenzhen (station no.: 59493; downloaded from CMA).<br>$R_{\max}$ and $M$ in 2010: Measured in Guangzhou (station no.: 59287; downloaded from CMA).                                                                                                                                                                                                                                                                                                                                                                                                                                                                                                                                                                                                                                                                                                                                                                                                                                                                                                                                                                                                                                                                                                                                                                                                                                                                                           |
| Configuration | Ten years for spin-up, which was driven by the inputs of 2010; the last year (2010) for simulation.                                                                                                                                                                                                                                                                                                                                                                                                                                                                                                                                                                                                                                                                                                                                                                                                                                                                                                                                                                                                                                                                                                                                                                                                                                                                                                                                                                                                           |
| Yingtian      |                                                                                                                                                                                                                                                                                                                                                                                                                                                                                                                                                                                                                                                                                                                                                                                                                                                                                                                                                                                                                                                                                                                                                                                                                                                                                                                                                                                                                                                                                                               |

|               |                                                                                                                                                                                                             |
|---------------|-------------------------------------------------------------------------------------------------------------------------------------------------------------------------------------------------------------|
| PAO           | $T_{\max}$ , $T_{\min}$ , $P$ , $W$ and RH in 1992: Measured in Guixi (station no.: 58626; downloaded from CMA).<br>$R_{\text{ave}}$ in 1992: Measured in Jianou (station no.: 58737; downloaded from CMA). |
| Beyond PAO    | $T_{\max}$ , $T_{\min}$ , $P$ , $W$ and RH in 1992: Measured in Guixi (station no.: 58626; downloaded from CMA).<br>$R_{\text{ave}}$ in 1992: Measured in Jianou (station no.: 58737; downloaded from CMA). |
| Configuration | Ten years for spin-up, which was driven by the inputs of 1992; the last year (1992) for simulation.                                                                                                         |

The definitions of the case codes are referred to Table 3.

### Reference:

- Cai, G., Zhu, Z., Trevitt, A., Freney, J.R., Simpson, J.R., 1986. Nitrogen loss from ammonium bicarbonate and urea fertilizers applied to flooded rice. *Fertilizer Research* 10, 203–215.
- Gong, W., Zhang, Y., Huang, X., Luan, S., 2013. High-resolution measurement of ammonia emissions from fertilization of vegetable and rice crops in the Pearl River Delta Region, China. *Atmospheric Environment* 65, 1–10.
- Song, Y., Fan, X., Lin, D., Yang, L., Zhou, J., 2004. Ammonia volatilization from paddy fields in the Taihu lake region and its influencing factors. *Acta Pedologica Sinica*, 265–269.
